# Supplementary material for: Cerebellar and vestibular nuclear synapses in the inferior olive have distinct release kinetics and neurotransmitters
Source: eLife. 2020 Dec 1;9:e61672. doi: 10.7554/eLife.61672 (PMC7707816; doi:10.7554/eLife.61672)
Supplement: Figure 1—source data 1. [file elife-61672-fig1-data1.xlsx]

## Sheet: Figure 1
Figure 1, panel D-E; Figure 1 - Figure supplement 1, panel A-B																		Figure 1 - Figure supplement 2, panel A-B
Rostral IO									Caudal IO
Bouton #	IO_SubN	x	y	R2_Vgat-Syt	GlyT2+	GlyT2-			Bouton #	IO_SubN	x	y	R2_Vgat-Syt	GlyT2+	GlyT2-			Subnucleus	Total Vgat+ boutons	Vgat+, %Syt1/2+ (R2>0.25)	Vgat+, %GlyT2+	Vgat+, GlyT2+ %Syt1/2+ (R2>0.25)	Vgat+, %GlyT2-	Vgat+, GlyT2- %Syt1/2+ (R2>0.25)
1	RF	984	867	0.577936	1	0			43715	RF	8643	879	0.0734485	1	0			rDCK	644	94	66	81	34	29
2	RF	1004	808	0.727385	1	0			43716	RF	8703	842	0.431092	1	0			DAO	6982	11	13	72	87	1.6
3	RF	1009	870	0.521263	1	0			43717	RF	8706	877	0.518267	1	0			rIOBe	3053	23	20	85	80	8
4	RF	997	909	0.382804	1	0			43718	RF	8734	834	0.748951	1	0			rMAO	3300	3.9	5.4	65	95	0.5
5	RF	996	849	0.26424	0	1			43719	RF	8781	854	0.592823	1	0			PIO	10243	2.9	4.4	50	96	0.7
6	RF	1000	869	0.343453	1	0			43720	RF	8120	1478	0.372934	1	0			cDCK	1748	95	95	96	5	63
7	RF	992	917	0.547553	1	0			43721	RF	8422	1760	0.103427	1	0			cIOBe/C	6203	44	82	51	18	15
8	RF	997	851	0.354582	0	1			43722	RF	8438	1762	0.307252	1	0			IOB/A	20426	85	91	93	9.1	7.5
9	RF	988	973	0.526806	1	0			43723	RF	7904	1784	0.540078	1	0			RF	22082	93	94	95	6.1	62
10	RF	997	863	0.571043	1	0			43724	RF	7947	1463	0.576339	1	0
11	RF	984	867	0.58878	1	0			43725	RF	7985	1530	0.374493	1	0
12	RF	1003	808	0.566495	1	0			43726	RF	8042	1665	0.508711	1	0
13	RF	1033	929	0.593888	1	0			43727	RF	8062	1493	0.563931	1	0
14	RF	1037	823	0.29528	1	0			43728	RF	8076	1405	0.346918	1	0
15	RF	1189	878	0.513062	1	0			43729	RF	8077	1787	0.669707	1	0
16	RF	1215	867	0.667786	1	0			43730	RF	8083	1479	0.250856	1	0
17	RF	1257	787	0.503146	1	0			43731	RF	8095	1544	0.580831	1	0
18	RF	1303	809	0.0561596	0	1			43732	RF	8102	1746	0.547224	1	0
19	RF	1313	880	0.0715616	0	1			43733	RF	8114	1400	0.0383301	1	0
20	RF	1345	796	0.171115	1	0			43734	RF	8123	1522	0.449173	1	0
21	RF	1371	961	0.620183	1	0			43735	RF	8130	1811	0.300757	1	0
22	RF	1410	912	0.727942	1	0			43736	RF	8144	1505	0.629058	1	0
23	RF	1431	879	0.330042	1	0			43737	RF	8164	1528	0.470754	1	0
24	RF	1488	868	0.398207	1	0			43738	RF	8171	1487	0.167334	1	0
25	RF	1510	889	0.535688	1	0			43739	RF	8182	1444	0.421526	1	0
26	RF	1522	962	0.559094	1	0			43740	RF	8200	1477	0.444678	1	0
27	RF	1541	851	0.692859	1	0			43741	RF	8215	1702	0.34919	1	0
28	RF	1604	823	0.599811	1	0			43742	RF	8219	1753	0.4819	1	0
29	RF	1668	978	0.623536	1	0			43743	RF	8227	1129	0.4807	1	0
30	RF	1679	924	0.700901	1	0			43744	RF	8239	1468	0.494595	1	0
31	RF	1742	749	0.323419	1	0			43745	RF	8260	1786	0.54232	1	0
32	RF	1787	888	0.738981	1	0			43746	RF	8263	1168	0.192362	1	0
33	RF	1793	776	0.60561	1	0			43747	RF	8265	1195	0.327291	1	0
34	RF	1814	844	0.528587	1	0			43748	RF	8280	1827	0.0855135	1	0
35	RF	1004	844	0.01	0	1			43749	RF	8306	1745	0.217784	1	0
36	RF	1008	870	0.573713	1	0			43750	RF	8322	1722	0.368848	1	0
37	RF	1077	874	0.421176	1	0			43751	RF	8330	1170	0.402191	1	0
38	RF	1111	939	0.370048	1	0			43752	RF	8331	1801	0.537555	1	0
39	RF	1121	811	0.565953	1	0			43753	RF	8335	1146	0.273079	1	0
40	RF	1191	963	0.405037	0	1			43754	RF	8358	1162	0.610065	1	0
41	RF	1234	934	0.265421	0	1			43755	RF	8372	1796	0.585297	1	0
42	RF	1258	835	0.588917	1	0			43756	RF	8377	1698	0.21225	1	0
43	RF	1272	955	0.559733	1	0			43757	RF	8387	1752	0.244093	1	0
44	RF	1321	898	0.399392	0	1			43758	RF	8386	1812	0.570449	1	0
45	RF	1359	940	0.150357	1	0			43759	RF	8408	1583	0.406777	1	0
46	RF	1376	872	0.752299	1	0			43760	RF	8422	1797	0.251512	1	0
47	RF	1458	904	0.426114	1	0			43761	RF	8007	1434	0.57752	1	0
48	RF	1465	863	0.315668	1	0			43762	RF	8017	1811	0.484809	1	0
49	RF	1492	928	0.58321	1	0			43763	RF	8055	1807	0.536115	1	0
50	RF	1513	866	0.244271	0	1			43764	RF	8088	1462	0.47854	1	0
51	RF	1560	817	0.562223	1	0			43765	RF	8101	1405	0.170045	1	0
52	RF	1591	859	0.635272	1	0			43766	RF	8108	1477	0.143231	1	0
53	RF	1612	868	0.52154	1	0			43767	RF	8112	1254	0.513771	1	0
54	RF	1635	923	0.858761	1	0			43768	RF	8118	1513	0.199855	1	0
55	RF	1685	980	0.00186352	0	1			43769	RF	8142	1256	0.41666	1	0
56	RF	1770	782	0.483673	1	0			43770	RF	8157	1541	0.625336	1	0
57	RF	1793	810	0.612841	1	0			43771	RF	8157	1816	0.528419	1	0
58	RF	1804	789	0.315382	1	0			43772	RF	8159	1764	0.551357	1	0
59	RF	1804	963	0.695095	1	0			43773	RF	8172	1726	0.604465	1	0
60	RF	1820	940	0.38124	1	0			43774	RF	8198	1491	0.373855	1	0
61	RF	1831	766	0.611806	1	0			43775	RF	8199	1457	0.272304	1	0
62	RF	1845	967	0.662144	1	0			43776	RF	8215	1487	0.776951	1	0
63	RF	1910	857	0.345101	1	0			43777	RF	8227	1597	0.150381	1	0
64	RF	1027	889	0.371814	1	0			43778	RF	8273	1535	0.597082	0	1
65	RF	1050	911	0.392329	1	0			43779	RF	8276	1749	0.481585	1	0
66	RF	1181	893	0.537847	1	0			43780	RF	8288	1711	0.079761	1	0
67	RF	1214	869	0.63637	1	0			43781	RF	8295	1698	0.118054	1	0
68	RF	1269	929	0.298053	1	0			43782	RF	8308	1783	0.356875	1	0
69	RF	1398	852	0.514908	1	0			43783	RF	8310	1142	0.471571	1	0
70	RF	1421	839	0.694828	1	0			43784	RF	8316	1807	0.512198	1	0
71	RF	1430	897	0.758933	1	0			43785	RF	8333	1457	0.292769	1	0
72	RF	1446	931	0.590944	1	0			43786	RF	8337	1784	0.303576	1	0
73	RF	1548	905	0.728243	1	0			43787	RF	8343	1694	0.331025	1	0
74	RF	1603	824	0.644812	1	0			43788	RF	8357	1095	0.41	1	0
75	RF	1606	857	0.504536	1	0			43789	RF	8377	1363	0.537045	1	0
76	RF	1624	932	0.140781	0	1			43790	RF	8398	1099	0.277326	1	0
77	RF	1668	978	0.640333	1	0			43791	RF	8401	1452	0.420126	1	0
78	RF	1719	841	0.632645	1	0			43792	RF	8414	1701	0.136207	1	0
79	RF	1738	778	0.688112	1	0			43793	RF	8417	1426	0.270512	1	0
80	RF	1777	920	0.563284	1	0			43794	RF	8423	1725	0.498029	1	0
81	RF	1812	903	0.736312	1	0			43795	RF	8426	1393	0.394231	1	0
82	RF	1825	826	0.674916	1	0			43796	RF	8448	1409	0.225247	1	0
83	RF	1829	897	0.403123	1	0			43797	RF	8460	1405	0.218763	1	0
84	RF	1847	891	0.437132	1	0			43798	RF	7913	1501	0.208737	1	0
85	RF	1880	962	0.29589	0	1			43799	RF	7932	1695	0.572792	1	0
86	RF	1926	888	0.338742	0	1			43800	RF	7934	1733	0.585146	1	0
87	RF	1943	910	0.588801	1	0			43801	RF	7944	1479	0.766584	1	0
88	RF	984	866	0.508036	1	0			43802	RF	7998	1790	0.410755	1	0
89	RF	995	913	0.51718	1	0			43803	RF	8045	1796	0.0911599	1	0
90	RF	1010	869	0.511393	1	0			43804	RF	8049	1487	0.203566	1	0
91	RF	1071	953	0.58566	1	0			43805	RF	8062	1667	0.260904	1	0
92	RF	1092	925	0.622485	1	0			43806	RF	8093	1658	0.599974	1	0
93	RF	1144	929	0.58199	1	0			43807	RF	8096	1773	0.270604	1	0
94	RF	1191	963	0.297099	0	1			43808	RF	8103	1745	0.313536	1	0
95	RF	1252	941	0.649445	1	0			43809	RF	8127	1254	0.326623	1	0
96	RF	1314	811	0.455196	1	0			43810	RF	8141	1770	0.0664031	1	0
97	RF	1333	945	0.336848	1	0			43811	RF	8149	1459	0.297918	1	0
98	RF	1375	873	0.613887	1	0			43812	RF	8179	1806	0.20077	1	0
99	RF	1382	911	0.611097	1	0			43813	RF	8204	1718	0.33228	1	0
100	RF	1394	878	0.4774	1	0			43814	RF	8207	1630	0.385843	1	0
101	RF	1450	839	0.707003	1	0			43815	RF	8220	1765	0.465568	1	0
102	RF	1451	907	0.284979	1	0			43816	RF	8234	1650	0.582378	1	0
103	RF	1561	807	0.534298	1	0			43817	RF	8264	1708	0.291016	1	0
104	RF	1622	942	0.246196	0	1			43818	RF	8279	1566	0.339916	1	0
105	RF	1697	844	0.497193	1	0			43819	RF	8298	1726	0.114988	1	0
106	RF	1698	946	0.241152	0	1			43820	RF	8310	1541	0.512532	1	0
107	RF	1705	881	0.748229	1	0			43821	RF	8321	1721	0.275201	1	0
108	RF	1755	771	0.739786	1	0			43822	RF	8321	1794	0.396049	1	0
109	RF	1768	781	0.524217	1	0			43823	RF	8324	1811	0.210664	1	0
110	RF	1809	746	0.265206	1	0			43824	RF	8351	1146	0.34647	1	0
111	RF	1837	880	0.254711	1	0			43825	RF	8386	1812	0.524532	1	0
112	RF	1859	825	0.208936	1	0			43826	RF	8398	1419	0.238368	1	0
113	RF	1859	972	0.690762	1	0			43827	RF	8405	1799	0.425963	1	0
114	RF	1887	861	0.616693	1	0			43828	RF	8417	1781	0.109502	1	0
115	RF	1887	919	0.610747	1	0			43829	RF	8429	1685	0.662882	1	0
116	RF	997	849	0.283866	0	1			43830	RF	8435	1313	0.188266	1	0
117	RF	1004	844	0.00188771	0	1			43831	RF	8444	1513	0.325468	1	0
118	RF	1027	889	0.38154	1	0			43832	RF	8444	1527	0.278762	1	0
119	RF	1036	826	0.531179	1	0			43833	RF	8445	1801	0.324453	1	0
120	RF	1051	910	0.426625	1	0			43834	RF	7866	1526	0.405057	1	0
121	RF	1257	836	0.539376	1	0			43835	RF	7930	1504	0.665792	1	0
122	RF	1343	996	0.319275	1	0			43836	RF	7931	1489	0.616597	1	0
123	RF	1408	914	0.758233	1	0			43837	RF	7941	1696	0.245235	1	0
124	RF	1432	899	0.686727	1	0			43838	RF	8048	1642	0.53141	1	0
125	RF	1492	844	0.548626	1	0			43839	RF	8052	1809	0.496945	1	0
126	RF	1533	919	0.561845	1	0			43840	RF	8076	1787	0.594512	1	0
127	RF	1570	837	0.564382	1	0			43841	RF	8080	1517	0.293557	1	0
128	RF	1606	856	0.472425	1	0			43842	RF	8087	1638	0.215355	1	0
129	RF	1607	932	0.284735	1	0			43843	RF	8100	1682	0.354192	1	0
130	RF	1666	980	0.567347	1	0			43844	RF	8101	1823	0.272941	1	0
131	RF	1682	763	0.609733	1	0			43845	RF	8118	1514	0.157637	1	0
132	RF	1690	785	0.124002	1	0			43846	RF	8132	1501	0.399817	1	0
133	RF	1738	778	0.620473	1	0			43847	RF	8134	1439	0.274666	1	0
134	RF	1778	920	0.617371	1	0			43848	RF	8158	1761	0.536622	1	0
135	RF	1785	842	0.795718	1	0			43849	RF	8158	1817	0.445841	1	0
136	RF	1815	866	0.473355	1	0			43850	RF	8159	1671	0.568972	1	0
137	RF	1842	930	0.439364	1	0			43851	RF	8169	1807	0.210324	1	0
138	RF	1849	827	0.122577	1	0			43852	RF	8172	1726	0.514024	1	0
139	RF	1866	990	0.439477	1	0			43853	RF	8179	1745	0.626842	1	0
140	RF	1868	833	0.288605	1	0			43854	RF	8231	1449	0.449032	1	0
141	RF	1889	974	0.371083	0	1			43855	RF	8253	1194	0.395066	1	0
142	RF	1933	889	0.235322	0	1			43856	RF	8295	1699	0.0997796	1	0
143	RF	1058	803	0.736741	1	0			43857	RF	8306	1401	0.351481	1	0
144	RF	1071	953	0.526434	1	0			43858	RF	8379	1415	0.177576	1	0
145	RF	1073	840	0.238751	0	1			43859	RF	8400	1452	0.493263	1	0
146	RF	1081	930	0.630859	1	0			43860	RF	8442	1637	0.122296	1	0
147	RF	1092	926	0.589066	1	0			43861	RF	8458	1325	0.447048	1	0
148	RF	1122	973	0.0401915	1	0			43862	RF	7879	1522	0.563434	1	0
149	RF	1144	930	0.556608	1	0			43863	RF	7900	1509	0.451447	1	0
150	RF	1185	874	0.480636	1	0			43864	RF	7911	1816	0.464665	1	0
151	RF	1252	942	0.627973	1	0			43865	RF	7944	1479	0.690835	1	0
152	RF	1287	886	0.710492	1	0			43866	RF	8002	1553	0.525718	1	0
153	RF	1333	944	0.34166	1	0			43867	RF	8028	1824	0.32171	1	0
154	RF	1366	846	0.522816	1	0			43868	RF	8074	1576	0.285496	1	0
155	RF	1366	951	0.556026	1	0			43869	RF	8094	1659	0.495551	1	0
156	RF	1405	969	0.361016	1	0			43870	RF	8100	1714	0.317553	1	0
157	RF	1433	986	0.726614	1	0			43871	RF	8108	1485	0.193238	1	0
158	RF	1446	931	0.639745	1	0			43872	RF	8119	1699	0.198851	1	0
159	RF	1475	841	0.630681	1	0			43873	RF	8177	1658	0.427926	1	0
160	RF	1492	909	0.731929	1	0			43874	RF	8207	1630	0.429432	1	0
161	RF	1557	850	0.72855	1	0			43875	RF	8240	1618	0.534225	1	0
162	RF	1562	807	0.511728	1	0			43876	RF	8252	1433	0.0352267	1	0
163	RF	1599	825	0.703028	1	0			43877	RF	8255	1643	0.507844	1	0
164	RF	1623	987	0.545015	1	0			43878	RF	8274	1509	0.880541	1	0
165	RF	1705	881	0.667419	1	0			43879	RF	8281	1629	0.439746	1	0
166	RF	1804	956	0.541151	1	0			43880	RF	8310	1761	0.188424	1	0
167	RF	1829	898	0.518478	1	0			43881	RF	8316	1807	0.368102	1	0
168	RF	1859	932	0.461846	1	0			43882	RF	8332	1132	0.437132	1	0
169	RF	1864	955	0.748644	1	0			43883	RF	8333	1511	0.303429	1	0
170	RF	1868	937	0.37994	1	0			43884	RF	8334	1166	0.537097	1	0
171	RF	1886	920	0.463028	1	0			43885	RF	8345	1105	0.317164	1	0
172	RF	1901	837	0.654188	1	0			43886	RF	8351	1147	0.252131	1	0
173	RF	1908	857	0.292923	1	0			43887	RF	8358	1772	0.50444	1	0
174	RF	1911	872	0.386525	1	0			43888	RF	8377	1473	0.357365	1	0
175	RF	1923	808	0.481133	1	0			43889	RF	8397	1832	0.37059	1	0
176	RF	992	916	0.539279	1	0			43890	RF	8423	1477	0.140775	1	0
177	RF	1056	964	0.268211	1	0			43891	RF	8445	1801	0.400383	1	0
178	RF	1069	939	0.565766	1	0			43892	RF	7949	1804	0.20206	1	0
179	RF	1087	990	0.76108	1	0			43893	RF	7981	1465	0.391792	1	0
180	RF	1091	854	0.417836	1	0			43894	RF	7983	1490	0.196639	1	0
181	RF	1206	899	0.785628	1	0			43895	RF	7996	1460	0.0490265	1	0
182	RF	1233	902	0.671599	1	0			43896	RF	8028	1779	0.160213	1	0
183	RF	1273	787	0.638529	1	0			43897	RF	8075	1396	0.420951	1	0
184	RF	1320	839	0.774655	1	0			43898	RF	8076	1439	0.470163	1	0
185	RF	1371	876	0.39593	1	0			43899	RF	8114	1717	0.382288	1	0
186	RF	1379	904	0.538388	1	0			43900	RF	8132	1501	0.452658	1	0
187	RF	1408	922	0.768967	1	0			43901	RF	8151	1479	0.287839	1	0
188	RF	1410	997	0.603667	1	0			43902	RF	8174	1547	0.441942	1	0
189	RF	1429	919	0.588499	1	0			43903	RF	8199	1675	0.14783	1	0
190	RF	1532	919	0.609104	1	0			43904	RF	8213	1797	0.359988	1	0
191	RF	1573	836	0.446905	1	0			43905	RF	8222	1626	0.325044	1	0
192	RF	1577	797	0.66471	1	0			43906	RF	8268	1649	0.0856956	1	0
193	RF	1592	991	0.299132	1	0			43907	RF	8279	1792	0.0859347	1	0
194	RF	1608	931	0.186977	1	0			43908	RF	8280	1689	0.146675	1	0
195	RF	1637	897	0.0702894	1	0			43909	RF	8280	1771	0.441753	1	0
196	RF	1682	761	0.691469	1	0			43910	RF	8324	1746	0.454887	1	0
197	RF	1715	860	0.651617	1	0			43911	RF	8336	1765	0.248514	1	0
198	RF	1723	789	0.774791	1	0			43912	RF	8341	1731	0.401913	1	0
199	RF	1764	830	0.755462	1	0			43913	RF	8346	1717	0.426302	1	0
200	RF	1776	758	0.593333	1	0			43914	RF	8350	1132	0.541099	1	0
201	RF	1812	926	0.617651	1	0			43915	RF	8351	1159	0.42532	1	0
202	RF	1845	894	0.62442	1	0			43916	RF	8360	1159	0.42892	1	0
203	RF	1861	871	0.682305	1	0			43917	RF	8374	1807	0.481365	1	0
204	RF	1877	950	0.481429	1	0			43918	RF	8376	1760	0.0423844	1	0
205	RF	1889	973	0.246521	0	1			43919	RF	8416	1536	0.295153	1	0
206	RF	988	973	0.533714	1	0			43920	RF	8422	1695	0.443776	1	0
207	RF	997	862	0.48517	1	0			43921	RF	8426	1752	0.0321197	1	0
208	RF	1082	983	0.81293	1	0			43922	RF	8449	1458	0.483245	1	0
209	RF	1125	962	0.499921	1	0			43923	RF	8457	1656	0.259887	1	0
210	RF	1151	778	0.121991	0	1			43924	RF	8461	1041	0.135899	1	0
211	RF	1203	867	0.562283	1	0			43925	RF	7930	1504	0.533917	1	0
212	RF	1274	833	0.337016	1	0			43926	RF	7933	1466	0.275953	1	0
213	RF	1309	819	0.466759	1	0			43927	RF	7938	1588	0.478088	1	0
214	RF	1314	911	0.626665	1	0			43928	RF	7965	1813	0.578748	1	0
215	RF	1345	880	0.581048	1	0			43929	RF	7977	1453	0.582896	1	0
216	RF	1362	926	0.358147	1	0			43930	RF	7988	1576	0.288362	1	0
217	RF	1371	951	0.438311	1	0			43931	RF	7992	1526	0.330578	1	0
218	RF	1384	932	0.432032	1	0			43932	RF	8014	1526	0.585402	1	0
219	RF	1404	970	0.451648	1	0			43933	RF	8030	1509	0.647069	1	0
220	RF	1425	973	0.65832	1	0			43934	RF	8035	1617	0.39657	1	0
221	RF	1491	910	0.655468	1	0			43935	RF	8071	1575	0.227236	1	0
222	RF	1491	932	0.0581993	1	0			43936	RF	8099	1714	0.161962	1	0
223	RF	1493	842	0.472219	1	0			43937	RF	8107	1439	0.259439	1	0
224	RF	1511	896	0.796836	1	0			43938	RF	8112	1833	0.450817	1	0
225	RF	1540	897	0.582468	1	0			43939	RF	8134	1440	0.261713	1	0
226	RF	1580	761	0.651803	1	0			43940	RF	8144	1256	0.552147	1	0
227	RF	1593	878	0.761281	1	0			43941	RF	8170	1808	0.226509	1	0
228	RF	1599	826	0.703037	1	0			43942	RF	8192	1654	0.550002	1	0
229	RF	1661	960	0.55688	1	0			43943	RF	8218	1761	0.677364	1	0
230	RF	1869	929	0.508208	1	0			43944	RF	8241	1577	0.497557	1	0
231	RF	1923	808	0.450989	1	0			43945	RF	8293	1562	0.173965	1	0
232	RF	1889	860	0.611104	1	0			43946	RF	8301	1137	0.25982	1	0
233	RF	1951	784	0.395129	1	0			43947	RF	8303	1426	0.344592	1	0
234	RF	2073	904	0.677141	1	0			43948	RF	8307	1705	0.156359	1	0
235	RF	2105	810	0.686315	1	0			43949	RF	8340	1476	0.0885953	1	0
236	RF	2137	745	0.757929	1	0			43950	RF	8379	1434	0.282726	1	0
237	RF	2153	933	0.726119	1	0			43951	RF	8385	1783	0.551951	1	0
238	RF	2161	924	0.727965	1	0			43952	RF	8407	1777	0.284094	1	0
239	RF	2308	845	0.712021	1	0			43953	RF	8415	1126	0.464687	1	0
240	RF	2371	829	0.573603	1	0			43954	RF	7928	1818	0.693297	1	0
241	RF	2408	933	0.250487	1	0			43955	RF	7962	1677	0.202624	1	0
242	RF	2414	947	0.550795	1	0			43956	RF	8035	1501	0.566254	1	0
243	RF	2443	962	0.452634	1	0			43957	RF	8057	1826	0.232768	1	0
244	RF	2510	896	0.776486	1	0			43958	RF	8078	1720	0.198191	1	0
245	RF	2549	937	0.558199	1	0			43959	RF	8084	1652	0.273649	1	0
246	RF	2560	772	0.202329	0	1			43960	RF	8120	1818	0.340012	1	0
247	RF	2561	934	0.621765	1	0			43961	RF	8162	1801	0.47186	1	0
248	RF	2570	792	0.59262	1	0			43962	RF	8176	1232	0.442227	1	0
249	RF	2590	956	0.467532	1	0			43963	RF	8189	1801	0.368083	1	0
250	RF	2611	704	0.675697	1	0			43964	RF	8204	1231	0.441017	1	0
251	RF	2613	915	0.505746	1	0			43965	RF	8221	1653	0.149878	1	0
252	RF	2628	728	0.320156	1	0			43966	RF	8271	1195	0.206174	1	0
253	RF	2642	867	0.624484	1	0			43967	RF	8307	1482	0.185357	1	0
254	RF	2645	887	0.590784	1	0			43968	RF	8331	1821	0.616586	1	0
255	RF	2659	804	0.576032	1	0			43969	RF	8370	1140	0.355675	1	0
256	RF	2698	886	0.513245	1	0			43970	RF	8371	1416	0.0537161	1	0
257	RF	2776	828	0.682234	1	0			43971	RF	8380	1131	0.292767	1	0
258	RF	2804	743	0.364998	1	0			43972	RF	8450	1549	0.480247	1	0
259	RF	2814	743	0.723199	1	0			43973	RF	8454	1486	0.512932	1	0
260	RF	2816	716	0.715665	1	0			43974	RF	8456	1655	0.253688	1	0
261	RF	2817	849	0.558328	0	1			43975	RF	8502	1741	0.79548	1	0
262	RF	2003	731	0.626584	1	0			43976	RF	8627	984	0.446125	1	0
263	RF	2115	811	0.684631	1	0			43977	RF	8773	899	0.704243	1	0
264	RF	2176	969	0.488919	1	0			43978	RF	8407	1800	0.343252	1	0
265	RF	2276	966	0.631679	1	0			43979	RF	8417	1427	0.229314	1	0
266	RF	2282	911	0.794779	1	0			43980	RF	8443	1527	0.322839	1	0
267	RF	2381	731	0.420989	1	0			43981	RF	8461	1544	0.174599	1	0
268	RF	2397	719	0.79939	1	0			43982	RF	8467	1749	0.217044	1	0
269	RF	2402	947	0.197978	0	1			43983	RF	8468	1680	0.484448	1	0
270	RF	2458	779	0.691498	1	0			43984	RF	8474	1430	0.296462	1	0
271	RF	2476	723	0.595368	1	0			43985	RF	8483	1805	0.446883	1	0
272	RF	2520	744	0.567836	1	0			43986	RF	8488	1170	0.63017	1	0
273	RF	2537	752	0.47662	1	0			43987	RF	8495	1824	0.478893	1	0
274	RF	2626	799	0.507267	1	0			43988	RF	8507	1155	0.0713135	1	0
275	RF	2626	921	0.80631	1	0			43989	RF	8522	1793	0.548703	1	0
276	RF	2660	839	0.559365	1	0			43990	RF	8536	1527	0.437052	1	0
277	RF	2662	729	0.700349	1	0			43991	RF	8541	1393	0.366473	1	0
278	RF	2703	970	0.50898	1	0			43992	RF	8566	1295	0.275992	1	0
279	RF	2715	819	0.700714	1	0			43993	RF	8571	1525	0.19394	1	0
280	RF	2746	854	0.531866	1	0			43994	RF	8572	1433	0.501038	1	0
281	RF	2785	966	0.628395	1	0			43995	RF	8575	1652	0.486484	1	0
282	RF	2825	792	0.478916	1	0			43996	RF	8579	1375	0.243551	1	0
283	RF	2833	946	0.609012	1	0			43997	RF	8589	1195	0.494282	1	0
284	RF	2859	815	0.596837	1	0			43998	RF	8593	1462	0.329424	1	0
285	RF	1890	974	0.365822	0	1			43999	RF	8599	932	0.399068	1	0
286	RF	1909	857	0.36498	1	0			44000	RF	8601	1179	0.650315	1	0
287	RF	1942	908	0.544623	1	0			44001	RF	8601	1636	0.568833	1	0
288	RF	1956	959	0.57834	1	0			44002	RF	8602	1664	0.414111	1	0
289	RF	1968	921	0.295506	0	1			44003	RF	8608	1684	0.369594	1	0
290	RF	2006	927	0.502592	1	0			44004	RF	8615	1617	0.377098	1	0
291	RF	2071	800	0.516777	1	0			44005	RF	8621	1200	0.677551	1	0
292	RF	2093	803	0.569814	1	0			44006	RF	8622	867	0.229835	1	0
293	RF	2162	924	0.713747	1	0			44007	RF	8636	1239	0.395394	1	0
294	RF	2246	938	0.593771	1	0			44008	RF	8637	1353	0.302168	1	0
295	RF	2291	955	0.37955	1	0			44009	RF	8643	879	0.106258	1	0
296	RF	2308	845	0.751496	1	0			44010	RF	8651	1127	0.473795	1	0
297	RF	2339	955	0.748442	1	0			44011	RF	8663	1071	0.523419	1	0
298	RF	2400	785	0.43635	1	0			44012	RF	8667	1499	0.516407	1	0
299	RF	2440	741	0.674609	1	0			44013	RF	8668	1731	0.557898	1	0
300	RF	2449	781	0.539888	1	0			44014	RF	8669	1267	0.633032	1	0
301	RF	2467	775	0.681068	1	0			44015	RF	8672	1816	0.445731	1	0
302	RF	2480	771	0.630411	1	0			44016	RF	8687	982	0.313993	1	0
303	RF	2486	740	0.581141	1	0			44017	RF	8689	1466	0.457735	1	0
304	RF	2497	916	0.866551	1	0			44018	RF	8697	962	0.518525	1	0
305	RF	2530	819	0.549979	1	0			44019	RF	8709	932	0.65168	1	0
306	RF	2541	723	0.524002	1	0			44020	RF	8710	1341	0.465161	1	0
307	RF	2560	772	0.176597	0	1			44021	RF	8711	951	0.143936	1	0
308	RF	2562	893	0.748659	1	0			44022	RF	8711	1134	0.226852	1	0
309	RF	2585	922	0.616897	1	0			44023	RF	8736	1095	0.544561	1	0
310	RF	2590	956	0.462129	1	0			44024	RF	8741	1397	0.748647	1	0
311	RF	2617	815	0.527464	1	0			44025	RF	8396	1787	0.211748	1	0
312	RF	2698	887	0.417706	1	0			44026	RF	8400	1420	0.235411	1	0
313	RF	2712	741	0.709483	1	0			44027	RF	8403	1453	0.447239	1	0
314	RF	2721	709	0.526937	1	0			44028	RF	8421	1794	0.243884	1	0
315	RF	2729	807	0.532108	1	0			44029	RF	8423	1724	0.480944	1	0
316	RF	2784	841	0.714312	1	0			44030	RF	8436	1313	0.165248	1	0
317	RF	2800	703	0.628219	1	0			44031	RF	8448	1409	0.244589	1	0
318	RF	2816	715	0.641637	1	0			44032	RF	8465	1150	0.404191	1	0
319	RF	2827	811	0.581812	1	0			44033	RF	8467	1077	0.373994	1	0
320	RF	2875	799	0.508191	1	0			44034	RF	8479	1821	0.308384	1	0
321	RF	1888	861	0.569922	1	0			44035	RF	8495	1615	0.522283	1	0
322	RF	1960	780	0.512501	1	0			44036	RF	8500	1099	0.392488	1	0
323	RF	1963	974	0.0274754	1	0			44037	RF	8499	1228	0.428918	1	0
324	RF	2001	807	0.474136	1	0			44038	RF	8504	1181	0.249224	1	0
325	RF	2098	886	0.0905993	0	1			44039	RF	8515	1777	0.355101	1	0
326	RF	2113	810	0.629324	1	0			44040	RF	8518	1567	0.198198	1	0
327	RF	2127	724	0.646839	1	0			44041	RF	8517	1706	0.360741	1	0
328	RF	2156	935	0.497931	1	0			44042	RF	8518	1320	0.345509	1	0
329	RF	2270	933	0.625961	1	0			44043	RF	8520	1306	0.310519	1	0
330	RF	2396	812	0.680005	1	0			44044	RF	8521	1813	0.74837	1	0
331	RF	2449	749	0.596761	1	0			44045	RF	8530	1511	0.232474	1	0
332	RF	2452	760	0.692478	1	0			44046	RF	8541	1731	0.291314	1	0
333	RF	2452	890	0.506605	1	0			44047	RF	8554	930	0.425678	1	0
334	RF	2506	813	0.672305	1	0			44048	RF	8566	1795	0.325929	1	0
335	RF	2512	900	0.778347	1	0			44049	RF	8574	1635	0.788863	1	0
336	RF	2520	743	0.450341	1	0			44050	RF	8580	1255	0.166068	1	0
337	RF	2549	937	0.367882	1	0			44051	RF	8583	924	0.145258	1	0
338	RF	2569	792	0.521775	1	0			44052	RF	8585	1501	0.455463	1	0
339	RF	2620	848	0.698938	1	0			44053	RF	8585	1559	0.696987	1	0
340	RF	2759	853	0.338348	1	0			44054	RF	8589	1688	0.418264	1	0
341	RF	2770	781	0.621151	1	0			44055	RF	8605	1718	0.239971	1	0
342	RF	2782	771	0.808856	1	0			44056	RF	8610	1078	0.281098	1	0
343	RF	2815	743	0.651937	1	0			44057	RF	8612	1532	0.81135	1	0
344	RF	2831	787	0.332178	1	0			44058	RF	8618	1260	0.595928	1	0
345	RF	2851	801	0.579015	1	0			44059	RF	8630	1160	0.379362	1	0
346	RF	1909	857	0.282983	1	0			44060	RF	8645	1289	0.585446	1	0
347	RF	1923	806	0.506745	1	0			44061	RF	8650	1549	0.564877	1	0
348	RF	1931	887	0.206978	0	1			44062	RF	8664	1298	0.477369	1	0
349	RF	1968	921	0.207412	0	1			44063	RF	8667	1384	0.635512	1	0
350	RF	1978	745	0.518966	1	0			44064	RF	8682	1799	0.621358	1	0
351	RF	1989	805	0.548529	1	0			44065	RF	8692	1304	0.343897	1	0
352	RF	2030	751	0.333017	1	0			44066	RF	8694	842	0.108626	1	0
353	RF	2048	780	0.712664	1	0			44067	RF	8709	1364	0.593339	1	0
354	RF	2105	810	0.62218	1	0			44068	RF	8711	1226	0.65485	1	0
355	RF	2134	743	0.811369	1	0			44069	RF	8735	1264	0.446028	1	0
356	RF	2171	822	0.703272	1	0			44070	RF	8737	1315	0.469456	1	0
357	RF	2193	837	0.567532	1	0			44071	RF	8752	1385	0.50353	1	0
358	RF	2220	952	0.508149	1	0			44072	RF	8754	1736	0.819875	1	0
359	RF	2252	975	0.65974	1	0			44073	RF	8841	1144	0.501582	0	1
360	RF	2293	912	0.713351	1	0			44074	RF	8429	1685	0.673699	1	0
361	RF	2308	962	0.501696	1	0			44075	RF	8462	1089	0.553811	1	0
362	RF	2426	823	0.728199	1	0			44076	RF	8467	1393	0.173722	1	0
363	RF	2468	794	0.676321	1	0			44077	RF	8474	1430	0.221349	1	0
364	RF	2486	741	0.526168	1	0			44078	RF	8476	1557	0.259978	1	0
365	RF	2512	797	0.646723	1	0			44079	RF	8491	1732	0.479704	1	0
366	RF	2528	754	0.562271	1	0			44080	RF	8496	1677	0.462629	1	0
367	RF	2556	829	0.632916	1	0			44081	RF	8507	1487	0.647656	1	0
368	RF	2562	895	0.621621	1	0			44082	RF	8524	1370	0.582256	1	0
369	RF	2617	816	0.615784	1	0			44083	RF	8538	1785	0.641437	1	0
370	RF	2623	727	0.500567	1	0			44084	RF	8550	1362	0.283353	1	0
371	RF	2642	701	0.557456	1	0			44085	RF	8566	1296	0.201726	1	0
372	RF	2667	882	0.557069	1	0			44086	RF	8569	1821	0.459898	1	0
373	RF	2675	826	0.67394	1	0			44087	RF	8575	1652	0.638566	1	0
374	RF	2707	883	0.71131	1	0			44088	RF	8585	1003	0.51645	1	0
375	RF	2712	741	0.6448	1	0			44089	RF	8589	1195	0.430774	1	0
376	RF	2747	765	0.587223	1	0			44090	RF	8597	1499	0.262549	1	0
377	RF	2748	834	0.598105	1	0			44091	RF	8606	1429	0.603264	1	0
378	RF	2788	794	0.358217	1	0			44092	RF	8609	1628	0.283377	1	0
379	RF	2840	768	0.597175	1	0			44093	RF	8615	1617	0.21679	1	0
380	RF	2875	800	0.508954	1	0			44094	RF	8627	1812	0.28745	1	0
381	RF	1890	973	0.243491	0	1			44095	RF	8629	1143	0.474265	1	0
382	RF	1902	837	0.545074	1	0			44096	RF	8632	923	0.252229	1	0
383	RF	1912	871	0.4642	1	0			44097	RF	8638	1408	0.517115	1	0
384	RF	1955	959	0.628645	1	0			44098	RF	8650	1128	0.449929	1	0
385	RF	2067	958	0.427861	1	0			44099	RF	8680	1519	0.713091	1	0
386	RF	2096	763	0.723119	1	0			44100	RF	8680	1347	0.530873	1	0
387	RF	2101	922	0.529865	1	0			44101	RF	8685	1481	0.697349	1	0
388	RF	2213	843	0.532839	1	0			44102	RF	8700	1018	0.594594	1	0
389	RF	2254	805	0.275297	1	0			44103	RF	8703	907	0.598432	1	0
390	RF	2280	799	0.686033	1	0			44104	RF	8704	1502	0.490402	1	0
391	RF	2314	718	0.311949	0	1			44105	RF	8706	1280	0.540955	1	0
392	RF	2334	886	0.500598	1	0			44106	RF	8712	1480	0.284389	1	0
393	RF	2352	960	0.662638	1	0			44107	RF	8713	1082	0.546481	1	0
394	RF	2366	875	0.741138	1	0			44108	RF	8746	1063	0.412729	1	0
395	RF	2439	844	0.472696	1	0			44109	RF	8747	923	0.0798981	1	0
396	RF	2450	749	0.598256	1	0			44110	RF	8765	1388	0.603754	1	0
397	RF	2451	891	0.467148	1	0			44111	RF	8781	1405	0.325284	1	0
398	RF	2459	794	0.709365	1	0			44112	RF	8787	1294	0.00909506	1	0
399	RF	2479	753	0.6596	1	0			44113	RF	8442	1636	0.134722	1	0
400	RF	2508	754	0.589801	1	0			44114	RF	8448	1410	0.29479	1	0
401	RF	2511	840	0.673021	1	0			44115	RF	8486	1281	0.24024	1	0
402	RF	2537	786	0.631719	1	0			44116	RF	8493	1163	0.447163	1	0
403	RF	2539	918	0.6601	1	0			44117	RF	8507	1163	0.150369	1	0
404	RF	2584	824	0.698873	1	0			44118	RF	8513	1119	0.261219	1	0
405	RF	2587	859	0.53199	1	0			44119	RF	8515	1478	0.307733	1	0
406	RF	2625	916	0.621088	1	0			44120	RF	8519	1628	0.103099	1	0
407	RF	2625	960	0.650306	1	0			44121	RF	8542	1454	0.105189	1	0
408	RF	2643	736	0.455928	1	0			44122	RF	8544	1807	0.34398	1	0
409	RF	2647	859	0.647555	1	0			44123	RF	8558	1603	0.391734	1	0
410	RF	2678	887	0.703351	1	0			44124	RF	8573	1432	0.518628	1	0
411	RF	2682	753	0.598512	1	0			44125	RF	8579	1376	0.306061	1	0
412	RF	2716	819	0.682981	1	0			44126	RF	8584	1460	0.401255	1	0
413	RF	2759	854	0.288726	1	0			44127	RF	8596	1234	0.437889	1	0
414	RF	2767	937	0.544217	1	0			44128	RF	8596	1458	0.378539	1	0
415	RF	2769	780	0.565916	1	0			44129	RF	8600	1367	0.329527	1	0
416	RF	2774	814	0.540377	1	0			44130	RF	8602	1572	0.48889	1	0
417	RF	2840	803	0.739017	1	0			44131	RF	8610	1078	0.224818	1	0
418	RF	2859	814	0.598112	1	0			44132	RF	8611	1531	0.743139	1	0
419	RF	2864	793	0.676452	1	0			44133	RF	8640	1650	0.765696	1	0
420	RF	2864	748	0.407331	1	0			44134	RF	8640	1711	0.645181	1	0
421	RF	1890	918	0.407156	1	0			44135	RF	8640	1737	0.662021	1	0
422	RF	1922	807	0.459396	1	0			44136	RF	8644	1666	0.656668	1	0
423	RF	1970	952	0.386158	1	0			44137	RF	8647	1509	0.635946	1	0
424	RF	1979	745	0.514355	1	0			44138	RF	8652	938	0.369413	1	0
425	RF	2026	768	0.130581	0	1			44139	RF	8656	1074	0.535015	1	0
426	RF	2040	756	0.619807	1	0			44140	RF	8665	1385	0.650325	1	0
427	RF	2049	780	0.685627	1	0			44141	RF	8669	1732	0.482312	1	0
428	RF	2101	812	0.687438	1	0			44142	RF	8677	1053	0.427276	1	0
429	RF	2128	725	0.649699	1	0			44143	RF	8679	1628	0.573554	1	0
430	RF	2130	761	0.330023	1	0			44144	RF	8703	843	0.362506	1	0
431	RF	2139	844	0.135069	0	1			44145	RF	8706	878	0.353934	1	0
432	RF	2192	836	0.546979	1	0			44146	RF	8709	1204	0.578891	1	0
433	RF	2255	900	0.650084	1	0			44147	RF	8713	995	0.310567	1	0
434	RF	2290	895	0.659508	1	0			44148	RF	8713	1434	0.450087	1	0
435	RF	2290	911	0.743888	1	0			44149	RF	8734	836	0.61199	1	0
436	RF	2322	872	0.538187	1	0			44150	RF	8737	1315	0.346517	1	0
437	RF	2431	828	0.687856	1	0			44151	RF	8740	1359	0.463248	1	0
438	RF	2469	836	0.635566	1	0			44152	RF	8755	1343	0.480005	1	0
439	RF	2492	763	0.631978	1	0			44153	RF	8810	1276	0.745726	1	0
440	RF	2501	761	0.50723	1	0			44154	RF	8444	1801	0.425214	1	0
441	RF	2505	811	0.418419	1	0			44155	RF	8458	1325	0.439933	1	0
442	RF	2555	827	0.584728	1	0			44156	RF	8461	1089	0.540728	1	0
443	RF	2559	913	0.733679	1	0			44157	RF	8515	1510	0.614747	1	0
444	RF	2603	838	0.521024	1	0			44158	RF	8533	1497	0.593458	1	0
445	RF	2617	819	0.7334	1	0			44159	RF	8534	1222	0.505309	1	0
446	RF	2624	845	0.727315	1	0			44160	RF	8537	1357	0.346371	1	0
447	RF	2634	800	0.552836	1	0			44161	RF	8538	1781	0.492939	1	0
448	RF	2664	715	0.455091	1	0			44162	RF	8541	1748	0.348115	1	0
449	RF	2685	828	0.711727	1	0			44163	RF	8550	1362	0.208826	1	0
450	RF	2702	883	0.645318	1	0			44164	RF	8555	1291	0.26353	1	0
451	RF	2715	744	0.668758	1	0			44165	RF	8560	1477	0.41663	1	0
452	RF	2724	718	0.437194	1	0			44166	RF	8575	1651	0.562487	1	0
453	RF	2735	730	0.420512	1	0			44167	RF	8587	1810	0.373094	1	0
454	RF	2778	842	0.595392	1	0			44168	RF	8595	1530	0.523405	1	0
455	RF	2817	815	0.690398	1	0			44169	RF	8600	942	0.270291	1	0
456	RF	2816	836	0.901995	1	0			44170	RF	8601	1260	0.301297	1	0
457	RF	2826	953	0.543556	1	0			44171	RF	8605	1200	0.292924	1	0
458	RF	2830	787	0.4322	1	0			44172	RF	8608	986	0.314288	1	0
459	RF	2833	738	0.500984	1	0			44173	RF	8608	1744	0.282333	1	0
460	RF	2847	820	0.743597	1	0			44174	RF	8608	1815	0.499523	1	0
461	RF	2858	931	0.568877	1	0			44175	RF	8610	1628	0.382607	1	0
462	RF	1889	873	0.628004	1	0			44176	RF	8614	1616	0.211454	1	0
463	RF	1904	936	0.449974	1	0			44177	RF	8615	1261	0.290021	1	0
464	RF	1980	773	0.545821	1	0			44178	RF	8617	1468	0.70064	1	0
465	RF	2007	922	0.64882	1	0			44179	RF	8626	1441	0.417098	1	0
466	RF	2095	764	0.742647	1	0			44180	RF	8629	939	0.512331	1	0
467	RF	2187	849	0.402127	0	1			44181	RF	8635	1213	0.446506	1	0
468	RF	2189	794	0.660078	1	0			44182	RF	8639	1461	0.524912	1	0
469	RF	2212	967	0.690649	1	0			44183	RF	8641	1327	0.535478	1	0
470	RF	2417	950	0.594032	1	0			44184	RF	8644	1769	0.496172	1	0
471	RF	2438	721	0.334466	1	0			44185	RF	8645	1817	0.264985	1	0
472	RF	2438	845	0.537782	1	0			44186	RF	8654	1547	0.505859	1	0
473	RF	2468	897	0.568307	1	0			44187	RF	8654	1565	0.491429	1	0
474	RF	2491	951	0.40027	1	0			44188	RF	8662	1755	0.647217	1	0
475	RF	2521	851	0.577154	1	0			44189	RF	8693	962	0.341403	1	0
476	RF	2542	895	0.690779	1	0			44190	RF	8693	1674	0.607557	1	0
477	RF	2573	833	0.509357	1	0			44191	RF	8702	1156	0.256458	1	0
478	RF	2581	883	0.522768	1	0			44192	RF	8705	1251	0.409202	1	0
479	RF	2582	838	0.505411	1	0			44193	RF	8710	1157	0.340985	1	0
480	RF	2582	895	0.448879	1	0			44194	RF	8720	1398	0.554601	1	0
481	RF	2614	899	0.527859	1	0			44195	RF	8735	1081	0.479621	1	0
482	RF	2642	702	0.542767	1	0			44196	RF	8740	1735	0.666291	1	0
483	RF	2649	911	0.563351	1	0			44197	RF	8747	923	0.0488345	1	0
484	RF	2770	707	0.385065	1	0			44198	RF	8765	1389	0.567046	1	0
485	RF	2792	871	0.554909	1	0			44199	RF	8409	1777	0.271521	1	0
486	RF	2835	918	0.557813	1	0			44200	RF	8423	1696	0.441415	1	0
487	RF	2847	760	0.724015	1	0			44201	RF	8456	1374	0.370283	1	0
488	RF	2859	812	0.697782	1	0			44202	RF	8470	1353	0.345272	1	0
489	RF	2863	749	0.425324	1	0			44203	RF	8477	1154	0.284149	1	0
490	RF	2878	771	0.651249	1	0			44204	RF	8488	1751	0.500089	1	0
491	RF	2803	704	0.495737	1	0			44205	RF	8489	1708	0.13317	1	0
492	RF	2815	743	0.682473	1	0			44206	RF	8490	1368	0.359208	1	0
493	RF	2817	716	0.692285	1	0			44207	RF	8491	1733	0.465805	1	0
494	RF	2826	793	0.523485	1	0			44208	RF	8499	1737	0.563086	1	0
495	RF	2833	946	0.620679	1	0			44209	RF	8505	1165	0.202352	1	0
496	RF	2944	742	0.535714	1	0			44210	RF	8516	1188	0.346212	1	0
497	RF	2998	784	0.612198	1	0			44211	RF	8521	1652	0.478503	1	0
498	RF	3070	870	0.628028	1	0			44212	RF	8535	1533	0.179832	1	0
499	RF	3191	932	0.835043	1	0			44213	RF	8543	1525	0.251674	1	0
500	RF	3210	668	0.561277	1	0			44214	RF	8544	1311	0.520329	1	0
501	RF	3286	892	0.42706	1	0			44215	RF	8554	1440	0.560318	1	0
502	RF	3291	949	0.459618	1	0			44216	RF	8560	1408	0.22984	1	0
503	RF	3368	903	0.68562	1	0			44217	RF	8562	1497	0.39895	1	0
504	RF	3421	891	0.597726	1	0			44218	RF	8572	1443	0.600133	1	0
505	RF	3472	810	0.676216	1	0			44219	RF	8572	1637	0.714555	1	0
506	RF	3575	845	0.432054	1	0			44220	RF	8583	1774	0.322548	1	0
507	RF	3577	667	0.126733	0	1			44221	RF	8583	1499	0.634645	1	0
508	RF	3583	959	0.497456	1	0			44222	RF	8587	1243	0.307486	1	0
509	RF	3591	845	0.82346	1	0			44223	RF	8589	1717	0.395114	1	0
510	RF	3615	844	0.399669	1	0			44224	RF	8591	1225	0.418947	1	0
511	RF	3637	968	0.514194	1	0			44225	RF	8602	1573	0.471344	1	0
512	RF	3681	720	0.760753	1	0			44226	RF	8603	1640	0.324516	1	0
513	RF	3750	769	0.585499	1	0			44227	RF	8611	1185	0.0227772	1	0
514	RF	3751	896	0.397468	0	1			44228	RF	8614	1295	0.701838	1	0
515	RF	3788	797	0.453085	1	0			44229	RF	8615	1454	0.443641	1	0
516	RF	2872	799	0.44043	1	0			44230	RF	8625	1351	0.18642	1	0
517	RF	2886	961	0.01	0	1			44231	RF	8642	1268	0.549782	1	0
518	RF	2910	716	0.434523	1	0			44232	RF	8650	1459	0.674418	1	0
519	RF	2913	769	0.60253	1	0			44233	RF	8667	1403	0.181441	1	0
520	RF	2913	784	0.624473	1	0			44234	RF	8684	1713	0.530722	1	0
521	RF	2920	682	0.39594	1	0			44235	RF	8706	879	0.372328	1	0
522	RF	2964	705	0.361855	1	0			44236	RF	8706	1427	0.434696	1	0
523	RF	2969	758	0.635342	1	0			44237	RF	8708	1083	0.413601	1	0
524	RF	3012	696	0.780593	1	0			44238	RF	8712	1030	0.470005	1	0
525	RF	3066	689	0.667173	1	0			44239	RF	8712	1522	0.82531	1	0
526	RF	3073	857	0.774155	1	0			44240	RF	8742	1094	0.707255	1	0
527	RF	3080	876	0.400466	1	0			44241	RF	8755	1133	0.680972	1	0
528	RF	3095	855	0.641978	1	0			44242	RF	8416	1128	0.330575	1	0
529	RF	3335	887	0.631997	1	0			44243	RF	8425	1752	0.0125944	1	0
530	RF	3349	871	0.486804	1	0			44244	RF	8449	1459	0.389528	1	0
531	RF	3393	896	0.700806	1	0			44245	RF	8459	1043	0.210312	1	0
532	RF	3404	907	0.704528	1	0			44246	RF	8477	1265	0.323797	1	0
533	RF	3453	911	0.848141	1	0			44247	RF	8477	1710	0.199313	1	0
534	RF	3470	779	0.614906	1	0			44248	RF	8494	1193	0.382995	1	0
535	RF	3486	797	0.65696	1	0			44249	RF	8496	1683	0.414673	1	0
536	RF	3701	872	0.336398	1	0			44250	RF	8499	1267	0.269767	1	0
537	RF	3718	800	0.76585	1	0			44251	RF	8499	1577	0.0443844	1	0
538	RF	3727	774	0.491092	1	0			44252	RF	8507	1485	0.341919	1	0
539	RF	3762	943	0.633869	1	0			44253	RF	8509	1786	0.467912	1	0
540	RF	3781	787	0.633012	1	0			44254	RF	8514	1510	0.58193	1	0
541	RF	3793	871	0.225716	1	0			44255	RF	8517	1327	0.216052	1	0
542	RF	2802	704	0.538	1	0			44256	RF	8540	1454	0.0592021	1	0
543	RF	2815	744	0.640711	1	0			44257	RF	8559	1603	0.210532	1	0
544	RF	2825	790	0.457603	1	0			44258	RF	8566	1726	0.434365	1	0
545	RF	2856	816	0.530801	1	0			44259	RF	8569	1211	0.499187	1	0
546	RF	2882	769	0.607823	1	0			44260	RF	8587	1432	0.581208	1	0
547	RF	2891	936	0.478204	0	1			44261	RF	8591	1405	0.503186	1	0
548	RF	2984	719	0.794716	1	0			44262	RF	8603	988	0.233514	1	0
549	RF	3013	787	0.588051	1	0			44263	RF	8609	1755	0.187384	1	0
550	RF	3017	719	0.786597	1	0			44264	RF	8615	1112	0.334861	1	0
551	RF	3026	863	0.544713	1	0			44265	RF	8617	1571	0.38873	1	0
552	RF	3190	848	0.835605	1	0			44266	RF	8624	1423	0.490822	1	0
553	RF	3237	952	0.724005	1	0			44267	RF	8631	1508	0.404149	1	0
554	RF	3370	903	0.639267	1	0			44268	RF	8634	1710	0.588726	1	0
555	RF	3422	890	0.508963	1	0			44269	RF	8635	1647	0.694484	1	0
556	RF	3461	843	0.652304	1	0			44270	RF	8650	1323	0.410101	1	0
557	RF	3480	842	0.83767	1	0			44271	RF	8651	1338	0.321433	1	0
558	RF	3624	763	0.556764	1	0			44272	RF	8656	1297	0.431894	1	0
559	RF	3637	969	0.415788	1	0			44273	RF	8661	1710	0.364716	1	0
560	RF	3647	890	0.561462	1	0			44274	RF	8664	1602	0.569313	1	0
561	RF	3663	801	0.649227	1	0			44275	RF	8667	995	0.216863	1	0
562	RF	3682	719	0.745544	1	0			44276	RF	8671	1201	0.567583	1	0
563	RF	3722	781	0.275607	1	0			44277	RF	8702	1157	0.155495	1	0
564	RF	3723	964	0.603449	1	0			44278	RF	8716	1339	0.613629	1	0
565	RF	3764	787	0.706942	1	0			44279	RF	8720	1810	0.813454	1	0
566	RF	2825	811	0.636751	1	0			44280	RF	8743	1733	0.677197	1	0
567	RF	2850	800	0.591364	1	0			44281	RF	8407	1777	0.32691	1	0
568	RF	2862	795	0.58493	1	0			44282	RF	8417	1537	0.238735	1	0
569	RF	2889	809	0.743609	1	0			44283	RF	8455	1656	0.290042	1	0
570	RF	2928	875	0.612486	1	0			44284	RF	8461	1789	0.475069	1	0
571	RF	2936	776	0.659884	1	0			44285	RF	8469	1307	0.484202	1	0
572	RF	3001	726	0.765423	1	0			44286	RF	8471	1353	0.233676	1	0
573	RF	3045	863	0.564437	1	0			44287	RF	8470	1619	0.128308	1	0
574	RF	3250	888	0.735183	1	0			44288	RF	8475	1435	0.132362	1	0
575	RF	3315	709	0.568561	1	0			44289	RF	8477	1152	0.340296	1	0
576	RF	3331	913	0.720415	1	0			44290	RF	8486	1466	0.352528	1	0
577	RF	3340	753	0.536432	0	1			44291	RF	8489	1706	0.0714038	1	0
578	RF	3393	896	0.523084	1	0			44292	RF	8491	1734	0.440433	1	0
579	RF	3407	873	0.460134	0	1			44293	RF	8494	1641	0.201212	1	0
580	RF	3449	859	0.575086	1	0			44294	RF	8542	1776	0.532809	1	0
581	RF	3579	788	0.158728	0	1			44295	RF	8562	1496	0.363206	1	0
582	RF	3701	953	0.688582	1	0			44296	RF	8574	1627	0.659191	1	0
583	RF	3762	942	0.660322	1	0			44297	RF	8577	1434	0.46286	1	0
584	RF	3793	871	0.159434	1	0			44298	RF	8590	1609	0.530848	1	0
585	RF	2804	704	0.46264	1	0			44299	RF	8598	1638	0.400466	1	0
586	RF	2831	787	0.472656	1	0			44300	RF	8609	1235	0.602831	1	0
587	RF	2839	737	0.44136	1	0			44301	RF	8614	1616	0.218637	1	0
588	RF	2848	819	0.586021	1	0			44302	RF	8616	1808	0.606089	1	0
589	RF	2859	814	0.47889	1	0			44303	RF	8621	1738	0.239029	1	0
590	RF	2874	799	0.413208	1	0			44304	RF	8642	1434	0.211983	1	0
591	RF	2887	960	0.01	0	1			44305	RF	8652	1408	0.179247	1	0
592	RF	2920	734	0.424819	1	0			44306	RF	8656	1192	0.374337	1	0
593	RF	2975	863	0.58083	0	1			44307	RF	8673	1084	0.358586	1	0
594	RF	2984	915	0.704595	1	0			44308	RF	8691	1022	0.0363906	1	0
595	RF	2992	925	0.818839	1	0			44309	RF	8701	1177	0.483505	1	0
596	RF	3013	786	0.575387	1	0			44310	RF	8701	1368	0.579945	1	0
597	RF	3014	718	0.717716	1	0			44311	RF	8714	1198	0.40311	1	0
598	RF	3020	685	0.747598	1	0			44312	RF	8717	1827	0.929722	1	0
599	RF	3041	738	0.869007	1	0			44313	RF	8719	1373	0.484041	1	0
600	RF	3056	942	0.467011	1	0			44314	RF	8727	1431	0.518835	1	0
601	RF	3124	685	0.0141401	0	1			44315	RF	8771	1702	0.812624	1	0
602	RF	3311	890	0.696877	1	0			44316	RF	8817	1386	0.306994	0	1
603	RF	3336	888	0.652179	1	0			44317	RF	8829	1121	0.449583	1	0
604	RF	3348	871	0.327361	1	0			44318	RF	7414	2648	0.579479	1	0
605	RF	3425	886	0.394006	1	0			44319	RF	7309	2484	0.592237	1	0
606	RF	3503	833	0.749734	1	0			44320	RF	7309	2715	0.841489	1	0
607	RF	3531	693	0.530737	1	0			44321	RF	7350	2499	0.511275	1	0
608	RF	3645	890	0.504949	1	0			44322	RF	7381	2596	0.704662	1	0
609	RF	3708	747	0.634816	1	0			44323	RF	7451	2577	0.661313	1	0
610	RF	3713	809	0.848468	1	0			44324	RF	7460	2584	0.588223	1	0
611	RF	3723	963	0.569636	1	0			44325	RF	7471	2399	0.469958	1	0
612	RF	3749	968	0.464827	1	0			44326	RF	7479	2587	0.624679	1	0
613	RF	2814	816	0.64402	1	0			44327	RF	7516	2390	0.676825	1	0
614	RF	2825	811	0.570452	1	0			44328	RF	7535	2485	0.561953	1	0
615	RF	2840	803	0.707903	1	0			44329	RF	7536	2512	0.623488	1	0
616	RF	2846	757	0.655275	1	0			44330	RF	7541	2472	0.491393	1	0
617	RF	2859	929	0.598924	1	0			44331	RF	7206	2722	0.72928	1	0
618	RF	2865	792	0.653012	1	0			44332	RF	7244	2686	0.762392	1	0
619	RF	2936	776	0.691755	1	0			44333	RF	7333	2675	0.559408	1	0
620	RF	2950	736	0.712646	1	0			44334	RF	7336	2712	0.682658	1	0
621	RF	2980	780	0.614623	1	0			44335	RF	7361	2460	0.44202	1	0
622	RF	3024	887	0.576591	1	0			44336	RF	7391	2586	0.759472	1	0
623	RF	3039	854	0.607701	1	0			44337	RF	7444	2417	0.174574	1	0
624	RF	3044	867	0.550064	1	0			44338	RF	7454	2589	0.610416	1	0
625	RF	3072	686	0.712729	1	0			44339	RF	7463	2544	0.428024	1	0
626	RF	3076	874	0.572462	1	0			44340	RF	7469	2614	0.39356	1	0
627	RF	3264	899	0.58813	1	0			44341	RF	7511	2550	0.70201	1	0
628	RF	3449	858	0.556367	1	0			44342	RF	7517	2520	0.645036	1	0
629	RF	3479	843	0.845831	1	0			44343	RF	7524	2327	0.338748	1	0
630	RF	3579	790	0.124494	0	1			44344	RF	7534	2211	0.560104	1	0
631	RF	3604	846	0.0241649	0	1			44345	RF	7257	2678	0.432537	1	0
632	RF	3762	787	0.650893	1	0			44346	RF	7294	2490	0.38741	1	0
633	RF	3762	942	0.521743	1	0			44347	RF	7308	2486	0.355619	1	0
634	RF	2817	836	0.838079	1	0			44348	RF	7350	2726	0.721642	1	0
635	RF	2836	738	0.434228	1	0			44349	RF	7351	2499	0.560672	1	0
636	RF	2839	769	0.624447	1	0			44350	RF	7365	2692	0.365529	1	0
637	RF	2844	822	0.683116	1	0			44351	RF	7435	2628	0.564756	1	0
638	RF	2876	769	0.706135	1	0			44352	RF	7455	2608	0.570817	1	0
639	RF	2886	960	0.01	0	1			44353	RF	7485	2494	0.420157	1	0
640	RF	2891	818	0.364459	1	0			44354	RF	7517	2390	0.559255	1	0
641	RF	2919	726	0.267352	1	0			44355	RF	7531	2609	0.611815	1	0
642	RF	2920	734	0.48352	1	0			44356	RF	7282	2658	0.276561	1	0
643	RF	2952	745	0.658731	1	0			44357	RF	7308	2686	0.533512	1	0
644	RF	2955	821	0.615979	1	0			44358	RF	7319	2676	0.345242	1	0
645	RF	2990	899	0.639544	1	0			44359	RF	7326	2497	0.803191	1	0
646	RF	2991	924	0.769248	1	0			44360	RF	7350	2428	0.615623	1	0
647	RF	3006	923	0.255804	1	0			44361	RF	7361	2461	0.374565	1	0
648	RF	3017	684	0.697527	1	0			44362	RF	7390	2586	0.66108	1	0
649	RF	3020	733	0.472332	1	0			44363	RF	7432	2436	0.466499	1	0
650	RF	3050	723	0.682478	1	0			44364	RF	7461	2544	0.450759	1	0
651	RF	3189	850	0.628483	1	0			44365	RF	7539	2316	0.670896	1	0
652	RF	3288	888	0.59587	1	0			44366	RF	7295	2490	0.438584	1	0
653	RF	3308	911	0.630158	1	0			44367	RF	7361	2700	0.519126	1	0
654	RF	3311	889	0.689146	1	0			44368	RF	7416	2448	0.220143	1	0
655	RF	3461	852	0.572561	1	0			44369	RF	7426	2559	0.656666	1	0
656	RF	3547	803	0.495693	1	0			44370	RF	7470	2529	0.475628	1	0
657	RF	3743	943	0.560925	1	0			44371	RF	7502	2506	0.428408	1	0
658	RF	3796	679	0.493579	1	0			44372	RF	7517	2389	0.419204	1	0
659	RF	2817	815	0.558401	1	0			44373	RF	7517	2521	0.581765	1	0
660	RF	2847	761	0.633842	1	0			44374	RF	7532	2553	0.637088	1	0
661	RF	2857	930	0.607401	1	0			44375	RF	7240	2664	0.297882	1	0
662	RF	2863	748	0.382297	1	0			44376	RF	7308	2655	0.537755	1	0
663	RF	2864	792	0.646408	1	0			44377	RF	7343	2453	0.680923	1	0
664	RF	3051	795	0.63305	1	0			44378	RF	7373	2554	0.102582	1	0
665	RF	3076	830	0.41452	1	0			44379	RF	7392	2573	0.687349	1	0
666	RF	3125	684	0.00584305	0	1			44380	RF	7393	2543	0.573313	1	0
667	RF	3177	680	0.560629	1	0			44381	RF	7469	2598	0.615763	1	0
668	RF	3207	853	0.69599	1	0			44382	RF	7529	2204	0.512161	1	0
669	RF	3373	911	0.430399	1	0			44383	RF	7531	2090	0.522098	1	0
670	RF	3403	940	0.355106	1	0			44384	RF	7272	2698	0.587335	1	0
671	RF	3640	880	0.519433	1	0			44385	RF	7285	2698	0.527065	1	0
672	RF	3716	950	0.557659	1	0			44386	RF	7293	2638	0.107465	1	0
673	RF	3753	896	0.34296	0	1			44387	RF	7296	2518	0.533832	1	0
674	RF	3755	765	0.626144	1	0			44388	RF	7307	2708	0.738534	1	0
675	RF	3837	859	0.503895	1	0			44389	RF	7456	2557	0.551181	1	0
676	RF	3859	958	0.397876	1	0			44390	RF	7476	2427	0.471763	1	0
677	RF	3862	738	0.615671	1	0			44391	RF	7497	2478	0.330343	1	0
678	RF	3937	881	0.174778	1	0			44392	RF	7512	2501	0.222728	1	0
679	RF	3938	790	0.603639	1	0			44393	RF	7529	2266	0.443775	1	0
680	RF	3956	764	0.548385	1	0			44394	RF	7538	2404	0.248326	1	0
681	RF	4002	766	0.586317	1	0			44395	RF	7202	2703	0.682801	1	0
682	RF	4010	623	0.653902	1	0			44396	RF	7230	2703	0.395435	1	0
683	RF	4085	823	0.227309	1	0			44397	RF	7278	2734	0.563769	1	0
684	RF	4107	957	0.594914	1	0			44398	RF	7294	2661	0.514033	1	0
685	RF	4115	805	0.696709	1	0			44399	RF	7416	2452	0.276709	1	0
686	RF	4247	745	0.586368	1	0			44400	RF	7470	2599	0.682928	1	0
687	RF	4314	742	0.439503	0	1			44401	RF	7499	2458	0.378243	1	0
688	RF	4385	621	0.518369	1	0			44402	RF	7529	2396	0.148317	1	0
689	RF	4517	614	0.647337	1	0			44403	RF	7564	2296	0.266203	1	0
690	RF	4555	935	0.539082	1	0			44404	RF	7472	2614	0.503108	1	0
691	RF	4570	922	0.58356	1	0			44405	RF	7475	2399	0.377065	1	0
692	RF	4630	942	0.667951	1	0			44406	RF	7534	2484	0.413178	1	0
693	RF	4637	655	0.211581	1	0			44407	RF	7537	2511	0.605927	1	0
694	RF	4698	705	0.487926	1	0			44408	RF	7609	2186	0.313299	1	0
695	RF	4713	901	0.716042	1	0			44409	RF	7620	2492	0.778278	1	0
696	RF	3763	941	0.673647	1	0			44410	RF	7626	2357	0.70179	1	0
697	RF	3791	870	0.224967	1	0			44411	RF	7648	2161	0.564815	1	0
698	RF	3856	715	0.604521	0	1			44412	RF	7657	2038	0.537796	1	0
699	RF	3858	749	0.68698	1	0			44413	RF	7660	2503	0.439976	1	0
700	RF	3887	705	0.542381	1	0			44414	RF	7671	2461	0.403071	1	0
701	RF	3889	919	0.299833	1	0			44415	RF	7686	2414	0.525095	1	0
702	RF	3896	908	0.611941	1	0			44416	RF	7719	2104	0.333138	1	0
703	RF	3947	894	0.58693	1	0			44417	RF	7719	2530	0.6842	1	0
704	RF	3964	768	0.44198	1	0			44418	RF	7721	2542	0.537602	1	0
705	RF	3973	782	0.769912	1	0			44419	RF	7735	1985	0.348035	1	0
706	RF	4056	879	0.582853	1	0			44420	RF	7746	2100	0.425527	1	0
707	RF	4063	912	0.53173	1	0			44421	RF	7747	2615	0.751366	1	0
708	RF	4070	849	0.344454	1	0			44422	RF	7750	2401	0.534136	1	0
709	RF	4071	668	0.483504	1	0			44423	RF	7759	1978	0.312165	1	0
710	RF	4072	756	0.631353	1	0			44424	RF	7770	2610	0.728313	1	0
711	RF	4124	641	0.493899	1	0			44425	RF	7777	2023	0.16413	1	0
712	RF	4202	742	0.403262	1	0			44426	RF	7813	2496	0.649414	1	0
713	RF	4233	846	0.597545	1	0			44427	RF	7820	2293	0.715851	1	0
714	RF	4249	638	0.806208	1	0			44428	RF	7820	2395	0.610838	1	0
715	RF	4254	951	0.50677	1	0			44429	RF	7826	2099	0.162574	1	0
716	RF	4315	795	0.43912	0	1			44430	RF	7839	2047	0.618206	1	0
717	RF	4371	615	0.676082	1	0			44431	RF	7840	1905	0.443432	1	0
718	RF	4373	631	0.675683	1	0			44432	RF	7884	2490	0.661033	1	0
719	RF	4391	634	0.444834	1	0			44433	RF	7897	1888	0.228437	1	0
720	RF	4551	628	0.611833	1	0			44434	RF	7897	2536	0.430876	1	0
721	RF	4604	897	0.505745	1	0			44435	RF	7918	2007	0.611956	1	0
722	RF	4613	899	0.512956	1	0			44436	RF	7923	1831	0.266573	1	0
723	RF	4621	620	0.504831	1	0			44437	RF	7965	1910	0.19591	1	0
724	RF	4625	588	0.504406	1	0			44438	RF	7973	2451	0.626998	1	0
725	RF	4636	712	0.249679	1	0			44439	RF	7974	2424	0.325539	1	0
726	RF	4693	769	0.679825	1	0			44440	RF	7979	2213	0.641192	1	0
727	RF	3780	786	0.5893	1	0			44441	RF	7993	1774	0.475952	1	0
728	RF	3858	943	0.339544	1	0			44442	RF	7994	1847	0.413527	1	0
729	RF	3886	756	0.355589	1	0			44443	RF	7999	1892	0.33931	1	0
730	RF	4010	622	0.615606	1	0			44444	RF	8004	2461	0.36996	1	0
731	RF	4029	808	0.489257	1	0			44445	RF	8003	2528	0.846059	1	0
732	RF	4046	884	0.542283	1	0			44446	RF	8015	2543	0.730685	1	0
733	RF	4133	791	0.579292	1	0			44447	RF	8033	2385	0.632319	1	0
734	RF	4134	648	0.598912	1	0			44448	RF	8037	1990	0.267789	1	0
735	RF	4138	937	0.789948	1	0			44449	RF	8049	2273	0.597768	1	0
736	RF	4180	754	0.490977	1	0			44450	RF	8050	1815	0.611029	1	0
737	RF	4601	911	0.689678	1	0			44451	RF	8061	2282	0.395488	1	0
738	RF	4612	668	0.301137	1	0			44452	RF	8069	1843	0.287724	1	0
739	RF	4624	638	0.67438	1	0			44453	RF	8070	1971	0.673171	1	0
740	RF	4649	899	0.446435	1	0			44454	RF	8078	2555	0.732347	1	0
741	RF	4712	614	0.493383	1	0			44455	RF	8087	2005	0.276433	1	0
742	RF	3745	945	0.681642	1	0			44456	RF	8094	2416	0.442316	1	0
743	RF	3763	941	0.640994	1	0			44457	RF	8095	1888	0.355863	1	0
744	RF	3763	786	0.765209	1	0			44458	RF	8105	2271	0.177191	1	0
745	RF	3791	870	0.157669	1	0			44459	RF	8119	1805	0.216826	1	0
746	RF	3813	865	0.438915	1	0			44460	RF	8124	2032	0.513505	1	0
747	RF	3815	886	0.537298	1	0			44461	RF	8129	2123	0.217708	1	0
748	RF	3835	855	0.352808	1	0			44462	RF	8156	1994	0.410417	1	0
749	RF	3864	737	0.644203	1	0			44463	RF	8191	2246	0.40765	1	0
750	RF	3880	928	0.319727	1	0			44464	RF	8228	2095	0.295217	1	0
751	RF	3893	941	0.423438	1	0			44465	RF	8229	2061	0.129644	1	0
752	RF	3899	780	0.506772	1	0			44466	RF	8231	2048	0.656593	1	0
753	RF	3913	922	0.305512	1	0			44467	RF	8236	2373	0.491677	1	0
754	RF	3925	662	0.568188	1	0			44468	RF	8237	2148	0.430563	1	0
755	RF	3933	920	0.692766	1	0			44469	RF	8239	2011	0.73212	1	0
756	RF	3940	877	0.289829	1	0			44470	RF	8248	1923	0.408784	1	0
757	RF	4002	766	0.505503	1	0			44471	RF	8247	2411	0.515843	1	0
758	RF	4006	832	0.462571	1	0			44472	RF	8252	2044	0.438869	1	0
759	RF	4071	757	0.568291	1	0			44473	RF	8258	1958	0.310134	1	0
760	RF	4085	823	0.237688	1	0			44474	RF	8261	1786	0.444968	1	0
761	RF	4106	957	0.564282	1	0			44475	RF	8273	2294	0.512215	1	0
762	RF	4115	787	0.496309	0	1			44476	RF	8277	2449	0.466058	1	0
763	RF	4154	957	0.522391	1	0			44477	RF	8281	1827	0.0492339	1	0
764	RF	4170	639	0.597614	1	0			44478	RF	8289	1864	0.133927	1	0
765	RF	4238	947	0.622136	1	0			44479	RF	8302	2346	0.801555	1	0
766	RF	4250	724	0.212804	1	0			44480	RF	8310	2015	0.398927	1	0
767	RF	4254	949	0.573235	1	0			44481	RF	8318	2413	0.540418	1	0
768	RF	4315	833	0.514964	1	0			44482	RF	8328	2441	0.531293	1	0
769	RF	4336	686	0.382571	1	0			44483	RF	8339	1782	0.144024	1	0
770	RF	4341	848	0.742583	1	0			44484	RF	8339	2200	0.39458	1	0
771	RF	4387	614	0.68504	1	0			44485	RF	8353	2157	0.548526	1	0
772	RF	4623	621	0.391516	1	0			44486	RF	8359	2347	0.509845	1	0
773	RF	4626	955	0.604054	1	0			44487	RF	8365	2389	0.481236	1	0
774	RF	4688	952	0.618475	1	0			44488	RF	8385	2309	0.324008	1	0
775	RF	4692	665	0.019829	1	0			44489	RF	8385	2386	0.609475	1	0
776	RF	4693	769	0.678636	1	0			44490	RF	8394	1785	0.107694	1	0
777	RF	3809	774	0.717254	1	0			44491	RF	8424	1832	0.209566	1	0
778	RF	3914	664	0.630552	1	0			44492	RF	8434	1818	0.46137	1	0
779	RF	3951	871	0.206342	1	0			44493	RF	8453	2005	0.428775	1	0
780	RF	4040	776	0.412487	1	0			44494	RF	7480	2586	0.598845	1	0
781	RF	4054	816	0.631322	1	0			44495	RF	7512	2549	0.658333	1	0
782	RF	4063	911	0.678594	1	0			44496	RF	7517	2389	0.569339	1	0
783	RF	4173	762	0.548482	1	0			44497	RF	7539	2315	0.661094	1	0
784	RF	4217	656	0.638905	1	0			44498	RF	7623	2409	0.325621	1	0
785	RF	4234	849	0.541192	1	0			44499	RF	7629	2453	0.665784	1	0
786	RF	4278	699	0.830795	1	0			44500	RF	7687	2604	0.602321	1	0
787	RF	4333	928	0.567109	1	0			44501	RF	7694	2488	0.511334	1	0
788	RF	4373	631	0.718305	1	0			44502	RF	7699	2436	0.438321	1	0
789	RF	4478	612	0.520413	1	0			44503	RF	7699	2633	0.487961	1	0
790	RF	4554	935	0.462047	1	0			44504	RF	7704	2450	0.488166	1	0
791	RF	4611	909	0.620483	1	0			44505	RF	7725	2369	0.469132	1	0
792	RF	4624	638	0.606001	1	0			44506	RF	7728	2058	0.300557	1	0
793	RF	4636	713	0.463679	1	0			44507	RF	7748	2012	0.128245	1	0
794	RF	4645	881	0.704035	1	0			44508	RF	7755	2446	0.421548	1	0
795	RF	4649	900	0.340691	1	0			44509	RF	7773	2512	0.699275	1	0
796	RF	4665	674	0.74703	1	0			44510	RF	7774	2631	0.83875	1	0
797	RF	3742	942	0.511547	1	0			44511	RF	7797	2255	0.624092	1	0
798	RF	3762	787	0.693297	1	0			44512	RF	7797	2365	0.427799	1	0
799	RF	3912	721	0.712647	1	0			44513	RF	7800	1962	0.252349	1	0
800	RF	3926	662	0.530375	1	0			44514	RF	7816	2053	0.274121	1	0
801	RF	4053	747	0.567935	1	0			44515	RF	7830	2017	0.420525	1	0
802	RF	4085	742	0.002084	0	1			44516	RF	7844	1957	0.27535	1	0
803	RF	4094	717	0.592005	1	0			44517	RF	7852	2076	0.224219	1	0
804	RF	4152	635	0.644319	1	0			44518	RF	7865	2340	0.453815	1	0
805	RF	4255	744	0.302922	0	1			44519	RF	7905	1785	0.380298	1	0
806	RF	4263	711	0.431119	1	0			44520	RF	7929	2075	0.220682	1	0
807	RF	4311	689	0.666577	1	0			44521	RF	7946	2474	0.558404	1	0
808	RF	4611	895	0.648226	1	0			44522	RF	7949	2186	0.407095	1	0
809	RF	4636	948	0.634857	1	0			44523	RF	7951	2518	0.860249	1	0
810	RF	4672	914	0.731525	1	0			44524	RF	7952	2567	0.720514	1	0
811	RF	4679	952	0.461927	1	0			44525	RF	7956	2289	0.713828	1	0
812	RF	4709	614	0.399565	1	0			44526	RF	7963	1811	0.406796	1	0
813	RF	3795	676	0.623301	1	0			44527	RF	7970	2176	0.69989	1	0
814	RF	3815	885	0.27783	1	0			44528	RF	8017	1812	0.470193	1	0
815	RF	3844	708	0.467596	1	0			44529	RF	8054	2316	0.491125	1	0
816	RF	3856	745	0.458421	1	0			44530	RF	8068	1993	0.499517	1	0
817	RF	3962	905	0.756899	1	0			44531	RF	8069	1894	0.120361	1	0
818	RF	3971	859	0.626086	1	0			44532	RF	8069	2382	0.597138	1	0
819	RF	4008	736	0.01	0	1			44533	RF	8076	1907	0.453538	1	0
820	RF	4039	776	0.370369	1	0			44534	RF	8077	1788	0.638808	1	0
821	RF	4055	816	0.661343	1	0			44535	RF	8080	2162	0.708707	1	0
822	RF	4127	912	0.737174	1	0			44536	RF	8102	1823	0.185942	1	0
823	RF	4140	797	0.570124	1	0			44537	RF	8114	2534	0.75227	1	0
824	RF	4145	945	0.795135	1	0			44538	RF	8127	1889	0.164992	1	0
825	RF	4172	640	0.613082	1	0			44539	RF	8131	1811	0.159975	1	0
826	RF	4179	716	0.59482	1	0			44540	RF	8146	1802	0.302991	1	0
827	RF	4236	638	0.66908	1	0			44541	RF	8180	1941	0.277173	1	0
828	RF	4333	928	0.523973	1	0			44542	RF	8190	1978	0.478241	1	0
829	RF	4377	656	0.778233	1	0			44543	RF	8194	2425	0.718222	1	0
830	RF	4578	933	0.6043	1	0			44544	RF	8218	2090	0.168102	1	0
831	RF	4626	951	0.530319	1	0			44545	RF	8225	2410	0.695427	1	0
832	RF	4668	673	0.689583	1	0			44546	RF	8241	2287	0.460937	1	0
833	RF	4696	606	0.480756	1	0			44547	RF	8245	2344	0.455635	1	0
834	RF	4704	620	0.533176	1	0			44548	RF	8261	2328	0.364985	1	0
835	RF	3742	942	0.475156	1	0			44549	RF	8273	2382	0.563881	1	0
836	RF	3831	929	0.468475	1	0			44550	RF	8277	1997	0.158933	1	0
837	RF	3944	931	0.786156	1	0			44551	RF	8287	2364	0.65616	1	0
838	RF	4059	939	0.612795	1	0			44552	RF	8319	2097	0.103786	1	0
839	RF	4085	743	0.00349763	0	1			44553	RF	8332	1800	0.367766	1	0
840	RF	4094	717	0.5953	1	0			44554	RF	8341	2175	0.228823	1	0
841	RF	4311	690	0.672461	1	0			44555	RF	8346	2464	0.475842	1	0
842	RF	4316	670	0.146609	1	0			44556	RF	8359	2469	0.528484	1	0
843	RF	4575	827	0.648169	1	0			44557	RF	8370	2473	0.695737	1	0
844	RF	4634	885	0.518478	1	0			44558	RF	8373	1794	0.521952	1	0
845	RF	4654	674	0.51825	1	0			44559	RF	8384	2336	0.739089	1	0
846	RF	4655	685	0.505993	1	0			44560	RF	8434	2268	0.711576	1	0
847	RF	4679	952	0.47336	1	0			44561	RF	8440	2383	0.726609	1	0
848	RF	4710	923	0.532939	1	0			44562	RF	8447	2301	0.662699	1	0
849	RF	4711	899	0.661238	1	0			44563	RF	8465	1962	0.393418	1	0
850	RF	4771	898	0.450534	0	1			44564	RF	7475	2399	0.356719	1	0
851	RF	4777	798	0.515582	1	0			44565	RF	7486	2493	0.366259	1	0
852	RF	4808	844	0.370402	1	0			44566	RF	7520	2501	0.39375	1	0
853	RF	4810	869	0.741959	1	0			44567	RF	7531	2607	0.536834	1	0
854	RF	4824	810	0.632767	1	0			44568	RF	7534	2210	0.548753	1	0
855	RF	4828	883	0.747821	1	0			44569	RF	7540	2473	0.253082	1	0
856	RF	4835	796	0.757964	1	0			44570	RF	7541	2247	0.166422	1	0
857	RF	4881	836	0.48136	1	0			44571	RF	7562	2449	0.108816	1	0
858	RF	4887	586	0.594726	1	0			44572	RF	7571	2497	0.646948	1	0
859	RF	4904	682	0.393024	1	0			44573	RF	7596	2419	0.227161	1	0
860	RF	4919	601	0.429483	1	0			44574	RF	7599	2651	0.537165	1	0
861	RF	5000	764	0.695878	1	0			44575	RF	7626	2357	0.640202	1	0
862	RF	5019	857	0.804207	1	0			44576	RF	7731	2448	0.412452	1	0
863	RF	5103	581	0.630791	1	0			44577	RF	7756	2327	0.50872	1	0
864	RF	5143	891	0.579367	1	0			44578	RF	7759	1977	0.352748	1	0
865	RF	5181	608	0.720227	1	0			44579	RF	7768	2311	0.0886917	1	0
866	RF	5195	654	0.192379	1	0			44580	RF	7776	2022	0.062538	1	0
867	RF	5268	903	0.206478	1	0			44581	RF	7787	2305	0.351043	1	0
868	RF	5290	695	0.663847	1	0			44582	RF	7809	2114	0.527449	1	0
869	RF	5357	750	0.492468	1	0			44583	RF	7818	2082	0.533298	1	0
870	RF	5462	818	0.670932	1	0			44584	RF	7819	2295	0.640407	1	0
871	RF	5467	825	0.662519	1	0			44585	RF	7826	2364	0.396216	1	0
872	RF	5478	874	0.541259	1	0			44586	RF	7837	2222	0.661715	1	0
873	RF	5570	696	0.4367	1	0			44587	RF	7839	1905	0.386321	1	0
874	RF	5655	810	0.435054	1	0			44588	RF	7850	2529	0.787628	1	0
875	RF	4694	767	0.667723	1	0			44589	RF	7852	2086	0.30104	1	0
876	RF	4751	697	0.692165	1	0			44590	RF	7873	2106	0.386001	1	0
877	RF	4775	732	0.54245	1	0			44591	RF	7894	1924	0.478636	1	0
878	RF	4793	848	0.678767	1	0			44592	RF	7903	2511	0.344637	1	0
879	RF	4798	810	0.527797	1	0			44593	RF	7932	2535	0.550438	1	0
880	RF	4837	831	0.571617	1	0			44594	RF	7952	2212	0.632668	1	0
881	RF	4852	632	0.617243	1	0			44595	RF	7960	2206	0.41625	1	0
882	RF	4872	842	0.315908	1	0			44596	RF	7978	1899	0.208939	1	0
883	RF	4903	671	0.244958	1	0			44597	RF	7989	2508	0.362191	1	0
884	RF	4921	828	0.437179	1	0			44598	RF	7999	2469	0.622716	1	0
885	RF	4960	757	0.511387	1	0			44599	RF	8053	1810	0.453324	1	0
886	RF	5076	740	0.470002	1	0			44600	RF	8055	1976	0.39897	1	0
887	RF	5114	587	0.678157	1	0			44601	RF	8058	2560	0.689047	1	0
888	RF	5121	833	0.713359	1	0			44602	RF	8127	2000	0.427949	1	0
889	RF	5151	773	0.596411	1	0			44603	RF	8131	2431	0.429567	1	0
890	RF	5152	794	0.73234	1	0			44604	RF	8152	2307	0.706298	1	0
891	RF	5165	787	0.701708	0	1			44605	RF	8183	1961	0.397364	1	0
892	RF	5235	588	0.62083	1	0			44606	RF	8188	2151	0.499674	1	0
893	RF	5240	558	0.843428	1	0			44607	RF	8197	2389	0.712006	1	0
894	RF	5297	685	0.477981	1	0			44608	RF	8211	2505	0.895204	1	0
895	RF	5335	664	0.606789	1	0			44609	RF	8216	1948	0.399447	1	0
896	RF	5395	761	0.596207	1	0			44610	RF	8221	1765	0.465143	1	0
897	RF	5404	746	0.68185	1	0			44611	RF	8236	2148	0.517967	1	0
898	RF	5407	904	0.637147	1	0			44612	RF	8240	2011	0.710664	1	0
899	RF	5427	640	0.668173	1	0			44613	RF	8246	1922	0.27303	1	0
900	RF	5437	650	0.483148	1	0			44614	RF	8248	2278	0.34073	1	0
901	RF	5439	638	0.496253	1	0			44615	RF	8256	2111	0.504083	1	0
902	RF	5471	588	0.66787	1	0			44616	RF	8260	2128	0.452584	1	0
903	RF	5557	676	0.578349	1	0			44617	RF	8271	1922	0.320956	1	0
904	RF	5578	729	0.449466	1	0			44618	RF	8270	2258	0.175802	1	0
905	RF	5628	733	0.660889	1	0			44619	RF	8276	2213	0.239388	1	0
906	RF	5644	769	0.42579	1	0			44620	RF	8278	2405	0.254916	1	0
907	RF	5656	591	0.321738	1	0			44621	RF	8301	2107	0.261251	1	0
908	RF	5662	726	0.644023	1	0			44622	RF	8302	2345	0.817778	1	0
909	RF	4664	674	0.67664	1	0			44623	RF	8303	1953	0.153565	1	0
910	RF	4736	584	0.562904	1	0			44624	RF	8303	2371	0.588175	1	0
911	RF	4824	810	0.575666	1	0			44625	RF	8308	1782	0.404317	1	0
912	RF	4828	882	0.722087	1	0			44626	RF	8317	2390	0.577241	1	0
913	RF	4834	795	0.702002	1	0			44627	RF	8323	2234	0.55857	1	0
914	RF	4840	805	0.723105	1	0			44628	RF	8326	2441	0.395647	1	0
915	RF	4851	837	0.623952	1	0			44629	RF	8337	2376	0.443533	1	0
916	RF	4851	857	0.481715	1	0			44630	RF	8338	1783	0.199867	1	0
917	RF	4855	701	0.629963	1	0			44631	RF	8341	2363	0.545669	1	0
918	RF	4856	581	0.687419	1	0			44632	RF	8380	1873	0.218894	1	0
919	RF	4875	580	0.578133	1	0			44633	RF	8406	2292	0.644903	1	0
920	RF	4905	656	0.564647	1	0			44634	RF	8429	2274	0.584467	1	0
921	RF	4906	683	0.293541	1	0			44635	RF	8438	2208	0.507175	1	0
922	RF	4914	682	0.424843	1	0			44636	RF	8451	1975	0.530485	1	0
923	RF	4932	911	0.653031	1	0			44637	RF	8453	2004	0.374645	1	0
924	RF	4942	590	0.384444	1	0			44638	RF	8463	2399	0.579183	1	0
925	RF	4959	734	0.470523	1	0			44639	RF	7518	2519	0.635496	1	0
926	RF	5099	687	0.434347	1	0			44640	RF	7525	2326	0.306003	1	0
927	RF	5146	783	0.642121	0	1			44641	RF	7531	2090	0.441676	1	0
928	RF	5343	674	0.742549	1	0			44642	RF	7539	2316	0.643165	1	0
929	RF	5348	663	0.582654	1	0			44643	RF	7583	2524	0.136175	1	0
930	RF	5398	582	0.326164	1	0			44644	RF	7632	2169	0.461679	1	0
931	RF	5414	754	0.628922	1	0			44645	RF	7635	2475	0.37532	1	0
932	RF	5497	706	0.633759	1	0			44646	RF	7696	2653	0.570461	1	0
933	RF	5548	736	0.594751	1	0			44647	RF	7707	2569	0.643732	1	0
934	RF	5566	729	0.616507	1	0			44648	RF	7740	2641	0.0819635	1	0
935	RF	5570	696	0.365838	1	0			44649	RF	7761	2563	0.246867	1	0
936	RF	5649	539	0.394445	0	1			44650	RF	7774	2625	0.794882	1	0
937	RF	4711	899	0.482416	1	0			44651	RF	7797	2365	0.32519	1	0
938	RF	4712	613	0.486177	1	0			44652	RF	7829	2069	0.206575	1	0
939	RF	4749	700	0.647995	1	0			44653	RF	7842	2289	0.513615	1	0
940	RF	4761	906	0.808362	1	0			44654	RF	7873	2521	0.508702	1	0
941	RF	4821	784	0.648467	1	0			44655	RF	7880	2081	0.198761	1	0
942	RF	4842	602	0.717973	1	0			44656	RF	7882	2100	0.606202	1	0
943	RF	4859	772	0.611764	1	0			44657	RF	7907	1968	0.47819	1	0
944	RF	4881	817	0.447868	1	0			44658	RF	7908	2310	0.146047	1	0
945	RF	4971	697	0.506847	1	0			44659	RF	7926	2017	0.425672	1	0
946	RF	5024	842	0.797509	1	0			44660	RF	7928	2327	0.568899	1	0
947	RF	5055	911	0.327586	1	0			44661	RF	7929	2556	0.425538	1	0
948	RF	5080	746	0.421179	1	0			44662	RF	7930	2074	0.143583	1	0
949	RF	5152	793	0.736585	1	0			44663	RF	7932	2348	0.500453	1	0
950	RF	5293	685	0.525354	1	0			44664	RF	7933	1942	0.40848	1	0
951	RF	5309	943	0.585153	1	0			44665	RF	7942	2295	0.337567	1	0
952	RF	5335	664	0.658116	1	0			44666	RF	7960	2533	0.383798	1	0
953	RF	5407	904	0.664932	1	0			44667	RF	7982	2473	0.349603	1	0
954	RF	5428	640	0.594017	1	0			44668	RF	7987	2300	0.651679	1	0
955	RF	5438	638	0.450021	1	0			44669	RF	7996	1895	0.33929	1	0
956	RF	5462	885	0.534248	1	0			44670	RF	8011	2561	0.509391	1	0
957	RF	5468	823	0.523425	1	0			44671	RF	8018	1968	0.408637	1	0
958	RF	5477	874	0.427785	1	0			44672	RF	8027	1881	0.256586	1	0
959	RF	5549	706	0.192513	1	0			44673	RF	8046	2564	0.557992	1	0
960	RF	5642	771	0.519208	1	0			44674	RF	8054	2316	0.433303	1	0
961	RF	4694	665	0.0227493	1	0			44675	RF	8076	1908	0.47896	1	0
962	RF	4736	584	0.486699	1	0			44676	RF	8076	1788	0.512111	1	0
963	RF	4793	848	0.565573	1	0			44677	RF	8081	2161	0.635864	1	0
964	RF	4833	737	0.635192	1	0			44678	RF	8102	1851	0.0813821	1	0
965	RF	4839	807	0.759262	1	0			44679	RF	8128	2448	0.457476	1	0
966	RF	4850	837	0.601361	1	0			44680	RF	8141	1771	0.115559	1	0
967	RF	4880	618	0.527183	1	0			44681	RF	8155	1967	0.449545	1	0
968	RF	4880	881	0.578022	1	0			44682	RF	8158	1817	0.313846	1	0
969	RF	4894	812	0.555438	1	0			44683	RF	8192	1977	0.468475	1	0
970	RF	4915	681	0.354815	1	0			44684	RF	8203	2396	0.84713	1	0
971	RF	4941	874	0.418527	1	0			44685	RF	8214	2009	0.208782	1	0
972	RF	4941	664	0.682682	1	0			44686	RF	8228	2335	0.400138	1	0
973	RF	5032	708	0.415536	1	0			44687	RF	8248	2488	0.127979	1	0
974	RF	5079	729	0.50276	1	0			44688	RF	8260	2318	0.66839	1	0
975	RF	5103	690	0.301952	1	0			44689	RF	8260	2329	0.378136	1	0
976	RF	5155	922	0.655333	1	0			44690	RF	8266	2152	0.685672	1	0
977	RF	5235	913	0.760186	1	0			44691	RF	8272	2382	0.484896	1	0
978	RF	5240	579	0.564653	1	0			44692	RF	8276	1998	0.191757	1	0
979	RF	5270	749	0.627249	1	0			44693	RF	8300	1979	0.0871094	1	0
980	RF	5279	560	0.637727	1	0			44694	RF	8316	1805	0.336632	1	0
981	RF	5293	572	0.679002	1	0			44695	RF	8319	2098	0.0618867	1	0
982	RF	5327	640	0.484073	1	0			44696	RF	8353	2386	0.424167	1	0
983	RF	5348	663	0.607377	1	0			44697	RF	8359	2324	0.576151	1	0
984	RF	5396	609	0.595306	1	0			44698	RF	8361	2339	0.60112	1	0
985	RF	4669	673	0.659057	1	0			44699	RF	8365	2076	0.843608	1	0
986	RF	4696	605	0.416603	1	0			44700	RF	8383	2408	0.463602	1	0
987	RF	4709	921	0.558509	1	0			44701	RF	8387	1810	0.360996	1	0
988	RF	4849	878	0.784755	1	0			44702	RF	8396	2003	0.435311	1	0
989	RF	4872	910	0.635813	1	0			44703	RF	8413	1901	0.175995	1	0
990	RF	4875	926	0.851802	1	0			44704	RF	8426	2026	0.395588	1	0
991	RF	4887	857	0.609126	1	0			44705	RF	8427	2417	0.421305	1	0
992	RF	4911	808	0.516806	1	0			44706	RF	8433	1960	0.480304	1	0
993	RF	4937	863	0.632906	1	0			44707	RF	8438	2384	0.686634	1	0
994	RF	4941	840	0.484349	1	0			44708	RF	8452	2160	0.608096	1	0
995	RF	4982	691	0.688441	1	0			44709	RF	7487	2493	0.211239	1	0
996	RF	5022	842	0.820013	1	0			44710	RF	7532	2551	0.463074	1	0
997	RF	5104	580	0.675547	1	0			44711	RF	7563	2448	0.108621	1	0
998	RF	5105	727	0.587185	1	0			44712	RF	7586	2449	0.604457	1	0
999	RF	5113	668	0.608542	1	0			44713	RF	7591	2581	0.577341	1	0
1000	RF	5173	893	0.715633	1	0			44714	RF	7602	2476	0.569724	1	0
1001	RF	5177	563	0.728865	1	0			44715	RF	7627	2122	0.621413	1	0
1002	RF	5186	816	0.324693	0	1			44716	RF	7663	2468	0.436026	1	0
1003	RF	5239	559	0.804287	1	0			44717	RF	7682	2629	0.559144	1	0
1004	RF	5245	764	0.72026	1	0			44718	RF	7692	2144	0.375554	1	0
1005	RF	5250	590	0.528968	1	0			44719	RF	7695	2022	0.414355	1	0
1006	RF	5311	943	0.472003	1	0			44720	RF	7751	2038	0.565711	1	0
1007	RF	5322	633	0.597861	1	0			44721	RF	7754	2447	0.510732	1	0
1008	RF	5325	711	0.478929	1	0			44722	RF	7767	2391	0.519394	1	0
1009	RF	5366	759	0.58171	1	0			44723	RF	7770	2008	0.492388	1	0
1010	RF	5380	781	0.675423	1	0			44724	RF	7784	2331	0.498748	1	0
1011	RF	5615	700	0.680218	1	0			44725	RF	7787	2306	0.353154	1	0
1012	RF	5623	730	0.681931	1	0			44726	RF	7800	2423	0.694951	1	0
1013	RF	5638	721	0.639003	1	0			44727	RF	7824	1937	0.161229	1	0
1014	RF	5638	773	0.473078	1	0			44728	RF	7826	1967	0.282507	1	0
1015	RF	5654	745	0.78005	1	0			44729	RF	7836	2222	0.608681	1	0
1016	RF	4672	913	0.65943	1	0			44730	RF	7840	2313	0.305939	1	0
1017	RF	4749	702	0.62353	1	0			44731	RF	7873	2107	0.377894	1	0
1018	RF	4817	780	0.610512	1	0			44732	RF	7882	2029	0.15077	1	0
1019	RF	4869	846	0.637659	1	0			44733	RF	7905	1900	0.215016	1	0
1020	RF	4873	868	0.427055	1	0			44734	RF	7905	2073	0.403826	1	0
1021	RF	4895	813	0.653261	1	0			44735	RF	7912	1819	0.417496	1	0
1022	RF	4942	664	0.711264	1	0			44736	RF	7913	1943	0.467289	1	0
1023	RF	4959	833	0.740711	1	0			44737	RF	7914	2092	0.528781	1	0
1024	RF	5004	588	0.673629	1	0			44738	RF	7918	2549	0.429702	1	0
1025	RF	5102	691	0.301248	1	0			44739	RF	7938	2003	0.40309	1	0
1026	RF	5139	765	0.481442	1	0			44740	RF	7943	2491	0.633614	1	0
1027	RF	5154	686	0.549159	1	0			44741	RF	7949	2513	0.754384	1	0
1028	RF	5162	659	0.634663	1	0			44742	RF	7951	2211	0.593331	1	0
1029	RF	5206	559	0.573399	1	0			44743	RF	7964	2491	0.502286	1	0
1030	RF	5279	561	0.592823	1	0			44744	RF	7966	2186	0.351131	1	0
1031	RF	5279	784	0.678128	1	0			44745	RF	7977	2437	0.565718	1	0
1032	RF	5298	708	0.645588	1	0			44746	RF	7989	2507	0.246464	1	0
1033	RF	5305	639	0.519954	1	0			44747	RF	7990	2198	0.818158	1	0
1034	RF	5425	571	0.705717	1	0			44748	RF	7991	2455	0.495724	1	0
1035	RF	5473	775	0.567874	1	0			44749	RF	7991	2560	0.429139	0	1
1036	RF	5586	730	0.563889	1	0			44750	RF	7999	2326	0.773374	1	0
1037	RF	5595	739	0.605668	1	0			44751	RF	8004	1928	0.421461	1	0
1038	RF	5653	549	0.319141	1	0			44752	RF	8058	2560	0.666666	1	0
1039	RF	5654	603	0.479342	1	0			44753	RF	8058	2298	0.547891	1	0
1040	RF	5662	727	0.662	1	0			44754	RF	8072	2145	0.660223	1	0
1041	RF	5663	840	0.575655	1	0			44755	RF	8098	2325	0.60863	1	0
1042	RF	4695	605	0.403323	1	0			44756	RF	8101	1823	0.207496	1	0
1043	RF	4832	827	0.642515	1	0			44757	RF	8106	2432	0.728139	1	0
1044	RF	4843	601	0.543532	1	0			44758	RF	8108	2044	0.295236	1	0
1045	RF	4844	872	0.832628	1	0			44759	RF	8131	2431	0.391328	1	0
1046	RF	4863	608	0.658852	1	0			44760	RF	8141	2512	0.480004	1	0
1047	RF	4872	911	0.636143	1	0			44761	RF	8146	1963	0.443569	1	0
1048	RF	4875	926	0.844432	1	0			44762	RF	8169	2507	0.544746	1	0
1049	RF	4889	845	0.48984	1	0			44763	RF	8179	1806	0.162702	1	0
1050	RF	4896	851	0.484932	1	0			44764	RF	8181	2075	0.149688	1	0
1051	RF	4920	708	0.724235	1	0			44765	RF	8181	2226	0.230632	1	0
1052	RF	4936	863	0.717279	1	0			44766	RF	8187	1958	0.509625	1	0
1053	RF	4964	777	0.594662	1	0			44767	RF	8198	2209	0.345773	1	0
1054	RF	4982	691	0.718362	1	0			44768	RF	8220	2469	0.665585	1	0
1055	RF	5034	749	0.575965	1	0			44769	RF	8225	2109	0.651686	1	0
1056	RF	5140	800	0.677678	1	0			44770	RF	8234	1971	0.282559	1	0
1057	RF	5167	796	0.67757	1	0			44771	RF	8239	2422	0.514621	1	0
1058	RF	5176	767	0.634064	1	0			44772	RF	8241	2412	0.443482	1	0
1059	RF	5203	651	0.428537	1	0			44773	RF	8245	2342	0.622468	1	0
1060	RF	5267	732	0.598626	1	0			44774	RF	8253	2396	0.625941	1	0
1061	RF	5325	711	0.492346	1	0			44775	RF	8267	2292	0.584932	1	0
1062	RF	5409	750	0.494665	1	0			44776	RF	8268	2083	0.798067	1	0
1063	RF	5495	799	0.590396	1	0			44777	RF	8281	1770	0.290872	1	0
1064	RF	5614	698	0.741484	1	0			44778	RF	8287	1949	0.444454	1	0
1065	RF	5624	729	0.605084	1	0			44779	RF	8289	1905	0.341266	1	0
1066	RF	5624	688	0.880615	1	0			44780	RF	8301	2108	0.17371	1	0
1067	RF	5656	568	0.39638	0	1			44781	RF	8302	2120	0.603527	1	0
1068	RF	5657	590	0.378544	1	0			44782	RF	8322	2234	0.483095	1	0
1069	RF	5657	811	0.530504	1	0			44783	RF	8325	2471	0.164417	1	0
1070	RF	5662	726	0.551935	1	0			44784	RF	8340	2176	0.154813	1	0
1071	RF	5696	870	0.555167	1	0			44785	RF	8373	2422	0.434619	1	0
1072	RF	5727	873	0.202964	1	0			44786	RF	8376	2304	0.548209	1	0
1073	RF	5755	638	0.495855	1	0			44787	RF	8380	2214	0.381868	1	0
1074	RF	5777	851	0.687467	1	0			44788	RF	8389	2292	0.550592	1	0
1075	RF	5789	666	0.587068	1	0			44789	RF	8400	2028	0.0852789	1	0
1076	RF	5792	795	0.714423	1	0			44790	RF	8420	2182	0.477926	1	0
1077	RF	5836	543	0.609246	1	0			44791	RF	8441	2303	0.574756	1	0
1078	RF	5630	734	0.572608	1	0			44792	RF	8446	1799	0.333602	1	0
1079	RF	5641	541	0.157325	0	1			44793	RF	7479	2426	0.379718	1	0
1080	RF	5644	768	0.469486	1	0			44794	RF	7518	2389	0.40694	1	0
1081	RF	5671	836	0.784776	1	0			44795	RF	7530	2090	0.511858	1	0
1082	RF	5757	864	0.707181	1	0			44796	RF	7559	2679	0.377804	1	0
1083	RF	5779	778	0.725288	1	0			44797	RF	7576	2595	0.630771	1	0
1084	RF	5812	629	0.758048	1	0			44798	RF	7633	2393	0.356805	1	0
1085	RF	5819	560	0.421267	1	0			44799	RF	7663	2034	0.596034	1	0
1086	RF	5824	739	0.636643	1	0			44800	RF	7674	2165	0.483661	1	0
1087	RF	5835	529	0.641119	1	0			44801	RF	7674	2452	0.643828	1	0
1088	RF	5841	678	0.227338	1	0			44802	RF	7677	2611	0.470016	1	0
1089	RF	5897	605	0.739954	1	0			44803	RF	7702	2455	0.584439	1	0
1090	RF	5662	725	0.687244	1	0			44804	RF	7727	2418	0.718805	1	0
1091	RF	5739	880	0.524865	1	0			44805	RF	7732	2031	0.568904	1	0
1092	RF	5777	909	0.507774	1	0			44806	RF	7747	2012	0.155991	1	0
1093	RF	5787	814	0.517909	1	0			44807	RF	7751	2528	0.702895	1	0
1094	RF	5788	854	0.734076	1	0			44808	RF	7751	2623	0.742642	1	0
1095	RF	5791	794	0.724939	1	0			44809	RF	7769	2311	0.061919	1	0
1096	RF	5828	747	0.550903	1	0			44810	RF	7776	2598	0.0367251	1	0
1097	RF	5861	527	0.540009	1	0			44811	RF	7777	2046	0.0778863	1	0
1098	RF	5877	559	0.645395	1	0			44812	RF	7779	2556	0.516845	1	0
1099	RF	5882	587	0.38419	1	0			44813	RF	7799	2333	0.296068	1	0
1100	RF	5914	547	0.82804	1	0			44814	RF	7801	2561	0.561722	1	0
1101	RF	5643	770	0.573713	1	0			44815	RF	7849	2366	0.463035	1	0
1102	RF	5654	809	0.540975	1	0			44816	RF	7852	2513	0.48846	1	0
1103	RF	5665	840	0.768586	1	0			44817	RF	7861	2037	0.200269	1	0
1104	RF	5691	931	0.575642	1	0			44818	RF	7893	2541	0.350518	1	0
1105	RF	5758	863	0.721216	1	0			44819	RF	7907	2472	0.491595	1	0
1106	RF	5794	665	0.603285	1	0			44820	RF	7927	2325	0.628994	1	0
1107	RF	5812	674	0.529515	1	0			44821	RF	7935	2533	0.693677	1	0
1108	RF	5824	739	0.60084	1	0			44822	RF	7942	2063	0.523711	1	0
1109	RF	5851	567	0.607753	1	0			44823	RF	7956	2322	0.415377	1	0
1110	RF	5907	563	0.735013	1	0			44824	RF	7968	2560	0.582222	1	0
1111	RF	5921	520	0.464553	0	1			44825	RF	7970	2083	0.255089	1	0
1112	RF	5938	535	0.469048	1	0			44826	RF	7988	1983	0.528008	1	0
1113	RF	5655	744	0.77959	1	0			44827	RF	7999	2468	0.61263	1	0
1114	RF	5662	726	0.696717	1	0			44828	RF	8002	2286	0.28707	1	0
1115	RF	5671	618	0.318362	1	0			44829	RF	8005	1893	0.436264	1	0
1116	RF	5689	871	0.659043	1	0			44830	RF	8035	1989	0.469365	1	0
1117	RF	5737	881	0.551271	1	0			44831	RF	8049	2136	0.158893	1	0
1118	RF	5741	923	0.653711	1	0			44832	RF	8072	2288	0.363546	1	0
1119	RF	5750	570	0.672466	1	0			44833	RF	8078	2151	0.532541	1	0
1120	RF	5774	775	0.724542	1	0			44834	RF	8108	1850	0.0700302	1	0
1121	RF	5776	834	0.612364	1	0			44835	RF	8111	1782	0.0263316	1	0
1122	RF	5777	910	0.48113	1	0			44836	RF	8122	2064	0.22304	1	0
1123	RF	5788	772	0.594344	1	0			44837	RF	8157	2230	0.537365	1	0
1124	RF	5832	754	0.48135	1	0			44838	RF	8170	1808	0.189101	1	0
1125	RF	5833	533	0.596278	1	0			44839	RF	8184	2174	0.567365	1	0
1126	RF	5839	660	0.693318	1	0			44840	RF	8205	2241	0.363511	1	0
1127	RF	5858	539	0.513462	1	0			44841	RF	8207	2267	0.302183	1	0
1128	RF	5860	528	0.472188	1	0			44842	RF	8213	1797	0.366451	1	0
1129	RF	5914	547	0.811951	1	0			44843	RF	8226	2373	0.205814	1	0
1130	RF	5597	738	0.589567	1	0			44844	RF	8232	2006	0.390562	1	0
1131	RF	5625	729	0.615342	1	0			44845	RF	8237	1940	0.386292	1	0
1132	RF	5639	721	0.686524	1	0			44846	RF	8260	2318	0.629245	1	0
1133	RF	5664	863	0.750008	1	0			44847	RF	8274	2138	0.279166	1	0
1134	RF	5683	605	0.247673	1	0			44848	RF	8280	2366	0.457191	1	0
1135	RF	5764	776	0.716417	1	0			44849	RF	8284	2474	0.586106	1	0
1136	RF	5767	932	0.679542	1	0			44850	RF	8310	2323	0.393117	1	0
1137	RF	5824	772	0.445442	1	0			44851	RF	8320	2056	0.606917	1	0
1138	RF	5938	534	0.402292	1	0			44852	RF	8329	1968	0.0843651	1	0
1139	RF	5978	565	0.730395	1	0			44853	RF	8351	2454	0.554816	1	0
1140	RF	5617	698	0.713839	1	0			44854	RF	8353	1771	0.266295	1	0
1141	RF	5665	827	0.612472	1	0			44855	RF	8409	1907	0.344989	1	0
1142	RF	5687	902	0.55818	1	0			44856	RF	8411	2312	0.595726	1	0
1143	RF	5768	646	0.76111	1	0			44857	RF	8433	2383	0.467761	1	0
1144	RF	5774	775	0.664535	1	0			44858	RF	8438	1930	0.539848	1	0
1145	RF	5776	835	0.569197	1	0			44859	RF	8451	2330	0.517129	1	0
1146	RF	5779	631	0.550088	1	0			44860	RF	8455	1988	0.129927	1	0
1147	RF	5814	839	0.560953	1	0			44861	RF	8460	2398	0.596137	1	0
1148	RF	5847	561	0.534121	1	0			44862	RF	8465	2023	0.380593	1	0
1149	RF	5907	564	0.546304	1	0			44863	RF	7472	2599	0.53187	1	0
1150	RF	5967	631	0.549343	1	0			44864	RF	7529	2204	0.463977	1	0
1151	RF	5663	726	0.602014	1	0			44865	RF	7533	2553	0.452476	1	0
1152	RF	5765	777	0.634564	1	0			44866	RF	7600	2163	0.173774	1	0
1153	RF	5777	922	0.620358	1	0			44867	RF	7621	2367	0.28882	1	0
1154	RF	5806	650	0.723117	1	0			44868	RF	7624	2462	0.409183	1	0
1155	RF	5825	914	0.66367	1	0			44869	RF	7632	2434	0.328102	1	0
1156	RF	5881	555	0.691504	1	0			44870	RF	7693	2556	0.640401	1	0
1157	RF	5895	655	0.470842	1	0			44871	RF	7702	2466	0.604436	1	0
1158	RF	1007	1726	0.675605	1	0			44872	RF	7708	2568	0.486736	1	0
1159	RF	990	1735	0.608151	1	0			44873	RF	7740	2642	0.048687	1	0
1160	RF	991	1336	0.166951	1	0			44874	RF	7762	2337	0.224731	1	0
1161	RF	1006	1737	0.603953	1	0			44875	RF	7789	2370	0.451695	1	0
1162	RF	1015	1383	0.399276	1	0			44876	RF	7801	2345	0.506973	1	0
1163	RF	1021	1430	0.724796	1	0			44877	RF	7813	2582	0.480125	1	0
1164	RF	1022	1307	0.536778	1	0			44878	RF	7816	2051	0.232559	1	0
1165	RF	985	1686	0.01	0	1			44879	RF	7826	1967	0.250917	1	0
1166	RF	992	1246	0.516923	1	0			44880	RF	7834	2224	0.425474	1	0
1167	RF	994	1031	0.334934	1	0			44881	RF	7837	2312	0.418233	1	0
1168	RF	1004	1880	0.334975	1	0			44882	RF	7864	2050	0.195861	1	0
1169	RF	1009	1619	0.306327	1	0			44883	RF	7874	2524	0.550581	1	0
1170	RF	1025	1693	0.074351	1	0			44884	RF	7894	2037	0.0393683	1	0
1171	RF	988	1257	0.544242	1	0			44885	RF	7928	2053	0.177312	1	0
1172	RF	991	1594	0.580757	1	0			44886	RF	7936	2075	0.163245	1	0
1173	RF	1000	1350	0.285596	1	0			44887	RF	7946	2346	0.52562	1	0
1174	RF	1004	1278	0.347574	1	0			44888	RF	7952	2209	0.397437	1	0
1175	RF	1023	1307	0.505499	1	0			44889	RF	7956	2578	0.429982	1	0
1176	RF	985	1686	0.000141157	0	1			44890	RF	7964	2207	0.507627	1	0
1177	RF	992	1245	0.534235	1	0			44891	RF	7967	1814	0.428467	1	0
1178	RF	991	1446	0.354187	1	0			44892	RF	7987	1930	0.158699	1	0
1179	RF	1002	1651	0.546771	1	0			44893	RF	7990	2456	0.392429	1	0
1180	RF	1004	1683	0.280717	1	0			44894	RF	8003	1929	0.435087	1	0
1181	RF	1014	1882	0.241324	1	0			44895	RF	8012	1910	0.193475	1	0
1182	RF	991	1747	0.553877	1	0			44896	RF	8023	2552	0.631679	1	0
1183	RF	1008	1287	0.341395	1	0			44897	RF	8036	1862	0.191376	1	0
1184	RF	1020	1343	0.449414	1	0			44898	RF	8068	2312	0.495308	1	0
1185	RF	1023	1433	0.698836	1	0			44899	RF	8070	2420	0.475313	1	0
1186	RF	1027	1446	0.590484	1	0			44900	RF	8078	1788	0.337292	1	0
1187	RF	1028	1008	0.505935	1	0			44901	RF	8093	2112	0.443957	1	0
1188	RF	998	1935	0.708627	1	0			44902	RF	8096	2313	0.0620051	1	0
1189	RF	999	1248	0.34587	1	0			44903	RF	8111	2267	0.578613	1	0
1190	RF	1008	1715	0.374128	1	0			44904	RF	8121	2252	0.513111	1	0
1191	RF	1008	1504	0.636544	1	0			44905	RF	8121	2293	0.239476	1	0
1192	RF	1016	1831	0.455	1	0			44906	RF	8131	2030	0.498787	1	0
1193	RF	1019	1280	0.508216	1	0			44907	RF	8139	2105	0.45546	1	0
1194	RF	985	1940	0.711834	1	0			44908	RF	8156	1964	0.30455	1	0
1195	RF	988	1625	0.820065	1	0			44909	RF	8161	2448	0.793254	1	0
1196	RF	1004	1526	0.808851	1	0			44910	RF	8171	2175	0.168558	1	0
1197	RF	1008	1342	0.373902	1	0			44911	RF	8254	2365	0.371392	1	0
1198	RF	1014	1229	0.666231	1	0			44912	RF	8265	2421	0.536488	1	0
1199	RF	1016	1370	0.408646	1	0			44913	RF	8269	2060	0.279741	1	0
1200	RF	1027	1149	0.052441	1	0			44914	RF	8280	1770	0.291654	1	0
1201	RF	990	1745	0.524628	1	0			44915	RF	8316	1806	0.34797	1	0
1202	RF	995	1258	0.481563	1	0			44916	RF	8326	2235	0.426064	1	0
1203	RF	1008	1270	0.440563	1	0			44917	RF	8341	2377	0.469812	1	0
1204	RF	1008	1318	0.713001	1	0			44918	RF	8349	1891	0.384401	1	0
1205	RF	1018	1279	0.605085	1	0			44919	RF	8350	2498	0.619694	1	0
1206	RF	1018	1768	0.474696	1	0			44920	RF	8355	2214	0.277722	1	0
1207	RF	1023	1433	0.698032	1	0			44921	RF	8360	1916	0.488014	1	0
1208	RF	1027	1449	0.633436	1	0			44922	RF	8362	2396	0.686264	1	0
1209	RF	1406	1124	0.231995	1	0			44923	RF	8373	2192	0.550566	1	0
1210	RF	995	1247	0.465341	1	0			44924	RF	8374	1805	0.374663	1	0
1211	RF	1009	1618	0.315522	1	0			44925	RF	8380	1811	0.483231	1	0
1212	RF	1021	1720	0.403753	1	0			44926	RF	8382	1949	0.316857	1	0
1213	RF	1021	1430	0.696167	1	0			44927	RF	8385	1883	0.70627	1	0
1214	RF	1047	1080	0.255188	1	0			44928	RF	8391	2359	0.546486	1	0
1215	RF	1047	1148	0.525616	1	0			44929	RF	8398	1966	0.599335	1	0
1216	RF	1051	1378	0.57907	1	0			44930	RF	8399	2029	0.0500236	1	0
1217	RF	1065	1635	0.620867	1	0			44931	RF	8401	1923	0.272435	1	0
1218	RF	1071	1111	0.302	1	0			44932	RF	8406	2355	0.256687	1	0
1219	RF	1081	1630	0.656365	1	0			44933	RF	8441	2303	0.586717	1	0
1220	RF	1082	1702	0.464689	1	0			44934	RF	7498	2477	0.232243	1	0
1221	RF	1098	1480	0.749254	1	0			44935	RF	7530	2266	0.366538	1	0
1222	RF	1125	1784	0.450931	1	0			44936	RF	7529	2395	0.202997	1	0
1223	RF	1134	1710	0.459142	1	0			44937	RF	7538	2403	0.29098	1	0
1224	RF	1138	1773	0.375503	1	0			44938	RF	7553	2190	0.481548	1	0
1225	RF	1153	1555	0.465966	1	0			44939	RF	7576	2596	0.599024	1	0
1226	RF	1157	1926	0.35999	1	0			44940	RF	7581	2134	0.0878734	1	0
1227	RF	1188	1310	0.572391	1	0			44941	RF	7599	2150	0.0700702	1	0
1228	RF	1206	1758	0.613762	1	0			44942	RF	7600	2600	0.570534	1	0
1229	RF	1214	1465	0.632603	1	0			44943	RF	7701	2455	0.594854	1	0
1230	RF	1217	1854	0.576432	1	0			44944	RF	7740	2410	0.515402	1	0
1231	RF	1222	1803	0.472229	1	0			44945	RF	7761	2639	0.613788	1	0
1232	RF	1247	1427	0.341842	1	0			44946	RF	7793	1955	0.280525	1	0
1233	RF	1253	1868	0.339185	1	0			44947	RF	7815	2550	0.346192	1	0
1234	RF	1256	1699	0.379744	0	1			44948	RF	7823	2109	0.24898	1	0
1235	RF	1298	1922	0.745494	1	0			44949	RF	7832	2378	0.480578	1	0
1236	RF	1313	1570	0.527754	1	0			44950	RF	7848	2526	0.735268	1	0
1237	RF	1318	1591	0.348332	1	0			44951	RF	7920	1889	0.154993	1	0
1238	RF	1324	1238	0.333166	1	0			44952	RF	7926	2323	0.532905	1	0
1239	RF	1325	1427	0.509558	1	0			44953	RF	7941	1955	0.445715	1	0
1240	RF	1326	1269	0.53495	1	0			44954	RF	7950	1806	0.197063	1	0
1241	RF	1333	948	0.354797	1	0			44955	RF	7955	2456	0.739185	1	0
1242	RF	1343	1766	0.467658	1	0			44956	RF	7956	2320	0.358932	1	0
1243	RF	1363	1931	0.717878	1	0			44957	RF	7994	1890	0.458329	1	0
1244	RF	1378	1620	0.577902	1	0			44958	RF	8005	2535	0.494275	1	0
1245	RF	1391	1844	0.563417	0	1			44959	RF	8011	1854	0.185454	1	0
1246	RF	1396	1606	0.67803	1	0			44960	RF	8028	1898	0.140877	1	0
1247	RF	1403	1140	0.0385196	1	0			44961	RF	8128	2517	0.460423	1	0
1248	RF	1427	1642	0.153403	0	1			44962	RF	8148	1962	0.448618	1	0
1249	RF	1445	1619	0.689661	1	0			44963	RF	8161	1802	0.340128	1	0
1250	RF	1454	1449	0.410259	1	0			44964	RF	8189	2432	0.346637	1	0
1251	RF	1464	1213	0.0855503	0	1			44965	RF	8203	2267	0.368731	1	0
1252	RF	1474	1809	0.417804	1	0			44966	RF	8226	2374	0.236809	1	0
1253	RF	1478	1883	0.266169	1	0			44967	RF	8238	2421	0.443858	1	0
1254	RF	1480	1577	0.686062	1	0			44968	RF	8256	1999	0.19202	1	0
1255	RF	1486	1030	0.194036	0	1			44969	RF	8323	2358	0.636636	1	0
1256	RF	1488	1084	0.66581	1	0			44970	RF	8324	2496	0.655152	1	0
1257	RF	1497	1714	0.502821	0	1			44971	RF	8355	2455	0.693294	1	0
1258	RF	1501	1856	0.812487	1	0			44972	RF	8362	2291	0.368527	1	0
1259	RF	1509	1555	0.266148	1	0			44973	RF	8405	2220	0.355299	1	0
1260	RF	1517	1575	0.203303	1	0			44974	RF	8408	1775	0.315619	1	0
1261	RF	1527	1300	0.59676	1	0			44975	RF	8408	1909	0.355068	1	0
1262	RF	1540	1597	0.193683	1	0			44976	RF	8409	1957	0.557129	1	0
1263	RF	1540	1718	0.739533	1	0			44977	RF	8423	1992	0.351137	1	0
1264	RF	1549	1257	0.687224	1	0			44978	RF	8464	2015	0.312531	1	0
1265	RF	1554	1696	0.888473	1	0			44979	RF	8469	1880	0.0861357	1	0
1266	RF	1558	1579	0.267425	1	0			44980	RF	8469	2231	0.322946	1	0
1267	RF	1558	1374	0.568744	1	0			44981	RF	8600	2034	0.634889	1	0
1268	RF	1564	1409	0.196261	0	1			44982	RF	8412	2383	0.53627	1	0
1269	RF	1567	1250	0.634676	1	0			44983	RF	8429	2425	0.519055	1	0
1270	RF	1576	1283	0.632056	1	0			44984	RF	8439	2383	0.52876	1	0
1271	RF	1575	1767	0.75456	1	0			44985	RF	8460	1914	0.289656	1	0
1272	RF	1578	1595	0.62953	1	0			44986	RF	8468	2181	0.288866	1	0
1273	RF	1580	1273	0.575111	1	0			44987	RF	8482	1844	0.333814	1	0
1274	RF	1587	1812	0.598514	1	0			44988	RF	8494	2173	0.53783	1	0
1275	RF	1588	1329	0.403055	0	1			44989	RF	8496	1897	0.258347	1	0
1276	RF	1636	1389	0.218837	1	0			44990	RF	8501	2218	0.268372	1	0
1277	RF	1639	1002	0.465222	1	0			44991	RF	8512	2313	0.500755	1	0
1278	RF	1644	1846	0.338269	1	0			44992	RF	8514	1863	0.268661	1	0
1279	RF	1646	1504	0.730471	1	0			44993	RF	8516	2299	0.461032	1	0
1280	RF	1656	1745	0.417678	1	0			44994	RF	8522	1794	0.371285	1	0
1281	RF	1672	1359	0.606593	1	0			44995	RF	8530	2247	0.341992	1	0
1282	RF	1677	1920	0.523301	0	1			44996	RF	8537	1940	0.135386	1	0
1283	RF	1683	1910	0.775094	1	0			44997	RF	8546	1951	0.578504	1	0
1284	RF	1703	1818	0.742994	1	0			44998	RF	8551	2088	0.43994	1	0
1285	RF	1721	1627	0.162371	0	1			44999	RF	8560	2222	0.125758	1	0
1286	RF	1740	1260	0.691215	1	0			45000	RF	8560	2287	0.508647	1	0
1287	RF	1753	1266	0.598793	0	1			45001	RF	8566	1905	0.577525	1	0
1288	RF	1777	1437	0.37796	1	0			45002	RF	8583	2200	0.42921	1	0
1289	RF	1785	1704	0.414766	1	0			45003	RF	8588	1859	0.000749612	1	0
1290	RF	1790	1294	0.332118	0	1			45004	RF	8589	2021	0.222955	1	0
1291	RF	1794	1493	0.376932	0	1			45005	RF	8589	2341	0.463676	1	0
1292	RF	1795	1321	0.53841	1	0			45006	RF	8591	1945	0.428775	1	0
1293	RF	1805	1713	0.635688	1	0			45007	RF	8601	2195	0.48765	1	0
1294	RF	1807	1682	0.371074	0	1			45008	RF	8609	2382	0.612669	1	0
1295	RF	1816	1202	0.348601	1	0			45009	RF	8612	2075	0.565429	1	0
1296	RF	1828	1827	0.383585	1	0			45010	RF	8617	1833	0.337763	1	0
1297	RF	1835	1161	0.51261	1	0			45011	RF	8641	2022	0.648831	1	0
1298	RF	1845	965	0.522487	1	0			45012	RF	8648	2070	0.460889	1	0
1299	RF	1848	1817	0.700065	1	0			45013	RF	8662	1883	0.0899128	1	0
1300	RF	1850	1449	0.13953	1	0			45014	RF	8670	2273	0.275601	0	1
1301	RF	1850	1726	0.831744	1	0			45015	RF	8709	1961	0.254028	0	1
1302	RF	1855	997	0.239587	0	1			45016	RF	8432	1818	0.382114	1	0
1303	RF	1875	1898	0.238967	1	0			45017	RF	8446	2300	0.586693	1	0
1304	RF	1879	1803	0.626008	1	0			45018	RF	8462	1962	0.363252	1	0
1305	RF	1884	1928	0.448869	1	0			45019	RF	8476	2011	0.499975	1	0
1306	RF	1900	1921	0.670181	1	0			45020	RF	8481	2349	0.522727	1	0
1307	RF	1918	1798	0.744242	1	0			45021	RF	8489	2243	0.515516	1	0
1308	RF	1922	1771	0.28421	1	0			45022	RF	8494	1824	0.32703	1	0
1309	RF	1928	1916	0.32431	1	0			45023	RF	8497	2152	0.717643	1	0
1310	RF	1932	987	0.285227	1	0			45024	RF	8512	1775	0.273904	1	0
1311	RF	1951	1817	0.646251	1	0			45025	RF	8515	1985	0.175688	1	0
1312	RF	994	1451	0.382828	1	0			45026	RF	8521	1816	0.736102	1	0
1313	RF	994	1033	0.357784	1	0			45027	RF	8531	2273	0.395974	1	0
1314	RF	1003	1279	0.391152	1	0			45028	RF	8532	2233	0.391008	1	0
1315	RF	1004	1879	0.374227	1	0			45029	RF	8536	2364	0.488898	1	0
1316	RF	1028	1010	0.728493	1	0			45030	RF	8537	2120	0.721385	1	0
1317	RF	1038	1126	0.676365	1	0			45031	RF	8556	2198	0.623744	1	0
1318	RF	1045	1799	0.560803	1	0			45032	RF	8560	2250	0.580906	1	0
1319	RF	1057	1147	0.430701	1	0			45033	RF	8567	2212	0.287999	1	0
1320	RF	1088	1882	0.507405	0	1			45034	RF	8580	2126	0.254489	1	0
1321	RF	1090	1503	0.0268285	1	0			45035	RF	8585	2388	0.318248	1	0
1322	RF	1098	1629	0.280058	1	0			45036	RF	8590	2358	0.43988	1	0
1323	RF	1113	1787	0.594037	1	0			45037	RF	8605	2330	0.493796	1	0
1324	RF	1167	1296	0.452607	1	0			45038	RF	8670	2022	0.601785	1	0
1325	RF	1167	1465	0.390911	1	0			45039	RF	8718	1877	0.633101	1	0
1326	RF	1188	1714	0.69224	1	0			45040	RF	8435	2267	0.577878	1	0
1327	RF	1189	1482	0.678028	1	0			45041	RF	8451	2004	0.348906	1	0
1328	RF	1200	1580	0.897172	1	0			45042	RF	8480	1871	0.304193	1	0
1329	RF	1204	1842	0.417725	1	0			45043	RF	8493	1849	0.619838	1	0
1330	RF	1214	1163	0.700156	1	0			45044	RF	8495	1896	0.293776	1	0
1331	RF	1233	1793	0.556015	1	0			45045	RF	8496	1953	0.343865	1	0
1332	RF	1241	1805	0.404667	1	0			45046	RF	8514	1863	0.282252	1	0
1333	RF	1242	1788	0.697058	1	0			45047	RF	8514	2256	0.60188	1	0
1334	RF	1256	1610	0.499342	0	1			45048	RF	8518	1849	0.328835	1	0
1335	RF	1258	1090	0.699461	1	0			45049	RF	8520	2297	0.531567	1	0
1336	RF	1276	1416	0.744573	1	0			45050	RF	8524	2197	0.360464	1	0
1337	RF	1320	1002	0.267416	1	0			45051	RF	8536	2330	0.603373	1	0
1338	RF	1321	1306	0.831262	1	0			45052	RF	8537	1786	0.581953	1	0
1339	RF	1339	1366	0.640037	1	0			45053	RF	8543	1807	0.379683	1	0
1340	RF	1367	1646	0.447812	1	0			45054	RF	8552	2029	0.324556	1	0
1341	RF	1396	1480	0.0335076	1	0			45055	RF	8554	1955	0.494559	1	0
1342	RF	1454	1381	0.433846	1	0			45056	RF	8554	2359	0.439967	1	0
1343	RF	1457	1631	0.627791	1	0			45057	RF	8569	1821	0.416763	1	0
1344	RF	1463	1030	0.579526	1	0			45058	RF	8577	2324	0.683739	1	0
1345	RF	1462	1275	0.569769	1	0			45059	RF	8588	2341	0.338127	1	0
1346	RF	1471	1374	0.657076	1	0			45060	RF	8591	2020	0.213742	1	0
1347	RF	1472	1729	0.00265429	1	0			45061	RF	8591	1944	0.3651	1	0
1348	RF	1473	1518	0.351057	1	0			45062	RF	8594	1927	0.509977	1	0
1349	RF	1476	1680	0.694319	1	0			45063	RF	8618	1833	0.295005	1	0
1350	RF	1486	1750	0.468836	0	1			45064	RF	8617	2232	0.660014	1	0
1351	RF	1491	1460	0.64559	1	0			45065	RF	8619	2042	0.483763	1	0
1352	RF	1493	1354	0.666684	1	0			45066	RF	8626	1939	0.24101	1	0
1353	RF	1498	1530	0.390331	1	0			45067	RF	8649	2069	0.577784	1	0
1354	RF	1501	1889	0.480632	1	0			45068	RF	8680	1800	0.380834	1	0
1355	RF	1513	1473	0.518675	1	0			45069	RF	8420	2182	0.462134	1	0
1356	RF	1518	1074	0.460386	1	0			45070	RF	8427	2416	0.370442	1	0
1357	RF	1518	1521	0.526068	1	0			45071	RF	8438	2208	0.486716	1	0
1358	RF	1518	1705	0.453942	1	0			45072	RF	8449	1976	0.541175	1	0
1359	RF	1519	1865	0.542507	1	0			45073	RF	8462	2398	0.618336	1	0
1360	RF	1527	1386	0.280474	0	1			45074	RF	8489	2244	0.450966	1	0
1361	RF	1532	1669	0.539595	1	0			45075	RF	8520	2231	0.322196	1	0
1362	RF	1534	1294	0.619986	1	0			45076	RF	8530	2247	0.170981	1	0
1363	RF	1534	1502	0.516428	1	0			45077	RF	8532	1940	0.399015	1	0
1364	RF	1536	1326	0.681677	1	0			45078	RF	8574	2454	0.568942	1	0
1365	RF	1545	1666	0.586565	1	0			45079	RF	8575	2175	0.478498	1	0
1366	RF	1546	1586	0.0733989	1	0			45080	RF	8579	2388	0.233194	1	0
1367	RF	1549	1077	0.320832	0	1			45081	RF	8581	2285	0.387838	1	0
1368	RF	1551	1350	0.707188	1	0			45082	RF	8600	2094	0.606496	1	0
1369	RF	1557	1709	0.840198	1	0			45083	RF	8609	1989	0.576471	1	0
1370	RF	1576	1089	0.624576	1	0			45084	RF	8612	1976	0.689413	1	0
1371	RF	1593	1118	0.629483	1	0			45085	RF	8633	2349	0.478134	1	0
1372	RF	1604	1602	0.546497	1	0			45086	RF	8649	1911	0.352607	1	0
1373	RF	1607	1172	0.379827	1	0			45087	RF	8659	1831	0.475324	1	0
1374	RF	1612	1258	0.650622	1	0			45088	RF	8406	2292	0.606341	1	0
1375	RF	1618	1658	0.571224	1	0			45089	RF	8425	2026	0.360012	1	0
1376	RF	1619	1102	0.3583	1	0			45090	RF	8431	1962	0.45654	1	0
1377	RF	1623	1399	0.574326	1	0			45091	RF	8444	1800	0.35325	1	0
1378	RF	1623	1641	0.218179	1	0			45092	RF	8451	2160	0.521533	1	0
1379	RF	1631	1321	0.426476	1	0			45093	RF	8499	2341	0.303375	1	0
1380	RF	1656	1159	0.618276	1	0			45094	RF	8501	2211	0.113454	1	0
1381	RF	1661	1018	0.605839	1	0			45095	RF	8518	2310	0.284654	1	0
1382	RF	1661	1902	0.458001	1	0			45096	RF	8519	1812	0.637995	1	0
1383	RF	1662	1441	0.0234542	1	0			45097	RF	8521	1929	0.71989	1	0
1384	RF	1667	1038	0.409075	1	0			45098	RF	8530	1899	0.381093	1	0
1385	RF	1768	1668	0.309138	0	1			45099	RF	8545	2066	0.541242	1	0
1386	RF	1773	1872	0.556556	1	0			45100	RF	8567	2240	0.599976	1	0
1387	RF	1780	1908	0.143866	0	1			45101	RF	8569	2071	0.410147	1	0
1388	RF	1822	1682	0.420207	0	1			45102	RF	8571	2007	0.324738	1	0
1389	RF	1827	1486	0.376828	1	0			45103	RF	8575	2397	0.391954	1	0
1390	RF	1830	1319	0.579935	1	0			45104	RF	8586	2074	0.388712	1	0
1391	RF	1860	971	0.67892	1	0			45105	RF	8596	2367	0.422099	1	0
1392	RF	1864	1520	0.474537	1	0			45106	RF	8634	1844	0.469263	1	0
1393	RF	1871	1788	0.326843	0	1			45107	RF	8644	1817	0.245131	1	0
1394	RF	1874	1555	0.6909	1	0			45108	RF	8660	1949	0.388303	1	0
1395	RF	1889	1890	0.694802	1	0			45109	RF	8669	2023	0.525467	1	0
1396	RF	1893	1773	0.586797	1	0			45110	RF	8705	1839	0.71691	1	0
1397	RF	1896	1008	0.376717	1	0			45111	RF	8705	1950	0.598247	1	0
1398	RF	1920	1849	0.611335	1	0			45112	RF	8706	1862	0.509015	1	0
1399	RF	1922	1243	0.519178	1	0			45113	RF	8408	1907	0.276868	1	0
1400	RF	1940	1725	0.759239	1	0			45114	RF	8409	2313	0.558236	1	0
1401	RF	983	1403	0.611953	1	0			45115	RF	8482	2398	0.554849	1	0
1402	RF	985	1781	0.686727	1	0			45116	RF	8485	1944	0.248887	1	0
1403	RF	1002	1349	0.206372	1	0			45117	RF	8488	2246	0.241225	1	0
1404	RF	1007	1932	0.624049	1	0			45118	RF	8489	2184	0.416483	1	0
1405	RF	1009	1619	0.283739	1	0			45119	RF	8506	1948	0.415558	1	0
1406	RF	1014	1386	0.301296	1	0			45120	RF	8514	2258	0.56229	1	0
1407	RF	1022	1432	0.679109	1	0			45121	RF	8545	2435	0.290883	1	0
1408	RF	1044	1540	0.577643	1	0			45122	RF	8553	2123	0.11615	1	0
1409	RF	1045	1144	0.627028	1	0			45123	RF	8572	2173	0.537675	1	0
1410	RF	1051	1378	0.485221	1	0			45124	RF	8575	2388	0.300783	1	0
1411	RF	1056	1687	0.352679	0	1			45125	RF	8586	2410	0.530434	1	0
1412	RF	1064	1273	0.159905	1	0			45126	RF	8603	2250	0.400784	1	0
1413	RF	1071	954	0.389042	1	0			45127	RF	8608	1755	0.156946	1	0
1414	RF	1096	1860	0.65244	1	0			45128	RF	8619	2021	0.637835	1	0
1415	RF	1121	974	0.023608	1	0			45129	RF	8626	1883	0.205688	1	0
1416	RF	1127	1785	0.452502	1	0			45130	RF	8628	2063	0.457892	1	0
1417	RF	1133	1709	0.50844	1	0			45131	RF	8643	1770	0.360568	1	0
1418	RF	1149	1356	0.568801	1	0			45132	RF	8658	1832	0.544434	1	0
1419	RF	1158	1620	0.533743	1	0			45133	RF	8661	1755	0.477868	1	0
1420	RF	1158	1702	0.417854	1	0			45134	RF	8695	2102	0.652149	1	0
1421	RF	1162	1546	0.601387	1	0			45135	RF	8398	1967	0.580154	1	0
1422	RF	1164	1428	0.700225	1	0			45136	RF	8399	2030	0.0694219	1	0
1423	RF	1166	1597	0.495047	1	0			45137	RF	8424	1751	0.00115039	1	0
1424	RF	1195	1888	0.229149	0	1			45138	RF	8432	1962	0.383115	1	0
1425	RF	1219	1883	0.0459193	0	1			45139	RF	8435	1931	0.424198	1	0
1426	RF	1221	1572	0.846165	1	0			45140	RF	8440	2303	0.534833	1	0
1427	RF	1254	1885	0.536821	1	0			45141	RF	8449	2330	0.509264	1	0
1428	RF	1289	1532	0.625833	1	0			45142	RF	8453	1988	0.112843	1	0
1429	RF	1291	1913	0.468621	1	0			45143	RF	8463	2023	0.449597	1	0
1430	RF	1297	1368	0.324445	1	0			45144	RF	8499	2380	0.672142	1	0
1431	RF	1303	1730	0.594143	1	0			45145	RF	8502	1973	0.392124	1	0
1432	RF	1308	1737	0.466306	1	0			45146	RF	8507	1787	0.29448	1	0
1433	RF	1318	1591	0.215552	1	0			45147	RF	8508	1893	0.422451	1	0
1434	RF	1333	946	0.353452	1	0			45148	RF	8515	1954	0.333024	1	0
1435	RF	1337	1557	0.698525	1	0			45149	RF	8519	2480	0.44548	1	0
1436	RF	1360	1347	0.675526	1	0			45150	RF	8537	2012	0.194013	1	0
1437	RF	1363	1384	0.648904	1	0			45151	RF	8557	2164	0.538441	1	0
1438	RF	1369	1317	0.642588	1	0			45152	RF	8558	1858	0.435193	1	0
1439	RF	1392	1844	0.448641	0	1			45153	RF	8561	2031	0.469617	1	0
1440	RF	1396	1607	0.759501	1	0			45154	RF	8562	1967	0.528159	1	0
1441	RF	1396	1641	0.727756	1	0			45155	RF	8577	1994	0.317799	1	0
1442	RF	1406	1123	0.222779	1	0			45156	RF	8585	2074	0.275681	1	0
1443	RF	1406	1859	0.801485	1	0			45157	RF	8587	1811	0.27532	1	0
1444	RF	1413	1707	0.541701	1	0			45158	RF	8595	2368	0.366932	1	0
1445	RF	1419	1634	0.471747	1	0			45159	RF	8627	1958	0.4356	1	0
1446	RF	1428	1618	0.702873	1	0			45160	RF	8630	2210	0.620988	1	0
1447	RF	1432	988	0.60681	1	0			45161	RF	8635	1890	0.240704	1	0
1448	RF	1433	1256	0.608996	1	0			45162	RF	8652	1994	0.50098	1	0
1449	RF	1445	1311	0.481018	1	0			45163	RF	8705	2097	0.542445	1	0
1450	RF	1454	1449	0.386224	1	0			45164	RF	8727	1992	0.665335	1	0
1451	RF	1456	1072	0.552935	1	0			45165	RF	8397	2180	0.186645	1	0
1452	RF	1455	1663	0.67743	1	0			45166	RF	8400	1924	0.312293	1	0
1453	RF	1461	1084	0.495699	1	0			45167	RF	8405	2220	0.298155	1	0
1454	RF	1461	1852	0.346808	0	1			45168	RF	8431	2383	0.367541	1	0
1455	RF	1464	1214	0.131627	0	1			45169	RF	8468	2231	0.359368	1	0
1456	RF	1473	1705	0.540638	1	0			45170	RF	8485	1944	0.253637	1	0
1457	RF	1490	1086	0.642997	1	0			45171	RF	8485	2275	0.432445	1	0
1458	RF	1501	1654	0.582728	1	0			45172	RF	8501	2287	0.25305	1	0
1459	RF	1521	1820	0.666233	1	0			45173	RF	8529	2012	0.156821	1	0
1460	RF	1548	1257	0.745734	1	0			45174	RF	8530	2148	0.531993	1	0
1461	RF	1559	1656	0.747239	1	0			45175	RF	8534	1924	0.369198	1	0
1462	RF	1566	1251	0.668638	1	0			45176	RF	8537	2339	0.534649	1	0
1463	RF	1598	1583	0.643807	1	0			45177	RF	8537	2473	0.17113	1	0
1464	RF	1608	1090	0.736819	1	0			45178	RF	8545	1966	0.251813	1	0
1465	RF	1620	1170	0.268814	1	0			45179	RF	8572	2410	0.369711	1	0
1466	RF	1627	1677	0.428011	0	1			45180	RF	8573	2173	0.477152	1	0
1467	RF	1630	1108	0.634843	1	0			45181	RF	8575	2398	0.463604	1	0
1468	RF	1633	1168	0.596547	1	0			45182	RF	8581	2099	0.545415	1	0
1469	RF	1634	1548	0.118265	1	0			45183	RF	8585	2006	0.427232	1	0
1470	RF	1636	1390	0.231047	1	0			45184	RF	8593	1992	0.514887	1	0
1471	RF	1652	1662	0.325744	1	0			45185	RF	8607	1861	0.01	1	0
1472	RF	1659	1514	0.694229	1	0			45186	RF	8606	2229	0.530824	1	0
1473	RF	1664	1369	0.659181	1	0			45187	RF	8624	2070	0.529234	1	0
1474	RF	1663	1822	0.661068	1	0			45188	RF	8634	1843	0.455045	1	0
1475	RF	1682	1908	0.860044	1	0			45189	RF	8635	2042	0.547237	1	0
1476	RF	1685	1834	0.600439	1	0			45190	RF	8642	1927	0.333413	1	0
1477	RF	1691	1822	0.5355	1	0			45191	RF	8684	1788	0.284889	0	1
1478	RF	1694	1857	0.560193	1	0			45192	RF	8716	1829	0.862654	1	0
1479	RF	1697	1800	0.597473	1	0			45193	RF	7310	2715	0.740907	1	0
1480	RF	1703	1737	0.344687	0	1			45194	RF	7337	2711	0.551115	1	0
1481	RF	1712	1421	0.361364	1	0			45195	RF	7206	2723	0.508185	1	0
1482	RF	1715	1738	0.483703	0	1			45196	RF	7350	2725	0.506436	1	0
1483	RF	1720	1276	0.787938	1	0			45197	IOBe/C	7799	2729	0.662136	1	0
1484	RF	1733	1708	0.60818	1	0			45198	IOBe/C	7979	2766	0.046684	0	1
1485	RF	1740	1258	0.6722	1	0			45199	IOBe/C	8013	2700	0.631978	1	0
1486	RF	1739	1716	0.622347	1	0			45200	IOBe/C	8264	2664	0.144916	0	1
1487	RF	1750	1677	0.729742	1	0			45201	IOBe/C	8313	2640	0.737675	1	0
1488	RF	1750	1886	0.15285	1	0			45202	IOBe/C	8405	2608	0.521304	1	0
1489	RF	1763	1343	0.366445	1	0			45203	IOBe/C	7816	2705	0.739994	1	0
1490	RF	1787	1172	0.451245	1	0			45204	IOBe/C	8042	2756	0.0981257	0	1
1491	RF	1791	1858	0.742888	1	0			45205	IOBe/C	8071	2738	0.627694	1	0
1492	RF	1792	1490	0.324508	0	1			45206	IOBe/C	8172	2737	0.530469	1	0
1493	RF	1804	1712	0.67507	1	0			45207	IOBe/C	8229	2745	0.147814	0	1
1494	RF	1851	1816	0.772691	1	0			45208	IOBe/C	8307	2728	0.766021	1	0
1495	RF	1853	1864	0.469305	1	0			45209	IOBe/C	8342	2636	0.629156	1	0
1496	RF	1865	954	0.587051	1	0			45210	IOBe/C	8345	2746	0.707176	1	0
1497	RF	1880	1680	0.387133	1	0			45211	IOBe/C	8361	2576	0.509122	1	0
1498	RF	1903	1822	0.529517	1	0			45212	IOBe/C	8391	2610	0.0390152	0	1
1499	RF	1915	1867	0.461743	1	0			45213	IOBe/C	8469	2673	0.235432	0	1
1500	RF	1926	1828	0.59182	1	0			45214	IOBe/C	7698	2748	0.564818	1	0
1501	RF	1954	998	0.546096	1	0			45215	IOBe/C	7843	2746	0.0908915	0	1
1502	RF	988	1687	0.00299308	0	1			45216	IOBe/C	7956	2709	0.556478	1	0
1503	RF	989	1259	0.370759	1	0			45217	IOBe/C	7991	2729	0.681034	1	0
1504	RF	990	1620	0.799827	1	0			45218	IOBe/C	8009	2697	0.528214	1	0
1505	RF	992	1594	0.553621	1	0			45219	IOBe/C	8058	2740	0.765752	1	0
1506	RF	997	1247	0.337915	1	0			45220	IOBe/C	8163	2620	0.832926	1	0
1507	RF	1007	1699	0.51462	1	0			45221	IOBe/C	8221	2684	0.802377	1	0
1508	RF	1016	1831	0.440006	1	0			45222	IOBe/C	8279	2708	0.542663	1	0
1509	RF	1020	1343	0.404421	1	0			45223	IOBe/C	8317	2695	0.2902	0	1
1510	RF	1039	1126	0.59947	1	0			45224	IOBe/C	8438	2696	0.760691	1	0
1511	RF	1045	1757	0.378124	1	0			45225	IOBe/C	8461	2764	0.337918	1	0
1512	RF	1057	1236	0.341732	1	0			45226	IOBe/C	7941	2667	0.667532	1	0
1513	RF	1059	1148	0.47664	1	0			45227	IOBe/C	8017	2728	0.341333	0	1
1514	RF	1061	1179	0.711637	1	0			45228	IOBe/C	8070	2738	0.67664	1	0
1515	RF	1069	1288	0.528888	1	0			45229	IOBe/C	8081	2643	0.694076	1	0
1516	RF	1069	1628	0.555763	1	0			45230	IOBe/C	8184	2654	0.691037	1	0
1517	RF	1152	1554	0.428494	1	0			45231	IOBe/C	8267	2641	0.434098	0	1
1518	RF	1167	1464	0.335044	1	0			45232	IOBe/C	8392	2608	0.000412099	0	1
1519	RF	1171	1613	0.469981	1	0			45233	IOBe/C	8391	2741	0.0435885	1	0
1520	RF	1180	1781	0.226801	0	1			45234	IOBe/C	8421	2563	0.534562	1	0
1521	RF	1186	1717	0.7118	1	0			45235	IOBe/C	8304	2659	0.70543	1	0
1522	RF	1199	1578	0.871999	1	0			45236	IOBe/C	8312	2657	0.800292	1	0
1523	RF	1209	1559	0.509473	1	0			45237	IOBe/C	7959	2710	0.655248	1	0
1524	RF	1219	1797	0.58146	1	0			45238	IOBe/C	8226	2675	0.834787	1	0
1525	RF	1223	1696	0.457216	1	0			45239	IOBe/C	8242	2649	0.533892	1	0
1526	RF	1233	1793	0.584348	1	0			45240	IOBe/C	8447	2575	0.0347898	0	1
1527	RF	1253	936	0.43168	1	0			45241	IOBe/C	7969	2763	0.20011	0	1
1528	RF	1257	1701	0.264772	0	1			45242	IOBe/C	8000	2699	0.338848	1	0
1529	RF	1258	1091	0.676462	1	0			45243	IOBe/C	8024	2644	0.804794	1	0
1530	RF	1266	1164	0.495473	1	0			45244	IOBe/C	8025	2681	0.483139	0	1
1531	RF	1277	1877	0.519547	1	0			45245	IOBe/C	8129	2737	0.351992	0	1
1532	RF	1287	1511	0.76955	1	0			45246	IOBe/C	8250	2721	0.36963	0	1
1533	RF	1326	1269	0.309526	1	0			45247	IOBe/C	8270	2640	0.279648	0	1
1534	RF	1333	1603	0.530978	1	0			45248	IOBe/C	8311	2657	0.767569	1	0
1535	RF	1354	1792	0.281564	1	0			45249	IOBe/C	8316	2627	0.460055	0	1
1536	RF	1367	954	0.224831	1	0			45250	IOBe/C	8375	2665	0.692626	1	0
1537	RF	1373	1603	0.513927	1	0			45251	IOBe/C	7966	2723	0.478831	0	1
1538	RF	1376	1342	0.757975	1	0			45252	IOBe/C	8281	2663	0.284465	0	1
1539	RF	1382	1641	0.780583	1	0			45253	IOBe/C	8403	2734	0.0505975	0	1
1540	RF	1417	1074	0.642321	1	0			45254	IOBe/C	8411	2556	0.37452	1	0
1541	RF	1419	1559	0.597634	1	0			45255	IOBe/C	8543	2550	0.382415	1	0
1542	RF	1424	1798	0.695562	1	0			45256	IOBe/C	8556	2503	0.632262	1	0
1543	RF	1426	1642	0.143197	0	1			45257	IOBe/C	8420	2561	0.448918	1	0
1544	RF	1437	1807	0.443414	1	0			45258	IOBe/C	8478	2596	0.552625	1	0
1545	RF	1452	1724	0.74097	1	0			45259	IOBe/C	8487	2582	0.329886	0	1
1546	RF	1456	1635	0.548022	1	0			45260	IOBe/C	8493	2709	0.367183	0	1
1547	RF	1463	1707	0.39429	1	0			45261	IOBe/C	8522	2723	0.705313	1	0
1548	RF	1475	1153	0.783126	1	0			45262	IOBe/C	8467	2670	0.200143	0	1
1549	RF	1476	1679	0.733412	1	0			45263	IOBe/C	8509	2593	0.227408	0	1
1550	RF	1482	1330	0.758881	1	0			45264	IOBe/C	8513	2579	0.357082	0	1
1551	RF	1497	1772	0.424347	1	0			45265	IOBe/C	8525	2528	0.743974	1	0
1552	RF	1500	1844	0.634315	1	0			45266	IOBe/C	8421	2563	0.532457	1	0
1553	RF	1521	1305	0.70737	1	0			45267	IOBe/C	8534	2728	0.378604	0	1
1554	RF	1523	1277	0.681124	1	0			45268	IOBe/C	8441	2691	0.608911	1	0
1555	RF	1528	1089	0.253199	0	1			45269	IOBe/C	8554	2731	0.309859	1	0
1556	RF	1533	1866	0.244504	0	1			45270	IOBe/C	8472	2578	0.0995452	0	1
1557	RF	1538	1328	0.699866	1	0			45271	IOBe/C	8481	2623	0.125311	0	1
1558	RF	1542	1382	0.275919	0	1			45272	IOBe/C	8510	2751	0.20973	0	1
1559	RF	1554	1274	0.53606	1	0			45273	IOBe/C	8558	2688	0.451006	1	0
1560	RF	1562	1831	0.465705	0	1			45274	IOBe/C	8516	2609	0.184963	0	1
1561	RF	1564	1409	0.0517289	0	1			45275	IOBe/C	8568	2745	0.50341	1	0
1562	RF	1610	1791	0.809833	1	0			45276	IOBe/C	8445	2575	0.0625812	0	1
1563	RF	1612	1256	0.544766	1	0			45277	IOBe/C	8525	2735	0.284399	0	1
1564	RF	1622	1915	0.595669	1	0			45278	IOBe/C	6901	3615	0.381987	1	0
1565	RF	1638	1356	0.668894	1	0			45279	IOBe/C	7366	3646	0.688311	1	0
1566	RF	1642	1759	0.597649	1	0			45280	IOBe/C	7427	3272	0.277898	1	0
1567	RF	1645	1654	0.362778	1	0			45281	IOBe/C	7453	3104	0.01	1	0
1568	RF	1647	1028	0.583253	1	0			45282	IOBe/C	7468	3492	0.374211	0	1
1569	RF	1651	1128	0.399161	1	0			45283	IOBe/C	6648	3437	0.11085	1	0
1570	RF	1656	1620	0.587977	1	0			45284	IOBe/C	6711	3215	0.670863	1	0
1571	RF	1660	1018	0.519863	1	0			45285	IOBe/C	6738	3572	0.361475	1	0
1572	RF	1662	1905	0.607801	1	0			45286	IOBe/C	6750	3294	0.547971	1	0
1573	RF	1676	1827	0.607997	1	0			45287	IOBe/C	6787	3381	0.0463735	1	0
1574	RF	1694	1881	0.547873	1	0			45288	IOBe/C	6822	3623	0.544693	1	0
1575	RF	1719	1379	0.646489	0	1			45289	IOBe/C	6869	3644	0.315448	1	0
1576	RF	1728	1925	0.730017	1	0			45290	IOBe/C	6912	3609	0.190085	1	0
1577	RF	1731	1639	0.367617	1	0			45291	IOBe/C	6921	3579	0.13707	1	0
1578	RF	1733	1910	0.512084	1	0			45292	IOBe/C	6957	3224	0.327039	1	0
1579	RF	1776	1777	0.620818	1	0			45293	IOBe/C	6971	3281	0.148411	0	1
1580	RF	1782	1787	0.578041	1	0			45294	IOBe/C	7034	3126	0.0395199	1	0
1581	RF	1786	1775	0.731257	1	0			45295	IOBe/C	7038	2991	0.50719	1	0
1582	RF	1816	1203	0.356814	1	0			45296	IOBe/C	7040	3582	0.593264	1	0
1583	RF	1820	1836	0.547251	1	0			45297	IOBe/C	7070	3234	0.154805	1	0
1584	RF	1825	1484	0.410575	1	0			45298	IOBe/C	7071	3627	0.223466	1	0
1585	RF	1866	1601	0.485768	1	0			45299	IOBe/C	7081	3126	0.224303	1	0
1586	RF	1874	1034	0.209244	1	0			45300	IOBe/C	7111	3124	0.0346229	1	0
1587	RF	1874	1555	0.654927	1	0			45301	IOBe/C	7126	3669	0.0981253	1	0
1588	RF	1883	1847	0.699092	1	0			45302	IOBe/C	7141	3027	0.126449	0	1
1589	RF	1890	972	0.282233	0	1			45303	IOBe/C	7143	3706	0.0155454	1	0
1590	RF	1902	1740	0.518177	1	0			45304	IOBe/C	7151	3135	0.235064	1	0
1591	RF	1912	1795	0.758057	1	0			45305	IOBe/C	7168	3560	0.382357	1	0
1592	RF	1919	1600	0.529922	1	0			45306	IOBe/C	7198	3379	0.691902	1	0
1593	RF	1923	1678	0.658317	1	0			45307	IOBe/C	7204	3057	0.0998411	0	1
1594	RF	1939	1855	0.696074	1	0			45308	IOBe/C	7233	3204	0.689559	1	0
1595	RF	1940	1725	0.659566	1	0			45309	IOBe/C	7242	3191	0.648405	1	0
1596	RF	1940	1837	0.570831	1	0			45310	IOBe/C	7251	3288	0.455633	1	0
1597	RF	1951	1813	0.577931	1	0			45311	IOBe/C	7259	3162	0.1278	1	0
1598	RF	1957	959	0.581574	1	0			45312	IOBe/C	7272	3469	0.473447	1	0
1599	RF	985	1700	0.531725	1	0			45313	IOBe/C	7299	3136	0.357822	1	0
1600	RF	986	1779	0.763994	1	0			45314	IOBe/C	7310	3118	0.274982	1	0
1601	RF	1001	1843	0.571899	1	0			45315	IOBe/C	7334	3176	0.159699	0	1
1602	RF	1003	1682	0.168173	1	0			45316	IOBe/C	7406	3127	0.803887	1	0
1603	RF	1007	1714	0.317629	1	0			45317	IOBe/C	7421	2929	0.380371	0	1
1604	RF	1016	1369	0.405496	1	0			45318	IOBe/C	7423	3225	0.040299	1	0
1605	RF	1039	1256	0.71508	1	0			45319	IOBe/C	7431	3515	0.791273	1	0
1606	RF	1064	1274	0.167773	1	0			45320	IOBe/C	7444	3341	0.01	1	0
1607	RF	1074	1065	0.49537	1	0			45321	IOBe/C	7456	3337	0.205115	1	0
1608	RF	1079	1220	0.593886	1	0			45322	IOBe/C	7468	3307	0.0233211	0	1
1609	RF	1082	984	0.486228	1	0			45323	IOBe/C	7484	3209	0.0425573	0	1
1610	RF	1087	991	0.507044	1	0			45324	IOBe/C	7488	3046	0.502526	1	0
1611	RF	1149	1355	0.579627	1	0			45325	IOBe/C	7524	3555	0.379133	1	0
1612	RF	1167	1295	0.428026	1	0			45326	IOBe/C	7532	3408	0.01	1	0
1613	RF	1172	1509	0.222761	1	0			45327	IOBe/C	7533	3239	0.530631	1	0
1614	RF	1197	1791	0.675243	1	0			45328	IOBe/C	7535	2944	0.354123	1	0
1615	RF	1206	1759	0.409951	1	0			45329	IOBe/C	6741	3481	0.0546107	0	1
1616	RF	1240	1075	0.470174	1	0			45330	IOBe/C	6812	3414	0.215383	1	0
1617	RF	1241	1176	0.508313	1	0			45331	IOBe/C	6838	3697	0.01	1	0
1618	RF	1241	1559	0.6146	1	0			45332	IOBe/C	6866	3251	0.0192955	1	0
1619	RF	1243	1789	0.590955	1	0			45333	IOBe/C	6891	3410	0.218348	1	0
1620	RF	1245	1164	0.481629	1	0			45334	IOBe/C	6932	3657	0.157401	1	0
1621	RF	1247	1847	0.437788	1	0			45335	IOBe/C	6966	3573	0.291672	1	0
1622	RF	1251	944	0.450287	1	0			45336	IOBe/C	7017	3514	0.270693	1	0
1623	RF	1258	1446	0.383604	1	0			45337	IOBe/C	7061	3271	0.346708	1	0
1624	RF	1262	1920	0.771251	1	0			45338	IOBe/C	7081	3327	0.24085	0	1
1625	RF	1273	1171	0.452985	1	0			45339	IOBe/C	7084	3223	0.0364051	1	0
1626	RF	1282	1606	0.551054	1	0			45340	IOBe/C	7104	3328	0.55193	1	0
1627	RF	1284	1817	0.384015	0	1			45341	IOBe/C	7152	3074	0.117975	0	1
1628	RF	1288	1532	0.75368	1	0			45342	IOBe/C	7161	3058	0.109067	1	0
1629	RF	1291	1221	0.721078	1	0			45343	IOBe/C	7206	3680	0.178256	1	0
1630	RF	1304	1728	0.562174	1	0			45344	IOBe/C	7207	3347	0.00101328	0	1
1631	RF	1307	1648	0.656499	1	0			45345	IOBe/C	7213	3520	0.169181	1	0
1632	RF	1314	1343	0.590584	1	0			45346	IOBe/C	7263	3042	0.0316321	1	0
1633	RF	1334	1811	0.538458	1	0			45347	IOBe/C	7366	3088	0.376512	1	0
1634	RF	1336	1471	0.232777	1	0			45348	IOBe/C	7380	3656	0.0218536	1	0
1635	RF	1339	1365	0.500505	1	0			45349	IOBe/C	7384	3066	0.20146	1	0
1636	RF	1344	1651	0.539324	1	0			45350	IOBe/C	7385	3440	0.031368	0	1
1637	RF	1346	1508	0.145186	1	0			45351	IOBe/C	7388	2979	0.0021747	1	0
1638	RF	1346	1745	0.639297	1	0			45352	IOBe/C	7414	3319	0.19714	1	0
1639	RF	1353	1597	0.504167	1	0			45353	IOBe/C	7424	3337	0.0153051	0	1
1640	RF	1368	1635	0.555139	1	0			45354	IOBe/C	7436	2832	0.1835	0	1
1641	RF	1386	934	0.405355	1	0			45355	IOBe/C	7440	3616	0.576875	1	0
1642	RF	1396	1885	0.521429	1	0			45356	IOBe/C	7482	2951	0.0367978	1	0
1643	RF	1396	1927	0.636893	1	0			45357	IOBe/C	7516	3385	0.261828	0	1
1644	RF	1406	971	0.235915	1	0			45358	IOBe/C	7557	3270	0.19734	0	1
1645	RF	1407	1672	0.699381	1	0			45359	IOBe/C	6648	3438	0.0670383	1	0
1646	RF	1407	1698	0.616628	1	0			45360	IOBe/C	6699	3463	0.238006	1	0
1647	RF	1409	999	0.599937	1	0			45361	IOBe/C	6705	3560	0.149947	1	0
1648	RF	1412	1644	0.502322	1	0			45362	IOBe/C	6750	3294	0.625159	1	0
1649	RF	1419	1634	0.565396	1	0			45363	IOBe/C	6808	3324	0.191946	1	0
1650	RF	1422	1616	0.761339	1	0			45364	IOBe/C	6809	3188	0.00591498	1	0
1651	RF	1423	1441	0.362208	1	0			45365	IOBe/C	6828	3665	0.0165044	1	0
1652	RF	1424	975	0.59014	1	0			45366	IOBe/C	6843	3442	0.618552	1	0
1653	RF	1432	1254	0.609951	1	0			45367	IOBe/C	6844	3684	0.01	1	0
1654	RF	1438	1446	0.406826	0	1			45368	IOBe/C	6846	3488	0.119678	1	0
1655	RF	1444	1650	0.65473	1	0			45369	IOBe/C	6921	3488	0.235071	1	0
1656	RF	1447	1312	0.455576	1	0			45370	IOBe/C	6937	3485	0.464937	1	0
1657	RF	1458	1404	0.565825	1	0			45371	IOBe/C	6999	3162	0.101499	1	0
1658	RF	1460	1852	0.4104	0	1			45372	IOBe/C	7008	3557	0.631557	1	0
1659	RF	1473	1705	0.456424	1	0			45373	IOBe/C	7031	3437	0.52063	1	0
1660	RF	1502	1857	0.780625	1	0			45374	IOBe/C	7037	3529	0.130697	1	0
1661	RF	1504	1822	0.593179	1	0			45375	IOBe/C	7043	3434	0.382866	1	0
1662	RF	1508	1317	0.533037	1	0			45376	IOBe/C	7082	3126	0.221726	1	0
1663	RF	1512	1332	0.595903	1	0			45377	IOBe/C	7108	3236	0.539246	1	0
1664	RF	1524	1287	0.758695	1	0			45378	IOBe/C	7115	3060	0.674505	1	0
1665	RF	1541	1822	0.583886	1	0			45379	IOBe/C	7116	3209	0.107578	0	1
1666	RF	1547	1852	0.388912	1	0			45380	IOBe/C	7128	3249	0.728486	1	0
1667	RF	1555	1475	0.596568	1	0			45381	IOBe/C	7130	3524	0.0822194	1	0
1668	RF	1555	1580	0.229384	1	0			45382	IOBe/C	7145	3101	0.0422675	0	1
1669	RF	1556	1375	0.669563	1	0			45383	IOBe/C	7170	3445	0.175895	1	0
1670	RF	1565	1251	0.63112	1	0			45384	IOBe/C	7207	3258	0.174338	1	0
1671	RF	1578	1882	0.679452	1	0			45385	IOBe/C	7215	3270	0.0214194	0	1
1672	RF	1621	1656	0.523683	1	0			45386	IOBe/C	7230	3257	0.688929	1	0
1673	RF	1643	1050	0.328408	0	1			45387	IOBe/C	7263	3196	0.452645	0	1
1674	RF	1668	1812	0.657739	1	0			45388	IOBe/C	7263	3341	0.283724	1	0
1675	RF	1670	1544	0.4729	1	0			45389	IOBe/C	7310	3142	0.0571712	1	0
1676	RF	1681	1859	0.52781	1	0			45390	IOBe/C	7350	2865	0.474862	1	0
1677	RF	1684	1834	0.576399	1	0			45391	IOBe/C	7351	2999	0.712812	1	0
1678	RF	1708	1598	0.333482	1	0			45392	IOBe/C	7361	3014	0.10893	0	1
1679	RF	1711	1174	0.740864	1	0			45393	IOBe/C	7375	3201	0.0130434	0	1
1680	RF	1713	1932	0.58818	1	0			45394	IOBe/C	7379	3481	0.0413297	0	1
1681	RF	1723	1400	0.368564	0	1			45395	IOBe/C	7386	3145	0.310845	0	1
1682	RF	1733	1934	0.507114	1	0			45396	IOBe/C	7394	2915	0.409048	1	0
1683	RF	1738	1716	0.696802	1	0			45397	IOBe/C	7394	3678	1.1e-05	1	0
1684	RF	1741	1797	0.518239	1	0			45398	IOBe/C	7427	3272	0.255564	1	0
1685	RF	1760	1935	0.763986	1	0			45399	IOBe/C	7441	3421	0.01	1	0
1686	RF	1764	968	0.336037	1	0			45400	IOBe/C	7457	3339	0.0934255	1	0
1687	RF	1767	1667	0.113781	0	1			45401	IOBe/C	7478	3110	0.0776098	0	1
1688	RF	1791	1858	0.726417	1	0			45402	IOBe/C	7496	3391	0.355278	1	0
1689	RF	1810	1731	0.659326	1	0			45403	IOBe/C	7525	3554	0.399925	1	0
1690	RF	1815	1747	0.689388	1	0			45404	IOBe/C	7525	3701	0.373933	1	0
1691	RF	1848	1726	0.875131	1	0			45405	IOBe/C	7533	3239	0.651824	1	0
1692	RF	1853	1337	0.297856	1	0			45406	IOBe/C	7533	3409	0.01	1	0
1693	RF	1860	971	0.668579	1	0			45407	IOBe/C	6819	3331	0.106063	1	0
1694	RF	1864	954	0.644246	1	0			45408	IOBe/C	6855	3468	0.49031	1	0
1695	RF	1891	998	0.279532	1	0			45409	IOBe/C	6895	3471	0.811646	1	0
1696	RF	1903	1919	0.684998	1	0			45410	IOBe/C	6930	3658	0.0533577	1	0
1697	RF	1905	1216	0.509028	1	0			45411	IOBe/C	6932	3632	0.18475	1	0
1698	RF	1918	1850	0.712904	1	0			45412	IOBe/C	6952	3232	0.286394	1	0
1699	RF	1924	1827	0.547631	1	0			45413	IOBe/C	6989	3263	0.248061	1	0
1700	RF	1928	1756	0.479929	1	0			45414	IOBe/C	7017	3514	0.158687	1	0
1701	RF	1931	1618	0.557541	1	0			45415	IOBe/C	7040	3598	0.0533626	1	0
1702	RF	1938	1031	0.363836	1	0			45416	IOBe/C	7049	3531	0.29018	1	0
1703	RF	1955	1733	0.337491	1	0			45417	IOBe/C	7062	3002	0.578102	1	0
1704	RF	1957	1896	0.723477	1	0			45418	IOBe/C	7098	2955	0.155524	1	0
1705	RF	994	1260	0.427118	1	0			45419	IOBe/C	7103	3291	0.681853	1	0
1706	RF	997	1934	0.699811	1	0			45420	IOBe/C	7108	3159	0.01	1	0
1707	RF	1019	1343	0.366187	1	0			45421	IOBe/C	7125	3226	0.0136827	1	0
1708	RF	1023	1433	0.653844	1	0			45422	IOBe/C	7137	3031	0.026612	0	1
1709	RF	1031	1258	0.645848	1	0			45423	IOBe/C	7149	3420	0.0522376	1	0
1710	RF	1032	991	0.453049	1	0			45424	IOBe/C	7151	3207	0.00421243	1	0
1711	RF	1043	1723	0.275388	1	0			45425	IOBe/C	7199	3378	0.450035	1	0
1712	RF	1045	1143	0.69292	1	0			45426	IOBe/C	7215	3058	0.195525	1	0
1713	RF	1063	1062	0.455332	1	0			45427	IOBe/C	7233	3203	0.619631	1	0
1714	RF	1064	1117	0.423719	1	0			45428	IOBe/C	7243	3322	0.01	0	1
1715	RF	1064	1224	0.624063	1	0			45429	IOBe/C	7243	3356	0.39577	1	0
1716	RF	1068	938	0.42927	1	0			45430	IOBe/C	7256	3252	0.618403	1	0
1717	RF	1074	1240	0.543449	1	0			45431	IOBe/C	7257	3061	0.0705194	0	1
1718	RF	1074	1534	0.502145	1	0			45432	IOBe/C	7289	3454	0.0318582	0	1
1719	RF	1097	1859	0.690311	1	0			45433	IOBe/C	7299	3136	0.293014	1	0
1720	RF	1162	1772	0.593359	1	0			45434	IOBe/C	7324	3190	0.170986	0	1
1721	RF	1165	1598	0.393645	1	0			45435	IOBe/C	7325	3138	0.175406	1	0
1722	RF	1170	1798	0.519722	1	0			45436	IOBe/C	7325	3425	0.163272	1	0
1723	RF	1188	1483	0.67864	1	0			45437	IOBe/C	7326	3154	0.0679138	0	1
1724	RF	1190	1689	0.383156	0	1			45438	IOBe/C	7347	3260	0.424157	1	0
1725	RF	1202	1502	0.722767	1	0			45439	IOBe/C	7362	3462	0.480492	1	0
1726	RF	1213	1723	0.456641	1	0			45440	IOBe/C	7391	3100	0.141504	1	0
1727	RF	1234	1622	0.649729	1	0			45441	IOBe/C	7424	3457	0.325713	0	1
1728	RF	1251	1858	0.554348	1	0			45442	IOBe/C	7439	2983	0.332403	1	0
1729	RF	1283	1298	0.669198	1	0			45443	IOBe/C	7488	3301	0.17799	1	0
1730	RF	1298	1780	0.594091	1	0			45444	IOBe/C	7511	3291	0.00952998	1	0
1731	RF	1301	1369	0.374712	1	0			45445	IOBe/C	7527	3693	0.275131	1	0
1732	RF	1303	1229	0.498196	1	0			45446	IOBe/C	6699	3464	0.166041	1	0
1733	RF	1325	1173	0.579594	1	0			45447	IOBe/C	6705	3561	0.104352	1	0
1734	RF	1353	1792	0.24228	1	0			45448	IOBe/C	6748	3276	0.0508657	1	0
1735	RF	1359	1147	0.230433	1	0			45449	IOBe/C	6748	3354	0.399914	1	0
1736	RF	1361	1227	0.451236	1	0			45450	IOBe/C	6797	3423	0.177514	1	0
1737	RF	1362	1383	0.650268	1	0			45451	IOBe/C	6801	3514	0.01	1	0
1738	RF	1364	1106	0.664305	1	0			45452	IOBe/C	6844	3442	0.553865	1	0
1739	RF	1369	1318	0.64938	1	0			45453	IOBe/C	6844	3684	0.01	1	0
1740	RF	1370	1799	0.376309	0	1			45454	IOBe/C	6879	3301	0.398608	1	0
1741	RF	1375	1341	0.706355	1	0			45455	IOBe/C	6941	3606	0.580124	1	0
1742	RF	1406	989	0.521531	1	0			45456	IOBe/C	7000	3161	0.18797	1	0
1743	RF	1408	1653	0.812465	1	0			45457	IOBe/C	7057	3541	0.0186899	1	0
1744	RF	1417	1075	0.609914	1	0			45458	IOBe/C	7118	2938	0.298602	0	1
1745	RF	1427	1010	0.366784	1	0			45459	IOBe/C	7129	3593	0.211859	1	0
1746	RF	1430	1678	0.600131	1	0			45460	IOBe/C	7129	3706	0.186487	1	0
1747	RF	1451	1454	0.237847	1	0			45461	IOBe/C	7169	3491	0.229319	1	0
1748	RF	1455	1291	0.536054	1	0			45462	IOBe/C	7191	3530	0.157349	1	0
1749	RF	1457	1168	0.543329	1	0			45463	IOBe/C	7214	3521	0.183439	1	0
1750	RF	1462	1708	0.27743	1	0			45464	IOBe/C	7229	3258	0.5409	1	0
1751	RF	1473	1372	0.497333	1	0			45465	IOBe/C	7251	3024	0.00260962	1	0
1752	RF	1495	1318	0.607587	1	0			45466	IOBe/C	7263	3196	0.369972	0	1
1753	RF	1495	1805	0.653509	1	0			45467	IOBe/C	7305	3188	0.376214	1	0
1754	RF	1498	1332	0.611919	1	0			45468	IOBe/C	7340	3418	0.414686	0	1
1755	RF	1505	1535	0.577726	1	0			45469	IOBe/C	7376	2978	0.142801	1	0
1756	RF	1506	1591	0.600676	1	0			45470	IOBe/C	7381	3457	0.0207452	1	0
1757	RF	1521	1278	0.699695	1	0			45471	IOBe/C	7391	3008	0.0134678	1	0
1758	RF	1521	1820	0.656108	1	0			45472	IOBe/C	7392	3016	1.72e-05	1	0
1759	RF	1537	1328	0.45248	1	0			45473	IOBe/C	7405	3535	3.5e-07	1	0
1760	RF	1546	1089	0.560684	1	0			45474	IOBe/C	7438	3021	7.55e-05	0	1
1761	RF	1557	1628	0.683328	1	0			45475	IOBe/C	7457	3340	0.016582	1	0
1762	RF	1559	1711	0.692541	1	0			45476	IOBe/C	7463	3598	0.209584	0	1
1763	RF	1563	1120	0.523479	1	0			45477	IOBe/C	7483	3127	0.366271	0	1
1764	RF	1575	1169	0.368744	1	0			45478	IOBe/C	7489	3683	0.740225	1	0
1765	RF	1591	1118	0.425733	1	0			45479	IOBe/C	7491	3472	0.0190145	1	0
1766	RF	1592	992	0.467387	1	0			45480	IOBe/C	7498	3394	0.136012	1	0
1767	RF	1610	1280	0.748345	1	0			45481	IOBe/C	7514	3463	0.0416902	1	0
1768	RF	1610	1790	0.795464	1	0			45482	IOBe/C	7531	3207	0.388624	1	0
1769	RF	1632	1875	0.403967	1	0			45483	IOBe/C	7541	3039	0.0810423	1	0
1770	RF	1638	1356	0.673927	1	0			45484	IOBe/C	7549	3634	0.199581	1	0
1771	RF	1646	1028	0.566775	1	0			45485	IOBe/C	6796	3678	0.216975	1	0
1772	RF	1658	1618	0.510908	1	0			45486	IOBe/C	6818	3622	0.0219133	1	0
1773	RF	1660	1370	0.619901	1	0			45487	IOBe/C	6837	3505	0.00176726	1	0
1774	RF	1662	1824	0.610449	1	0			45488	IOBe/C	6876	3467	0.161316	1	0
1775	RF	1667	1038	0.438131	1	0			45489	IOBe/C	6878	3375	0.142986	1	0
1776	RF	1678	1875	0.809602	1	0			45490	IOBe/C	6880	3582	0.01	1	0
1777	RF	1710	1899	0.648381	1	0			45491	IOBe/C	6896	3467	0.762092	1	0
1778	RF	1716	1736	0.283667	0	1			45492	IOBe/C	6901	3503	0.0830857	1	0
1779	RF	1722	1287	0.528155	1	0			45493	IOBe/C	6906	3494	0.01	1	0
1780	RF	1739	1117	0.518572	1	0			45494	IOBe/C	6910	3708	0.156887	1	0
1781	RF	1740	1252	0.578456	1	0			45495	IOBe/C	6927	3483	0.619292	1	0
1782	RF	1749	1905	0.466707	1	0			45496	IOBe/C	6944	3584	0.0571977	1	0
1783	RF	1750	1678	0.756281	1	0			45497	IOBe/C	6988	3260	0.302124	1	0
1784	RF	1755	1912	0.644775	1	0			45498	IOBe/C	7022	3176	0.703042	1	0
1785	RF	1756	1347	0.547012	1	0			45499	IOBe/C	7103	3536	0.01	1	0
1786	RF	1759	1309	0.479899	0	1			45500	IOBe/C	7104	3626	0.269573	1	0
1787	RF	1761	1862	0.566142	1	0			45501	IOBe/C	7107	3251	0.585099	1	0
1788	RF	1786	1775	0.753402	1	0			45502	IOBe/C	7133	3020	0.00924632	0	1
1789	RF	1799	1440	0.0458348	1	0			45503	IOBe/C	7148	3236	0.0381927	0	1
1790	RF	1820	1836	0.613016	1	0			45504	IOBe/C	7190	3514	0.0169581	1	0
1791	RF	1822	1640	0.627478	1	0			45505	IOBe/C	7194	3678	0.149783	1	0
1792	RF	1823	1483	0.369731	1	0			45506	IOBe/C	7214	3177	0.0671041	1	0
1793	RF	1835	1817	0.577449	1	0			45507	IOBe/C	7216	3642	0.261591	1	0
1794	RF	1883	1817	0.686639	1	0			45508	IOBe/C	7220	3544	0.373695	1	0
1795	RF	1884	1794	0.610423	1	0			45509	IOBe/C	7232	3572	0.0878405	0	1
1796	RF	1885	1749	0.516102	0	1			45510	IOBe/C	7233	3521	0.345873	1	0
1797	RF	1912	1736	0.654132	1	0			45511	IOBe/C	7254	3490	0.01	1	0
1798	RF	1917	1770	0.772661	1	0			45512	IOBe/C	7256	3061	0.0505518	0	1
1799	RF	1935	1884	0.585937	1	0			45513	IOBe/C	7261	3345	0.244325	1	0
1800	RF	1940	1837	0.589272	1	0			45514	IOBe/C	7357	3635	0.751619	1	0
1801	RF	1955	1810	0.773243	1	0			45515	IOBe/C	7365	3086	0.326898	1	0
1802	RF	987	973	0.341076	1	0			45516	IOBe/C	7386	3283	0.0387132	1	0
1803	RF	989	1625	0.786899	1	0			45517	IOBe/C	7399	2921	0.325773	1	0
1804	RF	991	1746	0.611272	1	0			45518	IOBe/C	7404	2947	0.449903	1	0
1805	RF	999	1249	0.229169	1	0			45519	IOBe/C	7423	3337	0.0206467	0	1
1806	RF	1004	1526	0.758352	1	0			45520	IOBe/C	7429	3367	0.00286609	0	1
1807	RF	1010	1342	0.239424	1	0			45521	IOBe/C	7452	2847	0.630905	1	0
1808	RF	1016	1768	0.462089	1	0			45522	IOBe/C	7510	3128	0.413916	1	0
1809	RF	1026	1151	0.048372	1	0			45523	IOBe/C	7512	3290	0.0329844	1	0
1810	RF	1027	1449	0.626119	1	0			45524	IOBe/C	7521	3016	0.184893	0	1
1811	RF	1032	1801	0.479611	1	0			45525	IOBe/C	6717	3475	0.119802	1	0
1812	RF	1035	1911	0.421701	1	0			45526	IOBe/C	6724	3225	0.503193	1	0
1813	RF	1059	1785	0.623912	1	0			45527	IOBe/C	6737	3553	0.02517	1	0
1814	RF	1060	1179	0.663722	1	0			45528	IOBe/C	6794	3640	0.286285	1	0
1815	RF	1125	963	0.561634	1	0			45529	IOBe/C	6835	3184	0.106792	1	0
1816	RF	1141	1314	0.553741	1	0			45530	IOBe/C	6882	3298	0.171143	1	0
1817	RF	1173	1510	0.189127	1	0			45531	IOBe/C	6931	3073	0.5023	1	0
1818	RF	1184	1579	0.534494	1	0			45532	IOBe/C	6940	3487	0.20486	1	0
1819	RF	1185	1537	0.469292	1	0			45533	IOBe/C	7012	3602	0.00272629	1	0
1820	RF	1185	1848	0.468264	1	0			45534	IOBe/C	7067	3332	0.603963	1	0
1821	RF	1193	1772	0.578033	1	0			45535	IOBe/C	7099	2955	0.124556	1	0
1822	RF	1202	1834	0.499395	1	0			45536	IOBe/C	7118	2938	0.257835	0	1
1823	RF	1204	1866	0.457293	1	0			45537	IOBe/C	7129	3504	0.000401494	1	0
1824	RF	1233	1774	0.635504	1	0			45538	IOBe/C	7129	3706	0.195451	1	0
1825	RF	1242	1353	0.517745	1	0			45539	IOBe/C	7139	3511	0.0072842	1	0
1826	RF	1247	1410	0.42844	1	0			45540	IOBe/C	7144	3457	0.0414238	1	0
1827	RF	1249	1508	0.479865	1	0			45541	IOBe/C	7161	3578	0.206421	1	0
1828	RF	1262	1920	0.751924	1	0			45542	IOBe/C	7191	2976	0.434779	1	0
1829	RF	1265	1020	0.56463	1	0			45543	IOBe/C	7202	3360	0.719645	1	0
1830	RF	1271	1342	0.618305	1	0			45544	IOBe/C	7252	3232	0.719281	1	0
1831	RF	1280	1213	0.755163	1	0			45545	IOBe/C	7272	3216	0.0751784	1	0
1832	RF	1281	1797	0.603315	1	0			45546	IOBe/C	7284	3205	0.449186	1	0
1833	RF	1283	1859	0.468298	1	0			45547	IOBe/C	7312	3329	0.105957	0	1
1834	RF	1287	1512	0.801689	1	0			45548	IOBe/C	7369	3103	0.207358	1	0
1835	RF	1319	1752	0.559642	1	0			45549	IOBe/C	7371	3159	0.784785	1	0
1836	RF	1325	1520	0.365637	1	0			45550	IOBe/C	7375	2978	0.148568	1	0
1837	RF	1347	1746	0.654725	1	0			45551	IOBe/C	7377	3238	0.474513	1	0
1838	RF	1356	1243	0.0954598	0	1			45552	IOBe/C	7380	3044	0.0149245	0	1
1839	RF	1374	1921	0.557113	1	0			45553	IOBe/C	7396	2982	0.01	1	0
1840	RF	1380	1640	0.678191	1	0			45554	IOBe/C	7400	3489	0.0575373	0	1
1841	RF	1396	978	0.41779	1	0			45555	IOBe/C	7401	2890	0.116824	0	1
1842	RF	1398	1608	0.724698	1	0			45556	IOBe/C	7429	3032	0.0189381	0	1
1843	RF	1412	1812	0.26059	0	1			45557	IOBe/C	7457	3338	0.01	1	0
1844	RF	1413	1892	0.55108	1	0			45558	IOBe/C	7470	3480	0.01	1	0
1845	RF	1418	1478	0.542223	1	0			45559	IOBe/C	7483	3126	0.332645	0	1
1846	RF	1423	1441	0.371343	1	0			45560	IOBe/C	7487	3321	0.0713891	0	1
1847	RF	1425	975	0.59446	1	0			45561	IOBe/C	7523	3286	0.393906	1	0
1848	RF	1427	1618	0.800901	1	0			45562	IOBe/C	7543	3284	0.0104249	0	1
1849	RF	1438	1807	0.36752	1	0			45563	IOBe/C	7549	3633	0.235932	1	0
1850	RF	1438	1446	0.387042	0	1			45564	IOBe/C	6695	3571	0.000802665	1	0
1851	RF	1446	1650	0.640319	1	0			45565	IOBe/C	6706	3594	0.00491692	1	0
1852	RF	1453	1618	0.549498	1	0			45566	IOBe/C	6737	3212	0.0990402	1	0
1853	RF	1456	1663	0.528698	1	0			45567	IOBe/C	6789	3462	0.024624	1	0
1854	RF	1467	1824	0.122493	0	1			45568	IOBe/C	6795	3622	0.139621	1	0
1855	RF	1476	1152	0.754865	1	0			45569	IOBe/C	6827	3456	0.01	1	0
1856	RF	1486	1212	0.0763585	0	1			45570	IOBe/C	6850	3652	0.19145	1	0
1857	RF	1497	1554	0.544736	1	0			45571	IOBe/C	6868	3528	0.399877	1	0
1858	RF	1518	1798	0.308382	0	1			45572	IOBe/C	6870	3536	0.242894	1	0
1859	RF	1540	1822	0.598255	1	0			45573	IOBe/C	6908	3477	0.397591	1	0
1860	RF	1555	1273	0.52097	1	0			45574	IOBe/C	6908	3494	0.01	1	0
1861	RF	1556	1376	0.639713	1	0			45575	IOBe/C	6943	3584	0.0932833	1	0
1862	RF	1565	1251	0.563291	1	0			45576	IOBe/C	6986	3588	0.612684	1	0
1863	RF	1592	1033	0.44649	1	0			45577	IOBe/C	7063	3508	0.0605805	1	0
1864	RF	1602	1443	0.402519	0	1			45578	IOBe/C	7073	3448	0.188449	1	0
1865	RF	1606	1172	0.397411	1	0			45579	IOBe/C	7073	3623	0.0362982	1	0
1866	RF	1607	1855	0.598511	1	0			45580	IOBe/C	7078	3089	0.429468	1	0
1867	RF	1617	1821	0.738733	1	0			45581	IOBe/C	7100	3074	0.0399291	1	0
1868	RF	1621	1302	0.538795	1	0			45582	IOBe/C	7109	3251	0.447255	1	0
1869	RF	1622	1178	0.486028	1	0			45583	IOBe/C	7119	3695	0.0647465	1	0
1870	RF	1633	1170	0.598991	1	0			45584	IOBe/C	7125	3207	0.470417	1	0
1871	RF	1633	1840	0.441772	1	0			45585	IOBe/C	7135	3170	0.161079	1	0
1872	RF	1652	1807	0.616398	1	0			45586	IOBe/C	7164	3495	0.41502	1	0
1873	RF	1655	1837	0.817467	1	0			45587	IOBe/C	7176	2999	0.266539	1	0
1874	RF	1681	1859	0.597578	1	0			45588	IOBe/C	7200	3708	0.549323	1	0
1875	RF	1685	1843	0.655394	1	0			45589	IOBe/C	7215	3643	0.283952	1	0
1876	RF	1708	1598	0.301775	1	0			45590	IOBe/C	7235	3301	0.01	0	1
1877	RF	1722	1398	0.27159	0	1			45591	IOBe/C	7236	2969	0.220995	0	1
1878	RF	1729	1026	0.41766	1	0			45592	IOBe/C	7249	3315	0.090863	0	1
1879	RF	1740	1797	0.413352	1	0			45593	IOBe/C	7264	3036	0.000158129	1	0
1880	RF	1747	1867	0.614009	1	0			45594	IOBe/C	7284	3583	0.00440989	1	0
1881	RF	1764	967	0.361111	1	0			45595	IOBe/C	7293	3172	0.26194	1	0
1882	RF	1769	1799	0.454719	1	0			45596	IOBe/C	7368	3362	0.217356	1	0
1883	RF	1769	1871	0.643322	1	0			45597	IOBe/C	7382	3487	0.0500149	1	0
1884	RF	1786	1878	0.447618	1	0			45598	IOBe/C	7396	3290	0.01	1	0
1885	RF	1797	1761	0.70203	1	0			45599	IOBe/C	7399	2921	0.240923	1	0
1886	RF	1829	1538	0.742854	1	0			45600	IOBe/C	7404	2947	0.437681	1	0
1887	RF	1829	1663	0.595856	1	0			45601	IOBe/C	7420	3346	0.136557	0	1
1888	RF	1831	957	0.0781186	1	0			45602	IOBe/C	7421	2937	0.327379	0	1
1889	RF	1847	1726	0.888008	1	0			45603	IOBe/C	7423	3019	0.210985	0	1
1890	RF	1851	1815	0.605016	1	0			45604	IOBe/C	7497	3059	0.327522	0	1
1891	RF	1858	1891	0.59161	1	0			45605	IOBe/C	7557	3276	0.210227	1	0
1892	RF	1872	1035	0.115119	1	0			45606	IOBe/C	7612	3479	0.0311972	0	1
1893	RF	1890	999	0.324468	1	0			45607	IOBe/C	7719	3442	0.0705806	0	1
1894	RF	1899	1583	0.613124	1	0			45608	IOBe/C	7887	3572	0.01	0	1
1895	RF	1909	1827	0.57958	1	0			45609	IOBe/C	8396	2952	0.466007	1	0
1896	RF	1918	1852	0.676279	1	0			45610	IOBe/C	7518	3383	0.223656	0	1
1897	RF	1924	1840	0.577407	1	0			45611	IOBe/C	7534	2942	0.470189	1	0
1898	RF	1928	1755	0.501824	1	0			45612	IOBe/C	7557	3396	0.01	0	1
1899	RF	984	1700	0.554661	1	0			45613	IOBe/C	7578	3146	0.147854	1	0
1900	RF	1008	1504	0.717518	1	0			45614	IOBe/C	7648	3049	0.101876	0	1
1901	RF	1011	1272	0.534409	1	0			45615	IOBe/C	7649	2954	0.159263	0	1
1902	RF	1009	1320	0.656528	1	0			45616	IOBe/C	7650	3064	0.0251668	0	1
1903	RF	1013	1232	0.617759	1	0			45617	IOBe/C	7653	3131	0.167676	0	1
1904	RF	1016	1371	0.381713	1	0			45618	IOBe/C	7656	3079	0.188916	0	1
1905	RF	1031	1257	0.583424	1	0			45619	IOBe/C	7677	3119	0.147007	0	1
1906	RF	1041	1790	0.122941	0	1			45620	IOBe/C	7689	3408	0.366018	1	0
1907	RF	1044	1143	0.623457	1	0			45621	IOBe/C	7727	2926	0.454162	0	1
1908	RF	1060	1236	0.565923	1	0			45622	IOBe/C	7731	3483	0.0394569	0	1
1909	RF	1063	1061	0.53871	1	0			45623	IOBe/C	7746	2703	0.5014	1	0
1910	RF	1080	984	0.510816	1	0			45624	IOBe/C	7770	3115	0.102793	1	0
1911	RF	1133	1463	0.286661	1	0			45625	IOBe/C	7783	3218	0.19995	0	1
1912	RF	1174	1752	0.374886	1	0			45626	IOBe/C	7822	2889	0.256103	1	0
1913	RF	1184	1757	0.485798	1	0			45627	IOBe/C	7870	3142	0.361228	1	0
1914	RF	1188	1922	0.414537	1	0			45628	IOBe/C	7898	3687	0.01	0	1
1915	RF	1190	1723	0.511139	1	0			45629	IOBe/C	7929	2736	0.198482	0	1
1916	RF	1201	1497	0.722672	1	0			45630	IOBe/C	7933	3037	0.16778	0	1
1917	RF	1233	1623	0.676647	1	0			45631	IOBe/C	7944	3552	0.166696	1	0
1918	RF	1235	1637	0.72699	1	0			45632	IOBe/C	7949	3597	0.142907	0	1
1919	RF	1259	1446	0.482708	1	0			45633	IOBe/C	7957	3502	0.106705	1	0
1920	RF	1284	1299	0.649694	1	0			45634	IOBe/C	7959	3117	0.740435	1	0
1921	RF	1293	1202	0.621036	1	0			45635	IOBe/C	7967	3243	0.0818723	1	0
1922	RF	1317	1211	0.610756	1	0			45636	IOBe/C	7981	2965	0.01	0	1
1923	RF	1332	1636	0.532904	1	0			45637	IOBe/C	7989	3477	0.0901556	1	0
1924	RF	1334	1814	0.490267	1	0			45638	IOBe/C	8012	2699	0.572845	1	0
1925	RF	1361	1227	0.421507	1	0			45639	IOBe/C	8019	3192	0.408646	1	0
1926	RF	1363	1175	0.510848	1	0			45640	IOBe/C	8037	3494	0.0837255	0	1
1927	RF	1370	1799	0.352081	0	1			45641	IOBe/C	8055	3437	0.303975	1	0
1928	RF	1384	1153	0.628519	1	0			45642	IOBe/C	8067	3384	0.212599	0	1
1929	RF	1403	972	0.352658	1	0			45643	IOBe/C	8075	3053	0.00625882	0	1
1930	RF	1430	1678	0.493772	1	0			45644	IOBe/C	8084	3423	0.04021	0	1
1931	RF	1450	1682	0.360275	1	0			45645	IOBe/C	8088	2962	0.04906	0	1
1932	RF	1458	1170	0.505348	1	0			45646	IOBe/C	8117	3357	0.0324545	0	1
1933	RF	1477	1335	0.601371	1	0			45647	IOBe/C	8138	3399	0.137262	1	0
1934	RF	1494	1805	0.640558	1	0			45648	IOBe/C	8145	3062	0.239071	0	1
1935	RF	1514	1358	0.592544	1	0			45649	IOBe/C	8177	3145	0.138397	0	1
1936	RF	1553	1350	0.677749	1	0			45650	IOBe/C	8193	3248	0.142581	0	1
1937	RF	1564	1121	0.523276	1	0			45651	IOBe/C	8198	3530	0.618474	1	0
1938	RF	1575	1170	0.410037	1	0			45652	IOBe/C	8241	3350	0.216154	0	1
1939	RF	1578	1882	0.564425	1	0			45653	IOBe/C	8277	3600	0.213664	0	1
1940	RF	1596	1909	0.588961	1	0			45654	IOBe/C	8287	3509	0.322666	0	1
1941	RF	1659	1372	0.615329	1	0			45655	IOBe/C	8305	3578	0.361326	0	1
1942	RF	1682	1698	0.687169	1	0			45656	IOBe/C	8330	3287	0.0447548	0	1
1943	RF	1714	1069	0.576343	1	0			45657	IOBe/C	8333	2987	0.665359	1	0
1944	RF	1725	1924	0.53182	1	0			45658	IOBe/C	8346	2744	0.50365	1	0
1945	RF	1732	1858	0.76361	1	0			45659	IOBe/C	8355	3026	0.536358	1	0
1946	RF	1739	1717	0.730852	1	0			45660	IOBe/C	8384	3250	0.241301	0	1
1947	RF	1741	1252	0.535695	1	0			45661	IOBe/C	8387	2881	0.653766	1	0
1948	RF	1800	1441	0.0852094	1	0			45662	IOBe/C	8392	3493	0.485089	1	0
1949	RF	1821	1640	0.623524	1	0			45663	IOBe/C	8394	3408	0.01	0	1
1950	RF	1826	1838	0.672465	1	0			45664	IOBe/C	8423	3132	0.363721	1	0
1951	RF	1882	1818	0.639509	1	0			45665	IOBe/C	8423	3198	0.202493	0	1
1952	RF	1904	934	0.314937	1	0			45666	IOBe/C	8433	3696	0.601371	1	0
1953	RF	1935	1884	0.519783	1	0			45667	IOBe/C	8435	3447	0.57631	1	0
1954	RF	1941	1011	0.744501	1	0			45668	IOBe/C	8451	3207	0.580184	1	0
1955	RF	1948	1818	0.651302	1	0			45669	IOBe/C	8457	3561	0.0907301	0	1
1956	RF	1929	1559	0.0762437	0	1			45670	IOBe/C	8463	2744	0.209208	0	1
1957	RF	2544	1420	0.484265	1	0			45671	IOBe/C	8465	3125	0.370592	0	1
1958	RF	1897	1010	0.294988	1	0			45672	IOBe/C	7485	3208	0.0174474	0	1
1959	RF	1918	1797	0.79885	1	0			45673	IOBe/C	7524	3552	0.232946	1	0
1960	RF	1930	989	0.203794	1	0			45674	IOBe/C	7533	3238	0.660597	1	0
1961	RF	1940	1660	0.1965	1	0			45675	IOBe/C	7577	3121	0.0292014	1	0
1962	RF	1949	1813	0.736419	1	0			45676	IOBe/C	7592	3468	0.331416	0	1
1963	RF	1966	921	0.211262	0	1			45677	IOBe/C	7592	3616	0.01	0	1
1964	RF	1966	1243	0.310209	1	0			45678	IOBe/C	7593	3403	0.064878	1	0
1965	RF	1986	1899	0.194961	0	1			45679	IOBe/C	7618	2772	0.362998	1	0
1966	RF	2051	1892	0.629137	1	0			45680	IOBe/C	7630	3124	0.263312	1	0
1967	RF	2056	1740	0.268879	1	0			45681	IOBe/C	7634	3017	0.729587	1	0
1968	RF	2056	1754	0.0774588	0	1			45682	IOBe/C	7637	3633	0.189427	0	1
1969	RF	2071	1342	0.727822	1	0			45683	IOBe/C	7639	3459	0.0413693	1	0
1970	RF	2085	1690	0.597113	1	0			45684	IOBe/C	7728	3181	0.0767003	0	1
1971	RF	2095	1881	0.636236	1	0			45685	IOBe/C	7737	3111	0.268438	1	0
1972	RF	2130	1540	0.344824	0	1			45686	IOBe/C	7739	3022	0.126191	1	0
1973	RF	2138	1701	0.424979	1	0			45687	IOBe/C	7765	3218	0.118373	1	0
1974	RF	2144	1222	0.472144	1	0			45688	IOBe/C	7794	3260	0.215812	1	0
1975	RF	2154	1358	0.493215	1	0			45689	IOBe/C	7815	2707	0.666185	1	0
1976	RF	2170	1184	0.555582	1	0			45690	IOBe/C	7830	3185	0.480129	1	0
1977	RF	2176	972	0.381119	1	0			45691	IOBe/C	7835	3083	0.649842	1	0
1978	RF	2183	1134	0.587396	1	0			45692	IOBe/C	7842	2747	0.238564	0	1
1979	RF	2213	1330	0.550422	1	0			45693	IOBe/C	7854	3561	0.239999	0	1
1980	RF	2217	1136	0.436279	1	0			45694	IOBe/C	7884	3368	0.283437	0	1
1981	RF	2244	943	0.362616	1	0			45695	IOBe/C	7887	3409	3.52e-05	1	0
1982	RF	2250	1317	0.573487	1	0			45696	IOBe/C	7895	2956	0.769431	1	0
1983	RF	2251	976	0.534568	1	0			45697	IOBe/C	7906	3194	0.289814	0	1
1984	RF	2259	1165	0.484914	1	0			45698	IOBe/C	7920	2832	0.162132	0	1
1985	RF	2260	1187	0.337001	1	0			45699	IOBe/C	7921	3184	0.0789991	0	1
1986	RF	2270	935	0.514631	1	0			45700	IOBe/C	7929	2908	0.11901	0	1
1987	RF	2275	980	0.290074	1	0			45701	IOBe/C	7934	2771	0.149727	0	1
1988	RF	2290	1401	0.359412	1	0			45702	IOBe/C	7948	2829	0.175834	0	1
1989	RF	2294	1285	0.158129	1	0			45703	IOBe/C	7974	2820	0.204102	0	1
1990	RF	2303	1409	0.799383	1	0			45704	IOBe/C	7975	2990	0.0405576	0	1
1991	RF	2314	985	0.49918	1	0			45705	IOBe/C	7978	2767	0.0326872	0	1
1992	RF	2323	1224	0.639493	1	0			45706	IOBe/C	7978	2900	0.315115	0	1
1993	RF	2336	1549	0.763807	1	0			45707	IOBe/C	7981	3212	0.00045098	0	1
1994	RF	2339	958	0.609086	1	0			45708	IOBe/C	7982	2863	0.341494	0	1
1995	RF	2348	1579	0.59262	1	0			45709	IOBe/C	8011	3529	0.627832	1	0
1996	RF	2372	1155	0.723775	1	0			45710	IOBe/C	8016	3417	0.314692	0	1
1997	RF	2381	1595	0.720302	1	0			45711	IOBe/C	8041	3477	0.245408	0	1
[truncated: 41,717 more rows]
