# Supplementary material for: Cerebellar and vestibular nuclear synapses in the inferior olive have distinct release kinetics and neurotransmitters
Source: eLife. 2020 Dec 1;9:e61672. doi: 10.7554/eLife.61672 (PMC7707816; doi:10.7554/eLife.61672)
Supplement: Figure 2—source data 1. [file elife-61672-fig2-data1.xlsx]

## Sheet: Figure 2
Figure 2C									Figure 2G-H											Figure 2 - Figure supplement 1
Cell	GABA rise (ms)	GABA decay (ms)	Gly rise (ms)	Gly decay (ms)	Gly/GABA amp.	Gly/GABA charge			Glycine						GABA					Baseline				Gbz.
1	1.95	64.9363	0.95	6.29337	1.92721	0.191686			Cell	Subnucleus	Ave decay (ms)	Ave amp (pA)	Events/min		Cell	Ave decay (ms)	Ave amp (pA)			Event	Amplitude	Decay		Event	Amplitude	Decay
2	8.55	62.9316	1.5	4.80891	0.384698	0.0288482			1	DAO	7.83796	53.9973	23.395		1	27.2511	21.8086			1	55.7844	0.0775471		1	62.5953	0.00724137
3	12.35	129.232	0.1	6.06104	0.230353	0.0545677			2	DAO	3.41794	23.965	1.55139		2	32.3078	15.0548			2	41.7656	0.00876851		2	89.6031	0.00813262
4	15.7	86.3648	0.45	7.79514	1.35496	0.119742			3	DAO	3.38539	26.8661	0.310278		3	31.9773	16.0193			3	34.7109	0.137695		3	34.3969	0.00718148
5	4.15	68.0058	1.15	5.56131	0.93811	0.0397742			4	DAO	8.54502	29.3209	17.042		4	40.676	12.9553			4	12.8031	0.0183067		4	109.611	0.00671719
6	8.2	75.3777	1.65	5.00948	1.11787	0.104584			5	DAO	2.66883	23.528	5.27473		5	34.6072	12.8217			5	12.7984	0.0114393		5	81.1922	0.00569105
									6	DAO	3.85066	25.6979	0.155139		6	30.5214	15.6316			6	25.3391	0.0144535		6	104.378	0.00834268
									7	PIO	2.82982	18.325	0.310278		7	39.5585	19.1826			7	12.6609	0.0160454		7	76.5328	0.0048458
									8	DAO	5.40019	41.3854	0.424591		8	30.6526	19.9574			8	36.5844	0.011066		8	102.934	0.00736067
									9	DAO	6.88671	71.6999	0.849182		9	30.0207	20.1243			9	14.1859	0.00887109		9	66.6547	0.00618163
									10	DAO	2.27208	32.9665	5.33013		10	30.3133	16.3037			10	119.037	0.0181465		10	82.5672	0.0059787
									11	rMAO	3.29878	37.4995	0.432173		11	25.5763	14.4447			11	17.1016	0.00944359		11	21.5437	0.00683495
									12	cIOBe/C	12.8419	34.5674	21.916		12	19.4286	9.6861			12	23.8875	0.0263615		12	16.3578	0.013839
									13	IOB/A	4.39114	48.5192	67.8655		13	39.9417	9.38899			13	22.0125	0.0210867		13	52.3453	0.0058804
									14	IOB/A	3.36498	31.5353	179.092		14	39.3419	11.5537			14	13.6062	0.0676847		14	14.8484	0.0234559
									15	IOB/A	2.798	38.9499	83.6303		15	28.7727	13.2507			15	23.5797	0.0219682		15	77.9516	0.00599498
									16	cIOBe/C	1.90079	18.768	0.504202		16	25.5786	12.5888			16	14.5734	0.0395264		16	102.314	0.0091796
									17	cDCK	2.25742	24.444	2.82353		17	29.5604	15.7928			17	17.9719	0.0276195		17	85.65	0.0084974
									18	cDCK	1.96055	17.8477	0.252101		18	26.348	21.0819			18	16.5609	0.0656345		18	17.6391	0.00345394
									19	IOB/A	4.46468	28.5825	8.20168		19	27.5387	14.4726			19	17.9031	0.0195708		19	67.775	0.00644053
									20	IOB/A	4.35936	37.9762	15.2521		20	29.9737	10.4198			20	46.8484	0.0401666		20	94.0406	0.00808506
									21	rIOBe	2.62552	38.7013	28.5042		21	30.0269	9.58585			21	18.1187	0.0160829		21	97.0578	0.00778202
									22	cDCK	4.27123	35.1661	8.06723		22	44.0389	14.7394			22	53.1516	0.0265514		22	82.2016	0.00732871
									23	cIOBe/C	3.46223	33.4448	3.15126		23	38.94	13.5625			23	20.1406	0.0277747		23	97.2656	0.00645637
									24	cIOBe/C	3.57407	43.4458	9.0084		24	49.3277	8.97592			24	13.9094	0.0276597		24	59.8984	0.00544195
									25	IOB/A	3.8484	38.5053	33.2101		25	33.0779	14.0394			25	23.2828	0.01422		25	56.6234	0.0088931
									26	rIOBe	3.00577	34.3324	2.15126		26	21.0955	7.28471			26	38.5328	0.0246493		26	53	0.00280855
									27	rMAO	3.71169	19.7663	1.38655		27	28.4161	15.0295			27	107.973	0.0221524		27	60.0953	0.00407884
									28	rMAO	4.40361	26.7258	0.537815		28	39.889	11.3203			28	19.5297	0.0352848		28	64.2891	0.00706048
									29	DAO	2.44368	21.915	0.630252		29	24.8845	18.7011			29	49.6109	0.0332576		29	44.9937	0.00598229
									30	DAO	4.61279	49.5468	65.5462		30	30.8287	13.9333			30	14.1906	0.00730332		30	44.8188	0.00352343
									31	DAO	5.47893	27.3611	1.44058		31	41.5874	16.1518			31	18.6359	0.0147981		31	39.8516	0.00453779
									32	rIOBe	4.54953	40.9168	23.1933		32	30.7185	22.994			32	16.1391	0.0137746		32	16.9047	0.00586478
									33	rIOBe	5.51913	31.6187	7.79832		33	31.9358	14.6455			33	13.1141	0.0180283		33	19.3531	0.00167789
															34	39.3448	13.6453			34	35.9453	0.043074		34	100.545	0.00791462
															35	63.8514	18.5756			35	17.4	0.0413237		35	118.22	0.00837164
															36	30.2972	15.1449			36	39.1141	0.0186753		36	78.6203	0.00710689
															37	27.1077	16.6493			37	50.2953	0.0229528		37	97.9859	0.00619098
															38	59.0966	9.40854			38	31.4359	0.0351591		38	27.1219	0.00853917
															39	28.1122	24.8553			39	19.6453	0.00846099		39	30.5781	0.00321245
															40	41.6314	16.4289			40	23.4094	0.0722725		40	72.9969	0.00511839
															41	30.1475	15.1741			41	21.4172	0.0484857		41	95.0766	0.00815069
																				42	55.6422	0.0205552		42	58.3563	0.00754365
																				43	66.2453	0.0232509		43	88.7938	0.00777482
																				44	23.5844	0.019119		44	73.9344	0.00592374
																				45	55.8609	0.0183481		45	16.0078	0.0518393
																				46	27.8125	0.03071		46	18.1469	0.00572602
																				47	16.0531	0.0281472		47	83.3703	0.00830173
																				48	20.0016	0.018949		48	53.1109	0.00543273
																				49	12.9609	0.0524676		49	82.8766	0.00683462
																				50	22.9844	0.0353621		50	70.1531	0.012006
																				51	39.9547	0.0197576		51	13.6859	0.0590683
																				52	21.2797	0.0170677		52	24.6891	0.00633148
																				53	18.3984	0.0322671		53	102.308	0.00721743
																				54	20.7781	0.0365506		54	20.6266	0.00339756
																				55	15.0609	0.0300193		55	96.5141	0.00768823
																				56	25.9922	0.0308058		56	57.0219	0.00663319
																				57	21.1328	0.0138976		57	46.8687	0.00410102
																				58	116.62	0.0261508		58	61.6359	0.00569518
																				59	14.7922	0.0593346		59	29.2531	0.00482115
																				60	30.3328	0.0159737		60	92.7797	0.00727519
																				61	13.5172	0.152212		61	38.75	0.00414078
																				62	19.6078	0.0878815		62	79.3109	0.00634885
																				63	12.7469	0.0200856		63	22.95	0.0165489
																				64	19.9219	0.0106766		64	77.0125	0.00607027
																				65	36.0063	0.00963159		65	81.0984	0.00779423
																				66	20.7125	0.0166507		66	13.8688	0.0178882
																				67	20.1203	0.102152		67	72.2406	0.00582726
																				68	25.0531	0.019015		68	85.6406	0.00497442
																				69	22.6641	0.0166978		69	88.8297	0.00592685
																				70	35.8703	0.0233342		70	29.0859	0.00947185
																				71	18.7359	0.00420149		71	66.0953	0.00692978
																				72	20.0984	0.00311391		72	57.9562	0.00496272
																				73	29.9688	0.0130831		73	86.05	0.00708157
																				74	15.5359	0.151921		74	52.8141	0.00977649
																				75	29.6484	0.150348		75	74.4281	0.00540122
																				76	19.7031	0.0195915		76	84.9938	0.00733073
																				77	17.2094	0.0116423		77	72.8578	0.00628179
																				78	21.6828	0.0281832		78	50.5	0.0055601
																				79	30.6844	0.0309454		79	95.0375	0.00742721
																				80	33.3625	0.0457291		80	27.8547	0.00502567
																				81	25.9047	0.0225662		81	96.7203	0.00585536
																				82	19.8625	0.0138144		82	40.7828	0.00201154
																				83	33.8047	0.0260584		83	80.2203	0.00558936
																				84	19.5641	0.0532904		84	88.3797	0.0077949
																				85	23.1609	0.00866106		85	76.5594	0.00545143
																				86	16.6234	0.0350896		86	76.4437	0.00667108
																				87	17.2484	0.0114268		87	44.9484	0.00757514
																				88	19.4969	0.0181926		88	50.3953	0.00630407
																				89	22.3031	0.174749		89	76.4297	0.00460637
																				90	23.2781	0.0143886		90	96.5281	0.00705938
																				91	88.3375	0.0251811		91	67.1078	0.00934187
																				92	34.2953	0.0254907		92	79.1484	0.00622404
																				93	31.7609	0.0276648		93	70.725	0.00704655
																				94	22.5984	0.0339624		94	81.7672	0.00684962
																				95	22.0266	0.0131152		95	76.1266	0.00548246
																				96	16.8562	0.0403434		96	107.091	0.0116701
																				97	23.0094	0.0155344		97	92.7734	0.00705475
																				98	21.3672	0.0233425		98	21.4812	0.0335915
																				99	37.3953	0.047355		99	78.6172	0.005852
																				100	14.5125	0.00518972		100	65.5187	0.00634609
																				101	27.7781	0.053566		101	30.6531	0.00947504
																				102	16.1953	0.0326667		102	85.8141	0.00879718
																				103	16.2844	0.156827		103	15.8672	0.0336476
																				104	28.6797	0.0349041		104	14.8984	0.0217461
																				105	17.7203	0.0906089		105	82.7844	0.00779748
																				106	17.9297	0.0150323		106	72.1969	0.00518865
																				107	128.269	0.0274762		107	69.5234	0.00561198
																				108	17.7375	0.00191192		108	56.9766	0.00636594
																				109	24.5063	0.0216094		109	63.6625	0.0100931
																				110	16.9109	0.00330357		110	14.1172	0.011465
																				111	19.9109	0.00715125		111	13.7766	0.00133434
																				112	14.2047	0.00967483		112	63.1359	0.0090152
																				113	23.1781	0.0247526		113	14.4922	0.00150509
																				114	22.7844	0.0377751		114	90.7062	0.0078275
																				115	99.0062	0.0208483		115	97.0609	0.00602481
																				116	31.7219	0.0199929		116	83.0484	0.00709223
																				117	41.6891	0.0542163		117	28.3813	0.00332995
																				118	17.8266	0.0534821		118	85.5312	0.00699783
																				119	29.3453	0.0231712		119	77.2609	0.00717775
																				120	83.4047	0.156232		120	30.7563	0.00524192
																				121	31.4844	0.0379234		121	46.4359	0.00353667
																				122	14.9359	0.0201215		122	35.6672	0.00562942
																				123	11.0125	0.00488199		123	21.8453	0.0117664
																				124	24.0734	0.0446203		124	82.7422	0.00603546
																				125	99.8828	0.0237751		125	51.0438	0.00382384
																				126	18.2906	0.0351136		126	77.0516	0.00767515
																				127	45.6422	0.0122756		127	13.5906	0.00455041
																				128	21.1422	0.0448475		128	80.5594	0.0076659
																				129	30.55	0.0208033		129	29.1078	0.0045241
																				130	16.1062	0.0236402		130	21.2859	0.000818465
																				131	22.2063	0.0730542		131	52.5828	0.0043774
																				132	20.3141	0.0194851		132	16.3938	0.0100392
																				133	17.0609	0.0171618		133	59.9578	0.00750197
																				134	17.3781	0.00782001		134	71.7234	0.00981863
																				135	117.881	0.0302896		135	26.7766	0.00577992
																				136	43.175	0.00395585		136	68.4562	0.00699067
																				137	23.4312	0.0289217		137	69.9359	0.00873989
																				138	42.5391	0.0172467		138	40.9094	0.00578137
																				139	25.3406	0.0165924		139	57.9219	0.00716018
																				140	13.1781	0.0269877		140	78.2062	0.007261
																				141	55.65	0.0166967		141	24.1328	0.0109687
																				142	30.4937	0.0229739		142	62.2219	0.00729737
																				143	14.6031	0.0196635		143	91.9297	0.00890233
																				144	15.9406	0.0222894		144	71.5672	0.00599056
																				145	25.0094	0.0212327		145	39.6359	0.00446164
																				146	36.2625	0.0147772		146	41.1656	0.0106488
																				147	15.3953	0.0140373		147	61.1891	0.00842397
																				148	59.6297	0.029865		148	95.3656	0.00943774
																				149	27.3484	0.0152849		149	45.0422	0.0052007
																				150	26.1906	0.0140359		150	91.9969	0.00685743
																				151	53.1984	0.0155192		151	82.4813	0.00656991
																				152	20.7375	0.0279355
																				153	15.3641	0.0120209
																				154	36.4344	0.0202756
																				155	14.8187	0.024039
																				156	66.0922	0.0289364
																				157	57.7125	0.0128112
																				158	23.9844	0.0154178
																				159	19.9016	0.0323246
																				160	13.3891	0.0057643
																				161	16.4906	0.020337
																				162	16.9297	0.140081
																				163	15.3969	0.00512001
																				164	33.9875	0.0261438
																				165	47.9641	0.0351692
																				166	20.4828	0.026645
																				167	31.2359	0.00897758
																				168	30.6047	0.00913935
																				169	97.4031	0.0204304
																				170	107.258	0.024514
																				171	23.3766	0.00480236
																				172	23.7437	0.0416945
																				173	37.8156	0.00650151
																				174	30.2734	0.00850273
																				175	52.2828	0.0293491
																				176	20.1656	0.0272553
																				177	21.2141	0.0243481
																				178	24.3656	0.0592774
																				179	27.7047	0.0142232
																				180	11.7594	0.0162273
																				181	19.7391	0.0366519
																				182	49.4688	0.0151722
																				183	47.0266	0.0186488
																				184	17.1109	0.014526
																				185	24.4141	0.00817429
																				186	22.1	0.0188147
																				187	31.6406	0.0121623
																				188	14.9719	0.00497739
																				189	19.2953	0.00747249
																				190	17.9625	0.0244228
																				191	16.8281	0.0183967
																				192	16.1391	0.0289572
																				193	32.6469	0.0669352
																				194	105.564	0.0321332
																				195	20.3859	0.0393658
																				196	42.8594	0.0170682
																				197	23.9031	0.0318173
																				198	13.3812	0.00534796
																				199	83.7672	0.0173849
																				200	16.325	0.0372016
																				201	18.175	0.0232033
																				202	39.4813	0.0189134
																				203	23.6797	0.0414882
																				204	99.8141	0.0220767
																				205	21.425	0.00502425
																				206	25.5141	0.0295881
																				207	28.9734	0.045048
																				208	16.9047	0.0323266
																				209	31.4219	0.0195632
																				210	15.9375	0.00219381
																				211	90.7219	0.0254476
																				212	29.475	0.0566743
																				213	30.8234	0.0142387
																				214	26.7563	0.0352639
																				215	26.1516	0.035329
																				216	15.4313	0.0543252
																				217	13.1359	0.0350019
																				218	16.1406	0.0257069
																				219	98.9234	0.0283407
																				220	34.3937	0.0144545
																				221	19.8062	0.0469533
																				222	28.8172	0.0532458
																				223	116.958	0.0225263
																				224	47.8656	0.00817788
																				225	27.5766	0.0802553
																				226	34.5516	0.0126344
																				227	11.8625	0.0234187
																				228	12.0516	0.0192864
																				229	25.1953	0.0137505
																				230	14.2203	0.0262013
																				231	18.2219	0.027863
																				232	20.7469	0.00391026
																				233	80.4906	0.0290913
																				234	25.1125	0.0301287
																				235	20.8375	0.0248615
																				236	13.8531	0.0401515
																				237	19.15	0.0571416
																				238	40.5969	0.0215475
																				239	30.4922	0.00516305
																				240	22.6375	0.0189169
																				241	58.1609	0.0263961
																				242	71.175	0.0406806
																				243	24.1125	0.00526947
																				244	21.4969	0.0294848
																				245	104.306	0.0233387
																				246	90.0578	0.0271167
																				247	13.5859	0.0308756
																				248	15.4547	0.0331366
																				249	14.5859	0.151853
																				250	55.3391	0.0226235
																				251	19.3828	0.0463366
																				252	16.4	0.047393
																				253	13.3297	0.0216904
																				254	49.6953	0.027814
																				255	52.1141	0.0104525
																				256	14.9219	0.0197849
																				257	26.6016	0.0290229
																				258	18.1984	0.0427604
																				259	24.8766	0.0363839
																				260	21.4234	0.0330433
																				261	21.8313	0.0231771
																				262	11.4406	0.0105051
																				263	11.3938	0.00799947
																				264	25.5406	0.0142306
																				265	19.0594	0.0215288
																				266	17.4062	0.0446745
																				267	30.2797	0.0257579
																				268	23.7437	0.0294013
																				269	17.5969	0.0140169
																				270	27.4719	0.0222903
																				271	12.6359	0.0815769
																				272	15.9219	0.00600251
																				273	22.1016	0.0217925
																				274	20.525	0.01754
																				275	52.1391	0.0320584
																				276	96.0125	0.0164491
																				277	98.5766	0.0239853
																				278	29.3062	0.0106401
																				279	10.8656	0.0163286
																				280	24.9	0.0651867
																				281	28.7047	0.0503379
																				282	30.1562	0.0469517
																				283	17.2359	0.0255002
																				284	33.4562	0.0116469
																				285	17.7734	0.0285781
																				286	17.6453	0.0350167
																				287	89.5438	0.0368046
																				288	27.9625	0.0476455
																				289	34.075	0.0136631
																				290	26.7141	0.057379
																				291	36.3078	0.0314013
																				292	17.8516	0.0261176
																				293	23.9375	0.02941
																				294	16.7484	0.0467748
																				295	22.8281	0.0244479
																				296	57.3094	0.0580295
																				297	24.3766	0.0253841
																				298	24.5172	0.0152814
																				299	33.0219	0.0141767
																				300	23.8516	0.0155217
																				301	15.775	0.0066121
																				302	18.8922	0.121964
																				303	25.2625	0.0162573
																				304	93.3234	0.0235276
																				305	42.5562	0.0185671
																				306	29.7594	0.0133728
																				307	19.8422	0.0229867
																				308	21.4984	0.0124215
																				309	16.5516	0.0334956
																				310	22.6344	0.0348721
																				311	19.7563	0.0505253
																				312	15.0922	0.0363151
																				313	15.7984	0.0218282
																				314	72.1781	0.0298932
																				315	26.9797	0.0218818
																				316	21.2	0.0344187
																				317	18.0219	0.02966
																				318	19.65	0.0200411
																				319	23.0266	0.0256274
																				320	100.194	0.0291139
																				321	20.6219	0.0601468
																				322	14.4344	0.0183587
																				323	54.0516	0.0262647
																				324	41.3781	0.0361674
																				325	15.0469	0.0175261
																				326	15.8016	0.0316639
																				327	23.9547	0.0354062
																				328	23.4906	0.0250362
																				329	28.6406	0.0229329
																				330	48.4141	0.0208638
																				331	11.3531	0.00576608
																				332	15.5406	0.0532816
																				333	12.9016	0.00423418
																				334	19.0813	0.0659169
																				335	30.6156	0.0620772
																				336	14.0547	0.00910903
																				337	81.0969	0.0315536
																				338	17.4312	0.0196455
																				339	24.6766	0.0215534
																				340	28.0078	0.0583931
																				341	14.9984	0.0309338
																				342	26.7844	0.0402944
																				343	21.3391	0.0187754
																				344	15.5328	0.0228136
																				345	11.8734	0.0202763
																				346	13.2063	0.020886
																				347	22.4312	0.0243667
																				348	11.3859	0.0352351
																				349	13.5266	0.0054221
																				350	18.9625	0.0153543
																				351	30.8172	0.0328736
																				352	24.8266	0.020778
																				353	28.3297	0.0175104
																				354	14.6312	0.0181882
																				355	23.9344	0.00965619
																				356	22.4	0.0228255
																				357	49.3391	0.0288256
																				358	22.7984	0.0418109
																				359	14.1516	0.0136244
																				360	20.0312	0.00799214
																				361	16.7328	0.0564995
																				362	15.4375	0.0152372
																				363	13.9328	0.0145369
																				364	18.4641	0.0323998
																				365	17.4422	0.0519923
																				366	17.6547	0.0302211
																				367	38.7828	0.0144955
																				368	15.9516	0.00360193
																				369	84.2453	0.0270968
																				370	11.3562	0.00661524
																				371	15.5828	0.0107516
																				372	37.7844	0.0256615
																				373	17.3766	0.0468193
																				374	45.3813	0.0270404
																				375	21.6625	0.0357667
																				376	26.375	0.0246646
																				377	115.209	0.0231871
																				378	33.7906	0.0254684
																				379	13.2594	0.00846254
																				380	25.1078	0.0211591
																				381	16.0531	0.0426913
																				382	106.792	0.0229779
																				383	29.5766	0.0442831
																				384	15.8297	0.0259101
																				385	13.0156	0.00971338
																				386	33.0719	0.0326012
																				387	22.9797	0.0329294
																				388	14.3891	0.0124767
																				389	13.4641	0.0432057
																				390	29.3313	0.044484
																				391	86.3719	0.0329646
																				392	14.9594	0.0716068
																				393	12.8703	0.0753946
																				394	36.9672	0.0208541
																				395	31.3984	0.0335475
																				396	19.2609	0.0232505
																				397	18.2688	0.0315805
																				398	23.0578	0.0163986
																				399	26.5266	0.0655505
																				400	51.2484	0.0153229
																				401	16.7984	0.0128098
																				402	23.1891	0.0112614
																				403	41.9359	0.0148883
																				404	13.1453	0.00926473
																				405	18.6359	0.0254303
																				406	19.8281	0.0249643
																				407	25.1375	0.0225244
																				408	14.3688	0.0283075
																				409	30.6719	0.0484306
																				410	23.1438	0.00860259
																				411	19.8438	0.0280452
																				412	9.75781	0.0101856
																				413	14.925	0.0592178
																				414	14.1062	0.0212979
																				415	45.1203	0.0342158
																				416	11.8187	0.0142817
																				417	29.7984	0.017154
																				418	25.5375	0.0215346
																				419	18.5703	0.0312037
																				420	14.5266	0.0242413
																				421	31.4406	0.0349459
																				422	45.4984	0.0227545
																				423	36.1234	0.0229908
																				424	18.4016	0.0334386
																				425	13.0203	0.022238
																				426	18.5906	0.0195038
																				427	22.0656	0.0297722
																				428	52.7219	0.00819154
																				429	16.5109	0.0382067
																				430	23.15	0.026083
																				431	18.9797	0.059896
																				432	20.2375	0.0151744
																				433	86.8641	0.0373186
																				434	16.1922	0.0181715
																				435	15.3297	0.00994314
																				436	17.3281	0.0445643
																				437	24.5219	0.0199594
																				438	13.5437	0.138532
																				439	31.1203	0.0141826
																				440	11.7625	0.00402512
																				441	61.075	0.025153
																				442	39.3	0.00771659
																				443	14.5563	0.0664477
																				444	15.4187	0.0289486
																				445	16.8531	0.0326499
																				446	41.7078	0.0245928
																				447	13.8344	0.0216588
																				448	69.8453	0.0370599
																				449	14.4969	0.0186339
																				450	25.2828	0.0267922
																				451	22.4	0.0347934
																				452	22.1313	0.0373126
																				453	28.1891	0.0207533
																				454	19.1234	0.0444075
																				455	31.8266	0.0231097
																				456	48.15	0.0198968
																				457	84.8297	0.0220128
																				458	15.2531	0.0222525
																				459	30.3969	0.120501
																				460	17.6578	0.0485121
																				461	18.4438	0.00616619
																				462	25.9016	0.0319203
																				463	34.9969	0.0350748
																				464	25.9656	0.00906295
																				465	42.6906	0.0214051
																				466	18.1187	0.0231088
																				467	19.7469	0.0508281
																				468	51.1078	0.0343034
																				469	16.3938	0.0332038
																				470	46.6406	0.0368569
																				471	136.348	0.014985
																				472	14.7594	0.0103107
																				473	135.106	0.0224322
																				474	21.5375	0.0299376
																				475	15.8844	0.0327826
																				476	30.7563	0.0233795
																				477	36.5328	0.0231464
																				478	23.4094	0.00981744
																				479	25.6	0.156094
																				480	26.7063	0.0327066
																				481	117.822	0.00331507
																				482	14.25	0.0371454
																				483	18.7688	0.0429669
																				484	20.2312	0.010833
																				485	35.6344	0.0375961
																				486	63.6266	0.0282445
																				487	16.8375	0.062267
																				488	94.8578	0.0251018
																				489	21.6281	0.0204506
																				490	50.1719	0.0519818
																				491	15.2469	0.023055
																				492	15.3688	0.0196826
																				493	15.025	0.0171772
																				494	83.9578	0.0280039
																				495	41.5281	0.0225061
																				496	13.5844	0.0296853
																				497	14.7203	0.0140698
																				498	13.4766	0.0106563
																				499	24.6641	0.0310337
																				500	19	0.0325957
																				501	16.5797	0.102624
																				502	19.3969	0.0101606
																				503	58.6016	0.0257628
																				504	35.2547	0.0306943
																				505	86.8031	0.0590863
																				506	19.9781	0.0638765
																				507	19.3766	0.0299196
																				508	19.9172	0.0171533
																				509	16.3953	0.0169611
																				510	18.0094	0.0357777
																				511	49.0312	0.0324887
																				512	15.6234	0.0408206
																				513	68.8531	0.0302083
																				514	17.8391	0.0560917
																				515	15.9	0.0333193
																				516	17.1609	0.039531
																				517	27.4594	0.0328257
																				518	74.3641	0.0358314
																				519	18.6281	0.014459
																				520	21.7422	0.161611
																				521	20.1891	0.0191081
																				522	13.1	0.0224092
																				523	16.9766	0.0152189
																				524	126.855	0.0220846
																				525	20.8969	0.0352493
																				526	16.5609	0.0328356
																				527	16.7063	0.0153112
																				528	34.0953	0.0289792
																				529	104.992	0.0233233
																				530	20.1844	0.0310461
																				531	16.8687	0.0200938
																				532	14.7859	0.0681667
																				533	16.8938	0.00773826
																				534	20.6766	0.0349465
																				535	11.3453	0.00415863
																				536	16.3922	0.0273222
																				537	23.05	0.0211886
																				538	14.5938	0.0259113
																				539	22.0953	0.0273145
																				540	22.4234	0.022741
																				541	84.6891	0.0233094
																				542	46.2016	0.0308636
																				543	88.1781	0.0231972
																				544	21.1031	0.0300022
																				545	21.9484	0.0276669
																				546	12.9156	0.0442283
																				547	13.6203	0.0239603
																				548	21.6187	0.0221735
																				549	55.5656	0.00927045
																				550	18.6219	0.0282157
																				551	44.8781	0.0212961
																				552	55.3344	0.0222216
																				553	30.0078	0.038544
																				554	63.2969	0.0178738
																				555	17.7375	0.0182906
																				556	87.5609	0.0375478
																				557	13.3047	0.00453673
																				558	54.2625	0.0201188
																				559	25.6969	0.024072
																				560	14.3562	0.0404664
																				561	29.2078	0.0599573
																				562	13.6578	0.0256331
																				563	141.764	0.0315947
																				564	127.627	0.0218322
																				565	170.055	0.0145267
																				566	12.5859	0.0192012
																				567	16.7359	0.0617888
																				568	37.3953	0.122573
																				569	38.4359	0.0388468
																				570	58.0922	0.018753
																				571	20.3516	0.0266883
																				572	12.8	0.00424785
																				573	16.175	0.00446956
																				574	19.7484	0.0229826
																				575	11.9156	0.0512797
																				576	16.7188	0.0577316
																				577	20.9078	0.100017
																				578	20.7484	0.0129826
																				579	92.8328	0.0290301
																				580	27.3406	0.0553269
																				581	22.8734	0.0443343
																				582	16.7922	0.0197477
																				583	21.1562	0.0186283
																				584	19.8234	0.120736
																				585	27.0781	0.0269358
																				586	32.7484	0.0426799
																				587	15.4594	0.00743044
																				588	98.7828	0.165848
																				589	99.3531	0.0666258
																				590	56.1078	0.017242
																				591	16.8062	0.0491294
																				592	15.4156	0.0108102
																				593	28.6016	0.0387213
																				594	45.3453	0.0462327
																				595	17.0703	0.0385786
																				596	25.3203	0.0225873
																				597	24.675	0.0377007
																				598	12.7828	0.0145978
																				599	21.3516	0.0432541
																				600	34.4078	0.0683565
																				601	18.5437	0.0157179
																				602	13.5	0.00423845
																				603	21.6297	0.0590731
																				604	17.6547	0.0699273
																				605	81.4437	0.0440348
																				606	18.0594	0.0246773
																				607	20.3891	0.0506545
																				608	110.07	0.0254449
																				609	20.4563	0.026283
																				610	16.7703	0.0327723
																				611	37.5969	0.0244352
																				612	18.075	0.0326116
																				613	15.9391	0.0341709
																				614	24.7812	0.0305174
																				615	12.4453	0.0422974
																				616	96.0125	0.0246525
																				617	21.8188	0.0475951
																				618	37.4172	0.0263172
																				619	13.3234	0.0166038
																				620	23.1578	0.0190415
																				621	24.5734	0.0280424
																				622	37.8453	0.0262257
																				623	14.6203	0.065774
																				624	14.6766	0.0203747
																				625	29.4469	0.0183595
																				626	28.3109	0.0252123
																				627	16.5344	0.0334421
																				628	14.4234	0.063272
																				629	23.0281	0.0274335
																				630	17.9656	0.02184
																				631	12.2531	0.040488
																				632	22.6109	0.0307191
																				633	15.7422	0.049368
																				634	15.0547	0.00669136
																				635	15.3422	0.00388174
																				636	15.1188	0.0319903
																				637	57.9406	0.0292481
																				638	72.4781	0.0109369
																				639	102.372	0.019817
																				640	16.4547	0.0354002
																				641	15.3094	0.00608201
																				642	37.525	0.0592323
																				643	14.5797	0.00220255
																				644	15.7719	0.0560505
																				645	17.0688	0.0236193
																				646	99.8516	0.0242515
																				647	17.2969	0.0151262
																				648	91.4266	0.0211631
																				649	23.4047	0.00673815
																				650	18.4766	0.0593733
																				651	17.4937	0.0154948
																				652	12.9109	0.0216043
																				653	18.1375	0.0649389
																				654	20.1625	0.00789766
																				655	29.9359	0.0487434
																				656	20.1641	0.0235592
																				657	14.0953	0.00533379
																				658	134.38	0.0203444
																				659	63.8	0.0128296
																				660	18.6172	0.0314174
																				661	26.1938	0.049275
																				662	21.275	0.0342967
																				663	18.7781	0.0293574
																				664	78.4266	0.0239789
																				665	20.7219	0.0226252
																				666	15.1438	0.0691235
																				667	14.1203	0.0199923
																				668	14.85	0.0313936
																				669	97.2844	0.0218568
																				670	18.1219	0.0592851
																				671	24.7734	0.0267496
																				672	15.9375	0.0423237
																				673	17.7688	0.0232218
																				674	17.6078	0.0214496
																				675	13.8984	0.00778155
																				676	13.8703	0.0313027
																				677	13.3141	0.0312315
																				678	91.0156	0.0297616
																				679	17.5297	0.0335037
																				680	79.4984	0.0229714
																				681	17.475	0.0201581
																				682	110.333	0.0237678
																				683	16.6109	0.0438155
																				684	16.2672	0.0126411
																				685	95.7734	0.0240709
																				686	23.0562	0.0294811
																				687	19.8875	0.0498111
																				688	14.9187	0.0131542
																				689	10.9297	0.0102875
																				690	15.9031	0.0246186
																				691	84.7172	0.0351847
																				692	22.4781	0.0254047
																				693	13.2953	0.0181961
																				694	19.3828	0.0465248
																				695	34.4016	0.0277085
																				696	12.9969	0.00753483
																				697	10.3844	0.0324959
																				698	29.0328	0.0170838
																				699	104.778	0.0174371
																				700	132.664	0.0241601
																				701	114.481	0.0199742
																				702	91.0781	0.032282
																				703	32.6203	0.018011
																				704	37.2109	0.0517315
																				705	81.0719	0.032918
																				706	16.9922	0.0234236
																				707	17.4875	0.0346874
																				708	13.5891	0.0181001
																				709	16.5656	0.0151994
																				710	13.9938	0.019132
																				711	42.8531	0.025296
																				712	17.8734	0.0345441
																				713	58.7047	0.0437386
																				714	62.9375	0.0320065
																				715	35.0281	0.0246275
																				716	111.742	0.0185758
																				717	16.4141	0.0289317
																				718	19.5156	0.0289567
																				719	13.5125	0.0203587
																				720	15.1297	0.0100223
																				721	23.4594	0.0213658
																				722	35.2859	0.0195454
																				723	17.4234	0.0213096
																				724	103.397	0.0181479
																				725	9.77656	0.0112808
																				726	47.7781	0.0252045
																				727	10.6562	0.0131078
																				728	16.475	0.016044
																				729	24.7875	0.0422919
																				730	19.2531	0.0306594
																				731	62.5125	0.024945
																				732	23.0391	0.0249607
																				733	100.503	0.0220104
																				734	13.6687	0.0230126
																				735	15.4641	0.0324394
																				736	63.0922	0.0209537
																				737	24.0234	0.0277853
																				738	11.5188	0.0162435
																				739	70.3953	0.0201572
																				740	17.7766	0.113714
																				741	100.098	0.0301912
																				742	19.6953	0.0327946
																				743	58.6453	0.0216936
																				744	22.5672	0.0349875
																				745	19.7328	0.0243189
																				746	20.4484	0.0150954
																				747	17.0891	0.0510659
																				748	28.3219	0.0423598
																				749	35.35	0.0185172
																				750	16.5063	0.0318315
																				751	37.8391	0.0235581
																				752	35.8703	0.0333998
																				753	15.3063	0.00593473
																				754	15.8469	0.0134898
																				755	38.6594	0.0230979
																				756	34.3875	0.0220635
																				757	12.6937	0.00837642
																				758	48.0844	0.0269937
																				759	15.6766	0.191261
																				760	16.6812	0.0133733
																				761	97.6547	0.0187985
																				762	112.972	0.0171525
																				763	20.3344	0.0227697
																				764	94.9797	0.0215447
																				765	14.9531	0.0146434
																				766	67.4078	0.0282367
																				767	41.5031	0.0224465
																				768	30.5094	0.0422159
																				769	13.0141	0.0130566
																				770	15.6438	0.0274903
																				771	12.9219	0.00709926
																				772	26.4859	0.00524837
																				773	12.8781	0.0558515
																				774	17.6687	0.0180957
																				775	25.4578	0.0484894
																				776	93.5812	0.0157092
																				777	15.9594	0.00938933
																				778	13.1	0.00180437
																				779	18.6797	0.0385663
																				780	13.05	0.0221026
																				781	58.1891	0.0299462
																				782	17.3578	0.029143
																				783	17.2016	0.0287508
																				784	33.0938	0.0167061
																				785	19.1187	0.0355515
																				786	33.6969	0.0326714
																				787	11.5094	0.0192757
																				788	20.8813	0.0278321
																				789	104.291	0.0189026
																				790	17.1438	0.0207733
																				791	18.4344	0.0285464
																				792	29.0437	0.0538452
																				793	14.7188	0.0235541
																				794	44.8141	0.0429552
																				795	27.1625	0.0672833
																				796	29.7906	0.0248928
																				797	18.5281	0.0221003
																				798	16.4172	0.0293453
																				799	10.4531	0.152309
																				800	21.3203	0.00964952
																				801	14.4469	0.0218265
																				802	39.0859	0.0277659
																				803	11.0734	0.0853491
																				804	17.7859	0.0463139
																				805	32.3047	0.0573755
																				806	52.5797	0.0352682
																				807	18.8313	0.0378195
																				808	13.2359	0.0414696
																				809	18.6687	0.00348028
																				810	76.9406	0.0195111
																				811	18.3219	0.0452097
																				812	16.05	0.0416724
																				813	61.6109	0.0286199
																				814	34.3219	0.034118
																				815	21.8141	0.0332603
																				816	20.1516	0.0520117
																				817	17.5859	0.0116811
																				818	13.0391	0.0125122
																				819	50.3703	0.0724221
																				820	18.1656	0.0423058
																				821	25.8906	0.0162019
																				822	90.8312	0.0216066
																				823	16.6172	0.0653487
																				824	27.4062	0.0330413
																				825	14.3797	0.012907
																				826	15.8469	0.0134898
																				827	38.6594	0.0230979
																				828	34.3875	0.0220635
																				829	12.6937	0.00837642
																				830	48.0844	0.0269937
																					15.6766	0.191261
																					16.6812	0.0133733
																					97.6547	0.0187985
																					112.972	0.0171525
																					20.3344	0.0227697
																					94.9797	0.0215447
																					14.9531	0.0146434
																					67.4078	0.0282367
																					41.5031	0.0224465
																					30.5094	0.0422159
																					13.0141	0.0130566
																					11.1578
																					15.6438	0.0274903
																					12.9219	0.00709926
																					26.4859	0.00524837
																					12.8781	0.0558515
																					17.6687	0.0180957
																					25.4578	0.0484894
																					93.5812	0.0157092
																					15.9594	0.00938933
																					13.1	0.00180437
																					18.6797	0.0385663
																					13.05	0.0221026
																					58.1891	0.0299462
																					17.3578	0.029143
																					17.2016	0.0287508
																					33.0938	0.0167061
																					83.1656
																					19.1187	0.0355515
																					33.6969	0.0326714
																					11.5094	0.0192757
																					20.8813	0.0278321
																					104.291	0.0189026
																					17.1438	0.0207733
																					18.4344	0.0285464
																					29.0437	0.0538452
																					14.7188	0.0235541
																					44.8141	0.0429552
																					27.1625	0.0672833
																					29.7906	0.0248928
																					14.5516
																					18.5281	0.0221003
																					16.4172	0.0293453
																					10.4531	0.152309
																					12.5188
																					18.6641
																					21.3203	0.00964952
																					14.4469	0.0218265
																					39.0859	0.0277659
																					11.0734	0.0853491
																					17.7859	0.0463139
																					32.3047	0.0573755
																					9.27656
																					52.5797	0.0352682
																					7.31719
																					10.1891
																					18.8313	0.0378195
																					13.2359	0.0414696
																					18.6687	0.00348028
																					76.9406	0.0195111
																					18.3219	0.0452097
																					16.05	0.0416724
																					12.3641
																					61.6109	0.0286199
																					34.3219	0.034118
																					21.8141	0.0332603
																					19.8813
																					20.1516	0.0520117
																					17.5859	0.0116811
																					13.0391	0.0125122
																					50.3703	0.0724221
																					18.1656	0.0423058
																					25.8906	0.0162019
																					90.8312	0.0216066
																					16.6172	0.0653487
																					27.4062	0.0330413
																					14.3797	0.012907
