# Supplementary material for: Cerebellar and vestibular nuclear synapses in the inferior olive have distinct release kinetics and neurotransmitters
Source: eLife. 2020 Dec 1;9:e61672. doi: 10.7554/eLife.61672 (PMC7707816; doi:10.7554/eLife.61672)
Supplement: Figure 4—figure supplement 1—source data 1. [file elife-61672-fig4-figsupp1-data1.xlsx]

## Sheet: Figure 4 - Figure supplement 1
Figure 4 - Figure supplement 1E-F
	YFP+ bouton	R2Vgat-Syt1/2	(Co-localization between Vgat and YFP)				Syt1/2+ bouton	R2Vgat-YFP	(Co-localization between Vgat and Syt1/2)
	1	0.181566					1	0.00209811
	2	0.0149999					2	0.013598
	3	0.0207027					3	0.0498702
	4	0.0688694					4	0.00139579
	5	0.00826174					5	0.0596317
	6	0.00296916					6	0.194728
	7	0.052148					7	0.0461108
	8	0.118318					8	0.00143467
	9	0.0125792					9	0.0171562
	10	0.0539083					10	0.0198255
	11	0.0327717					11	0.000664113
	12	0.000382327					12	0.0749235
	13	0.141536					13	0.00379361
	14	0.000608927					14	0.00890723
	15	0.0103552					15	2.52502e-05
	16	0.0311508					16	0.0431364
	17	0.0820786					17	0.000608552
	18	0.0273679					18	0.00104409
	19	0.00198138					19	0.062162
	20	0.000205171					20	0.0128398
	21	0.00993406					21	0.001072
	22	0.0209337					22	0.0393358
	23	0.00809947					23	0.000189466
	24	0.11227					24	0.0200474
	25	0.0917478					25	0.0063607
	26	0.0282754					26	0.0164595
	27	0.0130737					27	0.0188307
	28	0.00267133					28	0.00577804
	29	0.00747968					29	0.0115969
	30	2.76154e-05					30	0.0667276
	31	0.0510801					31	0.000651706
	32	0.0173696					32	0.0360087
	33	0.00783851					33	0.0301838
	34	0.00108956					34	0.0297378
	35	0.0326836					35	0.000188639
	36	0.0520795					36	0.0122109
	37	0.0241067					37	0.11793
	38	0.0151145					38	0.013016
	39	0.000467011					39	0.00547005
	40	0.0505703					40	0.0133775
	41	0.0211018					41	0.00945679
	42	0.000160746					42	0.0198057
	43	0.000225957					43	0.0233172
	44	0.00261245					44	0.0199793
	45	0.106117					45	0.014667
	46	0.0140597					46	0.000606051
	47	0.0201574					47	0.0401015
	48	0.00893458					48	0.00489385
	49	0.0029727					49	0.00583291
	50	0.00223205					50	0.0097403
	51	0.00591357					51	4.34958e-05
	52	0.0265904					52	0.197298
	53	0.0135503					53	0.0277593
	54	0.0149987					54	0.0587556
	55	0.0136677					55	0.0244546
	56	0.0262716					56	0.0190298
	57	0.0413908					57	0.0143308
	58	0.150911					58	0.00611753
	59	0.0364801					59	0.012816
	60	0.0567801					60	0.0277918
	61	0.0834128					61	0.006513
	62	0.00785103					62	0.00012923
	63	0.00295473					63	2.66721e-05
	64	0.0332219					64	0.00931713
	65	0.000620423					65	0.000583244
	66	0.246521					66	0.0027748
	67	0.00120304					67	0.00273454
	68	0.082365					68	0.0103469
	69	9.60518e-05					69	3.60798e-06
	70	0.00654322					70	0.00464592
	71	0.0209369					71	0.019656
	72	0.0909117					72	0.0453315
	73	0.170318					73	0.000677779
	74	0.036438					74	0.0613249
	75	0.0120542					75	0.0109563
	76	0.0256294					76	0.000147985
	77	0.0186014					77	0.114769
	78	0.0224377					78	0.0392222
	79	0.0786073					79	0.0458621
	80	0.0180546					80	0.0112609
	81	0.0320486					81	0.0248928
	82	0.000161381					82	0.151179
	83	0.0159423					83	0.00867954
	84	0.149504					84	0.0276558
	85	0.0267429					85	0.00603602
	86	0.113222					86	0.00126248
	87	0.0382424					87	0.0212152
	88	0.0179595					88	0.0265391
	89	0.0409606					89	0.0319381
	90	0.0212968					90	0.0128234
	91	5.47189e-05					91	0.00531604
	92	0.000659644					92	0.00149887
	93	0.00068609					93	0.0323061
	94	0.000637345					94	0.000486841
	95	0.0231314					95	0.0019829
	96	0.0256191					96	3.59954e-05
	97	0.238852					97	0.0194971
	98	0.0903604					98	0.011767
	99	0.000569798					99	0.0037339
	100	0.0595811					100	0.0668616
	101	0.099993					101	0.0179164
	102	0.00902216					102	0.010533
	103	0.000226006					103	0.00469246
	104	0.00168868					104	0.121777
	105	0.0115876					105	0.00650437
	106	0.0353439					106	0.000432441
	107	0.10776					107	0.00208914
	108	0.00439024					108	0.00594345
	109	9.06893e-08					109	0.0187603
	110	0.0266648					110	0.00699565
	111	0.0176625					111	0.0454971
	112	0.122372					112	0.00565016
	113	0.00505518					113	0.0311988
	114	0.0149261					114	0.0443746
	115	0.00186371					115	0.00883538
	116	0.00128731					116	0.027454
	117	0.065664					117	0.045748
	118	0.00222617					118	0.0139664
	119	0.000855495					119	0.0860536
	120	0.00558447					120	0.0103071
	121	0.07525					121	0.0249946
	122	0.00177596					122	0.00131018
	123	0.00606161					123	0.012818
	124	0.218505					124	0.012422
	125	0.021769					125	0.000748688
	126	0.00223211					126	0.0605349
	127	0.0444443					127	0.00107181
	128	0.000387879					128	0.00368667
	129	0.000693498					129	0.089061
	130	0.0469069					130	0.00441075
	131	0.15231					131	0.0156936
	132	0.0318212					132	0.0377673
	133	0.0249994					133	0.0233211
	134	0.00184011					134	0.00382792
	135	0.00318368					135	0.0862693
	136	0.0497697					136	0.0278473
	137	0.126633					137	0.0485376
	138	0.0248632					138	0.0357691
	139	0.0477397					139	0.0311875
	140	0.00128753					140	0.000450172
	141	0.000283789					141	0.119662
	142	0.00097071					142	0.00194642
	143	0.000582744					143	0.00931472
	144	0.00260879					144	0.00626567
	145	0.0594841					145	0.216334
	146	0.0482532					146	0.0393096
	147	0.00699984					147	0.0312942
	148	0.00326158					148	0.0140699
	149	0.00581762					149	0.0044126
	150	0.0287175					150	0.533148
	151	0.0125809					151	0.0465321
	152	0.0182027					152	0.0314647
	153	0.00181471					153	0.00122389
	154	0.115131					154	0.0156536
	155	0.000248804					155	0.000914177
	156	0.00345767					156	0.000110683
	157	0.00170351					157	0.0280837
	158	0.0322206					158	0.00108985
	159	0.0778458					159	0.0243781
	160	0.107267					160	0.0135889
	161	0.0392149					161	0.0110628
	162	0.0293237					162	0.0304119
	163	0.0424609					163	0.0106268
	164	0.0239865					164	0.0154494
	165	0.000204174					165	0.00154944
	166	0.336313					166	0.0171734
	167	0.00934269					167	0.0341508
	168	0.0230025					168	0.24403
	169	0.0019546					169	0.0103587
	170	0.0418792					170	0.000567338
	171	0.0306794					171	0.00028596
	172	0.0871319					172	0.0439451
	173	0.0086448					173	0.00263867
	174	0.0399164					174	0.27588
	175	0.00208503					175	0.0818702
	176	0.0232809					176	0.00348632
	177	0.000132271					177	0.0322364
	178	0.163565					178	0.0769996
	179	0.0772147					179	0.097859
	180	0.00518865					180	0.103097
	181	0.0378613					181	8.27687e-05
	182	0.0381569					182	0.037401
	183	0.0604818					183	0.00226739
	184	0.0113861					184	0.00428332
	185	0.0016954					185	0.0088799
	186	0.0133149					186	0.00527868
	187	0.00463684					187	0.0451297
	188	0.0245888					188	0.137764
	189	0.180023					189	0.00540509
	190	0.00552731					190	0.039015
	191	0.0077631					191	0.00154093
	192	0.00204088					192	0.000518426
	193	0.00197277					193	0.0239508
	194	0.0176918					194	0.0171184
	195	0.0515237					195	0.0314151
	196	0.165673					196	0.0697597
	197	0.0347094					197	0.0860907
	198	0.0466873					198	0.0289243
	199	0.113295					199	0.019658
	200	0.088971					200	0.0276749
	201	3.40816e-06					201	9.37859e-06
	202	0.0243531					202	0.000334331
	203	6.37671e-05					203	0.0718669
	204	0.00409573					204	0.00887947
	205	0.0052677					205	0.0560714
	206	0.00519802					206	0.424186
	207	0.0160623					207	0.0330118
	208	0.00150897					208	0.06822
	209	0.022798					209	0.00213109
	210	0.0552684					210	0.00729979
	211	0.0305033					211	0.0247202
	212	0.0264658					212	0.000754822
	213	9.54355e-06					213	0.0160125
	214	0.00250852					214	0.00015416
	215	0.024307					215	0.0342414
	216	0.0979403					216	0.0479559
	217	0.02103					217	0.0247669
	218	0.107916					218	0.0376002
	219	0.567974					219	0.0412588
	220	0.0131261					220	0.000995014
	221	0.0404592					221	0.0433505
	222	0.0596654					222	0.00418959
	223	0.0289181					223	0.00104942
	224	0.0151298					224	0.00333856
	225	0.0281482					225	0.00020122
	226	0.0601299					226	0.000825411
	227	0.0292117					227	0.115203
	228	0.0490912					228	0.0354476
	229	0.0477756					229	0.0236754
	230	0.0235986					230	0.022089
	231	0.194905					231	0.00553889
	232	0.0573818					232	0.0313406
	233	0.0079975					233	0.0177669
	234	0.0148126					234	0.000149478
	235	0.00738887					235	0.0146676
	236	0.0750162					236	0.00155881
	237	0.0262753					237	0.0675919
	238	0.00308844					238	0.000327571
	239	0.0152289					239	0.0428123
	240	0.00713618					240	2.44189e-06
	241	0.0202544					241	0.0304218
	242	0.0245948					242	0.000512941
	243	0.0112832					243	0.127025
	244	0.037981					244	0.00391276
	245	0.0318731					245	0.00379438
	246	0.0538107					246	0.00151259
	247	0.0459736					247	0.0266898
	248	8.09798e-07					248	0.26998
	249	0.024793					249	0.00429233
	250	0.128522					250	0.0299554
	251	0.0107511					251	0.000216203
	252	0.116468					252	0.0578115
	253	0.0561675					253	0.0544954
	254	0.00389345					254	0.00350359
	255	0.00149096					255	0.000782768
	256	0.092971					256	0.00338026
	257	0.0342491					257	0.0129747
	258	0.0697733					258	0.0158263
	259	0.0602581					259	0.00810142
	260	0.00342032					260	0.0500733
	261	0.0183909					261	0.00172059
	262	0.0146817					262	0.0337301
	263	0.0551894					263	0.0199114
	264	0.0125452					264	0.0141007
	265	0.114925					265	0.270335
	266	0.0201646					266	0.231776
	267	0.00979399					267	0.009844
	268	0.0134534					268	0.00254537
	269	0.0176838					269	0.0269341
	270	0.0591945					270	0.0261797
	271	0.0329934					271	0.00383011
	272	0.185549					272	0.0816397
	273	0.00251539					273	0.0307489
	274	0.0277627					274	0.123477
	275	0.0122186					275	0.00239661
	276	0.144624					276	0.329209
	277	0.0817218					277	0.0898016
	278	0.0566267					278	0.00813796
	279	2.6788e-05					279	0.0140609
	280	0.0327725					280	0.0104938
	281	0.0193132					281	0.0112811
	282	0.00360275					282	0.00195726
	283	0.0103635					283	0.136591
	284	0.0670246					284	0.0630375
	285	0.00126523					285	0.133362
	286	0.000354424					286	0.00421882
	287	5.31183e-05					287	0.0316035
	288	0.0325357					288	0.133963
	289	0.0213981					289	0.147045
	290	0.113789					290	0.00454692
	291	0.0510947					291	0.00164425
	292	0.0247702					292	0.0910318
	293	0.0335815					293	0.00273425
	294	0.013828					294	0.00201742
	295	0.00134488					295	0.0338591
	296	0.0333395					296	0.0272263
	297	0.0416444					297	0.124629
	298	0.0385938					298	0.0190888
	299	0.00308622					299	0.00931556
	300	0.000333157					300	0.0614638
	301	0.0130359					301	0.164011
	302	0.00305801					302	0.0342165
	303	0.206498					303	0.00478013
	304	0.000477166					304	0.0120722
	305	0.00530566					305	0.000438162
	306	0.00227891					306	0.0542501
	307	0.53749					307	9.72982e-05
	308	0.0607677					308	0.0178242
	309	0.00100525					309	0.0282928
	310	0.0507802					310	0.0126404
	311	0.0317717					311	0.000279735
	312	0.0297173					312	3.19242e-05
	313	0.00150492					313	0.0148447
	314	0.0132703					314	0.00265741
	315	0.0190595					315	0.0783009
	316	0.00517874					316	0.0163564
	317	0.0548308					317	0.0056215
	318	0.0214874					318	0.0279674
	319	0.0777472					319	0.00812489
	320	0.1176					320	0.0888864
	321	0.0857479					321	0.0084715
	322	0.0667394					322	0.00170021
	323	0.00018175					323	0.0346942
	324	0.00970842					324	0.00312671
	325	0.00355676					325	0.00222901
	326	0.0985138					326	0.000166402
	327	0.00245173					327	0.0395482
	328	0.063451					328	3.48226e-05
	329	0.0239971					329	0.0568373
	330	0.0142626					330	0.00135719
	331	0.00631228					331	0.0213534
	332	0.0140996					332	0.000980568
	333	0.0230856					333	0.00183416
	334	0.0400343					334	0.0665495
	335	0.0480601					335	0.00381794
	336	0.150614					336	0.138049
	337	0.0954251					337	0.0140539
	338	7.9131e-05					338	4.88698e-05
	339	0.0635559					339	0.00968881
	340	0.0564467					340	0.0361855
	341	0.0705196					341	0.00295089
	342	0.0493151					342	0.00308825
	343	0.0429281					343	0.0130429
	344	0.0089566					344	0.000161515
	345	0.124145					345	0.00144475
	346	4.53849e-05
	347	0.0421431
	348	0.282059
	349	0.00076408
	350	0.00270004
	351	0.128376
	352	0.00906675
	353	0.000184671
	354	0.0016084
	355	0.0229558
	356	0.212208
	357	0.00014347
	358	0.00191165
	359	0.00733679
	360	0.0340014
	361	0.000375063
	362	0.0375594
	363	0.0325538
	364	0.0580756
	365	0.00317862
	366	0.0136158
	367	0.0178113
	368	0.0381166
	369	0.00768679
	370	0.0984416
	371	0.00304507
