# Supplementary material for: Cerebellar and vestibular nuclear synapses in the inferior olive have distinct release kinetics and neurotransmitters
Source: eLife. 2020 Dec 1;9:e61672. doi: 10.7554/eLife.61672 (PMC7707816; doi:10.7554/eLife.61672)
Supplement: Figure 4—source data 1. [file elife-61672-fig4-data1.xlsx]

## Sheet: Figure 4
Figure 4E-F
DCN-IO						VN-IO
Cell	subnucleus	rise (ms)	jitter (ms)	decay (ms)		Cell	subnucleus	rise (ms)	jitter (ms)	decay (ms)
1	PIO	19.9	25.1932	111.339		1	cDCK	0.00245	0.00181178	0.0316274
2	PIO	27.8	27.2483	86.1481		2	IOB/A	0.00375	0.00150237	0.0312601
3	PIO	16.2	21.0968	92.958		3	IOB/A	0.00445	0.00221566	0.0317704
4	PIO	20.7	27.1053	90.7018		4	DAO	0.00495	0.00175965	0.0406074
5	DAO	14.2	25.8148	90.6686		5	DAO	0.0025	0.001162	0.031696
6	DAO	25.15	29.5833	91.1916		6	rIOBe	0.00625	0.001162	0.0587021
7	rMAO	17.25	24.9538	55.9408		7	DAO	0.0047	0.00511033	0.0272344
8	DAO	27.95	20.9799	60.5975		8	rIOBe	0.0035	0.00265483	0.0579187
9	DAO	45.45	37.6085	45.6165		9	rIOBe	0.00565	0.00332518	0.0335028
10	PIO	16.9	27.4144	84.8372		10	cDCK	0.00305	0.00355896	0.028678
11	DAO	31.95	30.7523	56.8095		11	DAO	0.00225	0.00740396	0.0318636
12	DAO	14.55	25.6682	69.7951		12	IOBe/C	0.0037	0.0013305	0.0318996
13	PIO	34.1	34.2766	81.8138		13	IOB/A	0.00255	0.00144951	0.023557
14	DAO	20.4	32.3245	85.676		14	IOB/A	0.00385	0.00179145	0.0291929
15	PIO	19.25	28.2997	99.998		15	IOB/A	0.00505	0.00260939	0.0407504
16	PIO	13.85	24.2435	95.7024		16	IOB/A	0.00675	0.00147529	0.0234743
17	DAO	15.2	33.0418	98.0278		17	IOBe/C	0.0033	0.00117079	0.0250589
18	rMAO	14.6	27.2625	59.9244		18	rIOBe	0.0047	0.0018528	0.0334075
19	PIO	33.9	15.1216	89.3509		19	rIOBe	0.0055	0.0487897	0.181577
20	DAO	28.35	15.1145	100.018		20	rIOBe	0.0021	0.00369633	0.0431673
21	DAO	34.05	17.2975	88.2059		21	rIOBe	0.00505	0.00301198	0.075
22	DAO	29.35	14.7712	91.9913		22	DAO	0.00595	0.00406696	0.0599818
23	PIO	25.7	18.6993	109.504		23	DAO	0.0035	0.00198551	0.035291
24	rIOBe	10.15	11.3392	55.998		24	DAO	0.00205	0.00320678	0.0349826
25	DAO	31.5	15.3046	105.501		25	DAO	0.00435	0.0042391	0.051
26	DAO	16.55	44.8739	136.078		26	DAO	0.0016	0.00220493	0.0321894
27	rIOBe	12.65	21.8774	79.6785		27	IOB/A	0.00285	0.00207893	0.0364067
28	rIOBe	16.25	33.5322	85.5883		28	IOB/A	0.0009	0.000530749	0.0225814
29	IOB/A	17.75	30.4775	102.963		29	IOB/A	0.00145	0.0017167	0.0319804
30	IOB/A	24	35.2127	95.7951		30	DAO	0.00355	0.00166768	0.0251429
31	IOB/A	13.55	36.7258	87.2718		31	IOB/A	0.00275	0.000235919	0.00684551
32	IOB/A	12.75	38.6275	88.4986		32	DAO	0.00065	0.000466687	0.00933901
33	rMAO	17.55	28.2645	110.675		33	DAO	0.00085	0.000669874	0.00551773
34	PIO	12.55	33.9544	84.7825		34	IOBe/C	0.00135	0.000790892	0.0258772
35	rIOBe	64.9	50.7204	148.717		35	IOB/A	0.0021	0.00112054	0.0105118
36	rIOBe	13.3	42.0624	79.2294		36	IOBe/C	0.0065	0.00408558	0.239631
37	rIOBe	19.4	36.2496	90.6673		37	IOBe/C	0.0051	0.00408558	0.0751059
38	rIOBe	19.75	40.8766	64.1827		38	IOBe/C	0.0013	0.000694089	0.0162216
39	PIO	23.9	34.3934	105.132		39	IOB/A	0.0014	0.00229052	0.0134841
						40	IOB/A	0.0014	0.00079596	0.0281721
						41	rIOBe	0.0012	0.000963131	0.0303303
						42	rIOBe	0.0025	0.00102972	0.0236154
						43	IOB/A	0.0009	0.00060577	0.00748055
						44	IOBe/C	0.0009	0.000569368	0.0188135
						45	IOB/A	0.0055	0.00167898	0.0400952
						46	IOBe/C	0.00245	0.00109238	0.036798
						47	IOB/A	0.00215	0.00728639	0.0454616
						48	IOB/A	0.00095	0.00310334	0.02472
