# Supplementary material for: Cerebellar and vestibular nuclear synapses in the inferior olive have distinct release kinetics and neurotransmitters
Source: eLife. 2020 Dec 1;9:e61672. doi: 10.7554/eLife.61672 (PMC7707816; doi:10.7554/eLife.61672)
Supplement: Figure 5—source data 1. [file elife-61672-fig5-data1.xlsx]

## Sheet: Figure 5
Figure 5E-F
DCN-IO						VN-IO
Cell ID	GABA rise (ms)	GABA decay (ms)	Gly/GABA amp (ms)	Gly/GABA charge		Cell ID	GABA rise (ms)	GABA decay (ms)	Gly rise (ms)	Gly decay (ms)	Gly/GABA amp	Gly/GABA charge
1	12.8	117.798	0.100225	0.00835848		1	2.65	37.6544	1.05	7.88199	1.53966	0.239426
2	16.95	124.341	0.0138279	0.0446887		2	2.05	17.2222	0.9	4.94329	12.9595	0.818239
3	14.2	116.076	0.0238616	0.00157527		3	3.35	56.2338	2.6	5.88628	0.71872	0.10835
4	37.2	104.253	0.0220396	0.00579958		4	2.15	20.8417	1.9	5.88475	1.7725	0.435808
5	12.7	67.0811	0.0297233	0.00834471		5	3.45	50.2355	1.6	14.1689	0.350035	0.0893775
