# Supplementary material for: Cerebellar and vestibular nuclear synapses in the inferior olive have distinct release kinetics and neurotransmitters
Source: eLife. 2020 Dec 1;9:e61672. doi: 10.7554/eLife.61672 (PMC7707816; doi:10.7554/eLife.61672)
Supplement: Figure 6—source data 1. [file elife-61672-fig6-data1.xlsx]

## Sheet: Figure 6
Figure 6C, F
											PIO charge (norm.)					VN charge (norm.)
Cell	Decay (s)	Jitter	Rise		Cell	Decay (s)	Jitter	Rise		Stim #	Cell 1	Cell 2	Cell 3	Cell 4		Cell 1	Cell 2	Cell 3	Cell 4			PIO			VN
1	25.4888	11.8307	8.05		1	4.52075	0.45941	0.8		1	1	1	1	1		1	1	1	1		Cell	decay train (s)		Cell	decay train (s)
2	30.1716	8.48366	10.6		2	3.20754	0.196148	1		2	2.04291	1.38634	3.39541	3.36953		0.835916	0.821781	1.00154	1.21928		1	72.9371		1	3.28847
3	44.1467	21.6512	5.85		3	14.9458	0.448031	1.95		3	5.19143	1.668	3.7738	5.53422		0.662573	0.76074	0.982242	1.44576		2	46.9974		2	18.753
4	85.317	15.1113	7.65		4	10.9394	0.772811	0.7		4	10.2229	3.29577	3.54093	6.43871		0.630512	0.800589	1.03611	1.47868		3	184.398		3	25.5715
5	47.7959	14.991	7.9		5	12.8918	3.62728	1.05		5	11.9004	4.89317	3.01961	7.91761		0.596312	0.66442	1.03501	1.49453		4	94.3448		4	18.0018
										6	13.5168	6.18091	2.76293	7.78226		0.544477	0.67126	0.978022	1.5426
										7	13.3056	7.43752	2.57028	8.15612		0.469962	0.631486	1.01298	1.61028
										8	13.4633	7.87446	2.35565	8.5099		0.51744	0.626182	1.05312	1.57968
										9	12.8052	7.88283	2.16165	8.4947		0.507398	0.558002	0.912779	1.45277
										10	11.7282	8.96133	2.15042	8.43104		0.482863	0.580819	0.856662	1.44763
